# Supplementary material
Source: Royal Society of Chemistry journal article supplement (https://www.rsc.org/suppdata/dt/1998/545/i707986.doc)
Supplement: Supplementary file 1 [file i707986.doc]

Copyright The Royal Society of Chemistry, 1998

Supporting Information
Table S1. Cartesian coordinates for the experimental and theoretical structures*
(a) Ga(hfac)3 final GED refinement (ra structure)

Atom           x         y          z
Ga1          .0000     .0000     .0000
O2          1.3714     .8881   -1.0554
C3          2.6241     .7883    -.9368
C4          3.2703     .0000     .0000
C5          2.6241    -.7883     .9368
O6          1.3714    -.8881    1.0554
H7          4.3641     .0000     .0000
C8          3.4119    1.6279   -1.9346
F9          4.6549    1.8586   -1.4986
F10         3.5050    1.0127   -3.1183
F11         2.8271    2.8132   -2.1384
C12         3.4119   -1.6279    1.9346
F13         4.6549   -1.8586    1.4986
F14         3.5050   -1.0127    3.1183
F15         2.8271   -2.8132    2.1384
O16          .0834   -1.6317   -1.0554
C17         -.6293   -2.6667    -.9368
C18        -1.6351   -2.8321     .0000
C19        -1.9947   -1.8783     .9368
O20        -1.4548    -.7437    1.0554
H21        -2.1821   -3.7795     .0000
C22         -.2961   -3.7688   -1.9346
F23         -.7179   -4.9605   -1.4986
F24         -.8755   -3.5417   -3.1183
F25         1.0227   -3.8549   -2.1384
C26        -3.1158   -2.1408    1.9346
F27        -3.9370   -3.1019    1.4986
F28        -2.6295   -2.5290    3.1183
F29        -3.8498   -1.0418    2.1384
O30        -1.4548     .7437   -1.0554
C31        -1.9947    1.8783    -.9368
C32        -1.6351    2.8321     .0000
C33         -.6293    2.6667     .9368
O34          .0834    1.6317    1.0554
H35        -2.1821    3.7795     .0000
C36        -3.1158    2.1408   -1.9346
F37        -3.9370    3.1019   -1.4986
F38        -2.6295    2.5290   -3.1183
F39        -3.8498    1.0418   -2.1384
C40         -.2961    3.7688    1.9346
F41         -.7179    4.9605    1.4986
F42         -.8755    3.5417    3.1183
F43         1.0227    3.8549    2.1384

(b) In(hfac)3 final GED refinement (ra structure)

Atom           x         y          z
In1          .0000     .0000     .0000
O2          1.5688     .9514   -1.0715
C3          2.7957     .7898    -.8895
C4          3.5191     .0000     .0000
C5          2.7957    -.7898     .8895
O6          1.5688    -.9514    1.0715
H7          4.6116     .0000     .0000
C8          3.6783    1.6171   -1.8212
F9          4.9167    1.7210   -1.3258
F10         3.7537    1.0446   -3.0280
F11         3.1791    2.8494   -1.9698
C12         3.6783   -1.6171    1.8212
F13         4.9167   -1.7210    1.3258
F14         3.7537   -1.0446    3.0280
F15         3.1791   -2.8494    1.9698
O16          .0396   -1.8343   -1.0715
C17         -.7139   -2.8160    -.8895
C18        -1.7595   -3.0476     .0000
C19        -2.0818   -2.0263     .8895
O20        -1.6083    -.8829    1.0715
H21        -2.3058   -3.9938     .0000
C22         -.4387   -3.9941   -1.8212
F23         -.9680   -5.1185   -1.3258
F24         -.9722   -3.7731   -3.0280
F25          .8781   -4.1779   -1.9698
C26        -3.2396   -2.3770    1.8212
F27        -3.9487   -3.3975    1.3258
F28        -2.7815   -2.7285    3.0280
F29        -4.0572   -1.3285    1.9698
O30        -1.6083     .8829   -1.0715
C31        -2.0818    2.0263    -.8895
C32        -1.7595    3.0476     .0000
C33         -.7139    2.8160     .8895
O34          .0396    1.8343    1.0715
H35        -2.3058    3.9938     .0000
C36        -3.2396    2.3770   -1.8212
F37        -3.9487    3.3975   -1.3258
F38        -2.7815    2.7285   -3.0280
F39        -4.0572    1.3285   -1.9698
C40         -.4387    3.9941    1.8212
F41         -.9680    5.1185    1.3258
F42         -.9722    3.7731    3.0280
F43          .8781    4.1779    1.9698

(c) Ga(hfac)3 ab initio (SCF/"6-31G*" level) optimisation (re structure)

Atom                       x          y           z
Ga1                     .000000     .000000     .000000
C2                      .000000    3.348384     .000000
C3                     2.899786   -1.674192     .000000
C4                    -2.899786   -1.674192     .000000
C5                      .673302    2.651430     .994278
C6                     1.959555   -1.908811     .994278
C7                    -2.632856    -.742619     .994278
C8                     -.673302    2.651430    -.994278
C9                    -1.959555   -1.908811    -.994278
C10                    2.632856    -.742619    -.994278
O11                      .761451    1.418576    1.128031
O12                      .847798   -1.368724    1.128031
O13                    -1.609249    -.049852    1.128031
O14                     -.761451    1.418576   -1.128031
O15                     -.847798   -1.368724   -1.128031
O16                     1.609249    -.049852   -1.128031
H17                      .000000    4.415000     .000000
H18                    3.823502   -2.207500     .000000
H19                   -3.823502   -2.207500     .000000
C20                     1.423475    3.420193    2.083269
C21                     2.250236   -2.942862    2.083269
C22                    -3.673712    -.477331    2.083269
C23                    -1.423475    3.420193   -2.083269
C24                    -2.250236   -2.942862   -2.083269
C25                     3.673712    -.477331   -2.083269
F26                     1.321583    4.724959    1.935385
F27                     3.431143   -3.507004    1.935385
F28                    -4.752726   -1.217955    1.935385
F29                    -1.321583    4.724959   -1.935385
F30                    -3.431143   -3.507004   -1.935385
F31                     4.752726   -1.217955   -1.935385
F32                      .943946    3.100537    3.263097
F33                     2.213171   -2.367749    3.263097
F34                    -3.157116    -.732787    3.263097
F35                     -.943946    3.100537   -3.263097
F36                    -2.213171   -2.367749   -3.263097
F37                     3.157116    -.732787   -3.263097
F38                     2.698718    3.100802    2.045341
F39                     1.336014   -3.887559    2.045341
F40                    -4.034732     .786757    2.045341
F41                    -2.698718    3.100802   -2.045341
F42                    -1.336014   -3.887559   -2.045341
F43                     4.034732     .786757   -2.045341

(d) Ga(hfac)3 ab initio (BP86/"6-31G*" level) optimisation (re structure)

Atom                       x          y           z
Ga1                     .000000     .000000     .000000
C2                      .000000    3.334199     .000000
C3                     2.887501   -1.667099     .000000
C4                    -2.887501   -1.667099     .000000
C5                      .704497    2.656353    1.006309
C6                     1.948221   -1.938288    1.006309
C7                    -2.652717    -.718064    1.006309
C8                     -.704497    2.656353   -1.006309
C9                    -1.948221   -1.938288   -1.006309
C10                     2.652717    -.718064   -1.006309
O11                      .811834    1.391151    1.176391
O12                      .798855   -1.398644    1.176391
O13                    -1.610689     .007493    1.176391
O14                     -.811834    1.391151   -1.176391
O15                     -.798855   -1.398644   -1.176391
O16                     1.610689     .007493   -1.176391
H17                      .000000    4.421946     .000000
H18                     3.829517   -2.210973     .000000
H19                    -3.829517   -2.210973     .000000
C20                     1.468989    3.473058    2.071353
C21                     2.273263   -3.008711    2.071353
C22                    -3.742251    -.464348    2.071353
C23                    -1.468989    3.473058   -2.071353
C24                    -2.273263   -3.008711   -2.071353
C25                     3.742251    -.464348   -2.071353
F26                     1.335454    4.810173    1.880860
F27                     3.498005   -3.561624    1.880860
F28                    -4.833460   -1.248549    1.880860
F29                    -1.335454    4.810173   -1.880860
F30                    -3.498005   -3.561624   -1.880860
F31                     4.833460   -1.248549   -1.880860
F32                     1.006310    3.172391    3.304914
F33                     2.244216   -2.457686    3.304914
F34                    -3.250526    -.714705    3.304914
F35                    -1.006310    3.172391   -3.304914
F36                    -2.244216   -2.457686   -3.304914
F37                     3.250526    -.714705   -3.304914
F38                     2.787223    3.168827    2.022630
F39                     1.350673   -3.998220    2.022630
F40                    -4.137896     .829393    2.022630
F41                    -2.787223    3.168827   -2.022630
F42                    -1.350673   -3.998220   -2.022630
F43                     4.137896     .829393   -2.022630

(e) In(hfac)3 ab initio (SCF/"6-31G*" level) optimisation (re structure)

Atom                       x          y           z
In1                     .000000     .000000     .000000
C2                      .000000    3.472101     .000000
C3                     3.006927   -1.736050     .000000
C4                    -3.006927   -1.736050     .000000
C5                      .655774    2.783043    1.013502
C6                     2.082299   -1.959439    1.013502
C7                    -2.738073    -.823604    1.013502
C8                     -.655774    2.783043   -1.013502
C9                    -2.082299   -1.959439   -1.013502
C10                    2.738073    -.823604   -1.013502
O11                     .750809    1.552556    1.158734
O12                     .969148   -1.426498    1.158734
O13                   -1.719958    -.126058    1.158734
O14                    -.750809    1.552556   -1.158734
O15                    -.969148   -1.426498   -1.158734
O16                    1.719958    -.126058   -1.158734
H17                     .000000    4.538710     .000000
H18                    3.930639   -2.269355     .000000
H19                   -3.930639   -2.269355     .000000
C20                    1.373219    3.568016    2.114263
C21                    2.403383   -2.973250    2.114263
C22                   -3.776602    -.594766    2.114263
C23                   -1.373219    3.568016   -2.114263
C24                   -2.403383   -2.973250   -2.114263
C25                    3.776602    -.594766   -2.114263
F26                    1.279337    4.871064    1.946673
F27                    3.578797   -3.543471    1.946673
F28                   -4.858134   -1.327594    1.946673
F29                   -1.279337    4.871064   -1.946673
F30                   -3.578797   -3.543471   -1.946673
F31                    4.858134   -1.327594   -1.946673
F32                     .854837    3.265035    3.282631
F33                    2.400185   -2.372828    3.282631
F34                   -3.255021    -.892207    3.282631
F35                    -.854837    3.265035   -3.282631
F36                   -2.400185   -2.372828   -3.282631
F37                    3.255021    -.892207   -3.282631
F38                    2.648280    3.246202    2.122615
F39                    1.487153   -3.916579    2.122615
F40                   -4.135433     .670377    2.122615
F41                   -2.648280    3.246202   -2.122615
F42                   -1.487153   -3.916579   -2.122615
F43                    4.135433     .670377   -2.122615

(f) In(hfac)3 ab initio (BP86/"6-31G*" level) optimisation (re structure)

Atom                       x          y           z
In1                     .000000     .000000     .000000
C2                      .000000    3.476380     .000000
C3                     3.010633   -1.738190     .000000
C4                    -3.010633   -1.738190     .000000
C5                      .678458    2.805878    1.031398
C6                     2.090733   -1.990501    1.031398
C7                    -2.769191    -.815377    1.031398
C8                     -.678458    2.805878   -1.031398
C9                    -2.090733   -1.990501   -1.031398
C10                    2.769191    -.815377   -1.031398
O11                     .791348    1.543931    1.212200
O12                     .941409   -1.457293    1.212200
O13                   -1.732757    -.086638    1.212200
O14                    -.791348    1.543931   -1.212200
O15                    -.941409   -1.457293   -1.212200
O16                    1.732757    -.086638   -1.212200
H17                     .000000    4.564328     .000000
H18                    3.952824   -2.282164     .000000
H19                   -3.952824   -2.282164     .000000
C20                    1.408916    3.638209    2.110161
C21                    2.446324   -3.039262    2.110161
C22                   -3.855240    -.598947    2.110161
C23                   -1.408916    3.638209   -2.110161
C24                   -2.446324   -3.039262   -2.110161
C25                    3.855240    -.598947   -2.110161
F26                    1.268305    4.973408    1.912400
F27                    3.672945   -3.585088    1.912400
F28                   -4.941250   -1.388319    1.912400
F29                   -1.268305    4.973408   -1.912400
F30                   -3.672945   -3.585088   -1.912400
F31                    4.941250   -1.388319   -1.912400
F32                     .921760    3.338016    3.334874
F33                    2.429927   -2.467275    3.334874
F34                   -3.351686    -.870741    3.334874
F35                    -.921760    3.338016   -3.334874
F36                   -2.429927   -2.467275   -3.334874
F37                    3.351686    -.870741   -3.334874
F38                    2.730605    3.345296    2.092431
F39                    1.531809   -4.037421    2.092431
F40                   -4.262414     .692125    2.092431
F41                   -2.730605    3.345296   -2.092431
F42                   -1.531809   -4.037421   -2.092431
F43                    4.262414     .692125   -2.092431

* For conversion of numbering systems, see table below

GED	ab initio		GED	ab initio	
E1	E1		F23	F29	
O2	O15		F24	F35	
C3	C9		F25	F41	
C4	C4		C26	C20	
C5	C7		F27	F26	
O6	O13		F28	F32	
H7	H19		F29	F38	
C8	C24		O30	O16	
F9	F30		C31	C10	
F10	F36		C32	C3	
F11	F42		C33	C6	
C12	C22		O34	O12	
F13	F28		H35	H18	
F14	F34		C36	C25	
F15	F40		F37	F31	
O16	O14		F38	F37	
C17	C8		F39	F43	
C18	C2		C40	C21	
C19	C5		F41	F27	
O20	O11		F42	F33	
H21	H17		F43	F39	


Table S2. Absolute energies (Hartrees) for the theoretical computations

	Level/basis set	
Compound	SCF/"6-31G*"	DFT/"6-31G*"	
Ga(hfac)3	-4732.27223	-4747.29277	
In(hfac)3	-2810.83747	-2824.08097	

Table S3. Restraints used in the final GED refinements
(a) Ga(hfac)3

No.  Parameter   Observed    Calculated   D(Obs - Calc)   Uncertainty
Distance
1    C-C(ring)   1.39550      1.38442     0.01108         0.00625
2    C-H         1.08800      1.09389    -0.00589         0.02000
3    C-C(F)      1.53750      1.52357     0.01393         0.00750
Amplitude
4    O(2)C(33)  0.14120      0.14837    -0.00717         0.01412
5    F(9)F(15)  0.30410      0.29286     0.01124         0.03041
6    Ga(1)F(11) 0.17510      0.13449     0.04061         0.01751
7    O(2)F(11)  0.17760      0.17339     0.00421         0.01776
8    Ga(1)C(3)  0.07320      0.07069     0.00251         0.00732
9    Ga(1)F(10) 0.17850      0.19414    -0.01564         0.01785
10   Ga(1)F(9)  0.08950      0.10317    -0.01367         0.00895
11   F(9)F(10)  0.05960      0.05683     0.00277         0.00596
12   O(2)F(10)  0.17700      0.17518     0.00182         0.01770
13   C(3)F(9)   0.06760      0.07235    -0.00475         0.00676
14   Ga(1)C(8)  0.08870      0.09369    -0.00499         0.00887
15   O(2)F(14)  0.15980      0.14421     0.01559         0.01598
16   O(2)C(8)   0.08640      0.08790    -0.00150         0.00864
17   Ga-O        0.07230      0.07515    -0.00285         0.00723
18   C-F         0.04370      0.03982     0.00388         0.00437
19   O-C         0.04040      0.03948     0.00092         0.00404
20   C-C(ring)   0.04670      0.04523     0.00147         0.00467
21   C-C(F)      0.05000      0.05165    -0.00165         0.00500
22   O(2)C(4)   0.05520      0.05848    -0.00328         0.00552
23   C(4)F(9)   0.11020      0.09969     0.01051         0.01102
24   C(4)F(10)  0.17820      0.18220    -0.00400         0.01782
25   O(2)C(31)  0.10860      0.11014    -0.00154         0.01086
26   C(3)F(14)  0.19890      0.19994    -0.00104         0.01989
27   O(2)C(18)  0.11770      0.11102     0.00668         0.01177
28   O(2)F(13)  0.10500      0.09769     0.00731         0.01050
29   O(2)F(28)  0.14860      0.14901    -0.00041         0.01486
30   F(9)F(25)  0.28390      0.27033     0.01357         0.02839
31   O(2)F(27)  0.11800      0.11562     0.00238         0.01180
32   C(3)F(23)  0.13700      0.14150    -0.00450         0.01370
33   C(4)F(28)  0.13450      0.13068     0.00382         0.01345
34   C(8)F(24)  0.25570      0.22664     0.02906         0.02557

(b) In(hfac)3

No.  Parameter   Observed    Calculated   D(Obs - Calc)   Uncertainty
Distance/Angle
1    C-C(ring)   1.39750     1.39218      0.00532         0.00750
2    C-H         1.08800     1.09255     -0.00455         0.02000
3    C-C(F)      1.53850     1.52700      0.01150         0.00750
4    O-C-C(F)    113.000     114.089     -1.08869         1.00000
Amplitude
5    In(1)C(3)  0.07320     0.07929     -0.00609         0.00732
6    In(1)F(10) 0.20200     0.18019      0.02181         0.02020
7    In(1)F(9)  0.08950     0.11320     -0.02370         0.00899
8    F(9)F(10)  0.06550     0.06564     -0.00014         0.00655
9    O(2)F(10)  0.19340     0.19976     -0.00636         0.01934
10   C(3)F(9)   0.07030     0.07028      0.00002         0.00703
11   In(1)C(8)  0.09050     0.11174     -0.02124         0.00905
12   O(2)F(14)  0.17700     0.14564      0.03136         0.01770
13   O(2)C(8)   0.07150     0.07009      0.00141         0.00715
14   Ga-O        0.06980     0.07200     -0.00220         0.00698
15   C-F         0.04510     0.04418      0.00092         0.00451
16   O-C         0.04250     0.04071      0.00179         0.00425
17   C-C(ring)   0.04750     0.04721      0.00029         0.00475
18   C-C(F)      0.05390     0.05624     -0.00234         0.00539
19   O(2)C(4)   0.06990     0.07224     -0.00234         0.00699
20   O(2)O(30)  0.14100     0.13994      0.00106         0.01410
21   C(4)C(8)   0.06940     0.07028     -0.00088         0.00694
22   C(4)F(9)   0.11080     0.11512     -0.00432         0.01108
23   O(2)O(34)  0.15920     0.15774      0.00146         0.01592
24   O(2)F(9)   0.06920     0.07553     -0.00633         0.00692
25   C(4)F(10)  0.18720     0.17411      0.01309         0.01872
26   O(2)C(31)  0.12070     0.13128     -0.01058         0.01207
27   O(6)C(18)  0.16300     0.13324      0.02976         0.01630
28   C(3)F(14)  0.21130     0.22775     -0.01645         0.02113
29   O(6)F(24)  0.21540     0.21525      0.00015         0.02154
30   O(2)C(18)  0.13480     0.14976     -0.01496         0.01348
31   O(2)F(13)  0.10850     0.11202     -0.00352         0.01085
32   O(6)F(28)  0.13390     0.12326      0.01064         0.01339
33   O(6)C(26)  0.11310     0.10920      0.00390         0.01131
34   O(2)C(17)  0.14880     0.16490     -0.01610         0.01488
35   O(2)C(12)  0.09200     0.10285     -0.01085         0.00920
36   O(6)F(29)  0.16350     0.14584      0.01766         0.01635
37   O(2)F(28)  0.15950     0.16179     -0.00229         0.01595
38   In(1)F(11) 0.19750     0.16089      0.03661         0.01975
39   O(2)F(11)  0.19010     0.19636     -0.00626         0.01901

µÿi--ð'ÿÿ--Åÿ@¡ÿÀ	ú"-½ÿF¡ÿ=--ð'ÿÿ--©ÿEÿ-	ú"-¡ÿ=ÿ---ð'ÿÿ--ÿ5uÿ	ú"-ÿ-uÿ--ð'ÿÿ--ÿgÿý	ú"-uÿgÿý--ð'ÿÿ--@Àá	ú"-gÿýaÿá--ð'ÿÿ--@éÀÃ	ú"-aÿábÿÃ--ð'ÿÿ--@ËÀ§	ú"-bÿÃjÿ§--ð'ÿÿ--ÿ¯jÿ	ú"-jÿ§ÿ--ð'ÿÿ--ÿÿz	ú"-ÿÿz--ð'ÿÿ--²ÿÿl	ú"-ÿzªÿl--ð'ÿÿ--Ïÿ@ªÿÀ	ú"-ªÿlÇÿf--ð'ÿÿ--íÿ@ÇÿÀ	ú"-Çÿfåÿg--ð'ÿÿ--	@åÿÀ	ú"-åÿgp--ð'ÿÿ--"p	ú"-p--ð'ÿÿ--@ÀÀ	ú"-3>¸--ð'ÿÿ--@ÜÀ¸	ú"->¸BÔ--ð'ÿÿ--@øÀÔ	ú"-BÔ?ð--ð'ÿÿ--@Àð	ú"-?ð5--ð'ÿÿ--=*%	ú"-5%"--ð'ÿÿ---="	ú"-%"5--ð'ÿÿ--@÷ÿÀ	ú"-5÷ÿA--ð'ÿÿ--ÿÿ@ÛÿÀ	ú"-÷ÿAÛÿG--ð'ÿÿ--@_ÀG	ú"-ÇÿEÇÿY--ð'ÿÿ--Ðÿ@ÇÿÀ	ú"-ÅÿGÊÿG--ð'ÿÿ--Òÿ@ÈÿÀ	ú"-ÆÿGÌÿG--ð'ÿÿ--Óÿ@ÊÿÀ	ú"-ÈÿGÍÿG--ð'ÿÿ--Öÿ@ËÿÀ	ú"-ÉÿGÐÿG--ð'ÿÿ--Øÿ@ÎÿÀ	ú"-ÌÿGÒÿG--ð'ÿÿ--Ûÿ@ÐÿÀ	ú"-ÎÿGÕÿG--ð'ÿÿ--Ýÿ@ÓÿÀ	ú"-ÑÿG×ÿG--ð'ÿÿ--ßÿ@ÕÿÀ	ú"-ÓÿGÙÿG--ð'ÿÿ--áÿ@×ÿÀ	ú"-ÕÿGÛÿG--ð'ÿÿ--âÿ@ÙÿÀ	ú"-×ÿGÜÿG--ð'ÿÿ--ãÿ@ÚÿÀ	ú"-ØÿGÝÿG--ð'ÿÿ-- µ«	ú"-«­--ð'ÿÿ--@À	ú"-­­--ð'ÿÿ--µ«	ú"-­«--ð'ÿÿ--³ª	ú"-«ª--ð'ÿÿ--²¨	ú"-ª¨--ð'ÿÿ--°¦	ú"-¨¦--ð'ÿÿ--@®À£	ú"-¦	£--ð'ÿÿ--«¡	ú"-	£¡--ð'ÿÿ--@©À	ú"-£--ð'ÿÿ--@¦À	ú"- --ð'ÿÿ--¤	ú"-	--ð'ÿÿ--?ÿ	ÿÞ	ú"-ÿ7ÿÞ--ð'ÿÿ--ÿÚîþª	ú"-ÿªîþÒ--ð'ÿÿ--äþ·¼þ	ú"-¼þ¯Üþ--ð'ÿÿ--Dÿ'!ÿ	ú"-<ÿ!ÿ--ð'ÿÿ--2ÿðÿÁ	ú"-ÿè*ÿÁ--ð'ÿÿ--ÿÇ×þ	ú"-ýþ×þ¿--ð'ÿÿ--¸þ®þ	ú"-þ¦°þ--ð'ÿÿ--Ôþ@®þÀ	ú"-Ìþp®þl--ð'ÿÿ--¶þ@þÀ	ú"-®þlþ`--ð'ÿÿ--þhzþM	ú"-þ`zþM--ð'ÿÿ--þUhþ4	ú"-zþMhþ4--ð'ÿÿ--@<À	ú"-hþ4^þ--ð'ÿÿ--@ Àú	ú"-^þ[þú--ð'ÿÿ--@ÀÜ	ú"-[þú`þÜ--ð'ÿÿ--vþä`þÀ	ú"-`þÜnþÀ--ð'ÿÿ--þÈnþª	ú"-nþÀþª--ð'ÿÿ--£þ²þ	ú"-þªþ--ð'ÿÿ--Àþ@þÀ	ú"-þ¸þ--ð'ÿÿ--ñþ@ÌþÀ	ú"-Ìþéþ--ð'ÿÿ--ÿ@éþÀ	ú"-éþÿ--ð'ÿÿ--$ÿ·ÿ	ú"-ÿÿ¯--ð'ÿÿ--6ÿÎÿ¯	ú"-ÿ¯.ÿÆ--ð'ÿÿ--@êÀÆ	ú"-.ÿÆ9ÿâ--ð'ÿÿ--@Àâ	ú"-9ÿâ=ÿÿ--ð'ÿÿ--@$Àÿ	ú"-=ÿÿ9ÿ--ð'ÿÿ--@@À	ú"-9ÿ.ÿ8--ð'ÿÿ--ÿlÿþU	ú"-ÿUÿþd--ð'ÿÿ--ÿ@æþÀ	ú"-ÿþdæþm--ð'ÿÿ--îþ@ÌþÀ	ú"-æþmÌþp--ð'ÿÿ--ÿDÿ:	ú"-ÿ<ÿ:--ð'ÿÿ--@BÀ8	ú"-ÿ<ÿ6--ð'ÿÿ--@@À5	ú"-ÿ:ÿ3--ð'ÿÿ--ÿ=ÿ3	ú"-ÿ5ÿ3--ð'ÿÿ--ÿ;ÿ0	ú"-ÿ3ÿ0--ð'ÿÿ--ÿ8ÿ-	ú"-ÿ0ÿ---ð'ÿÿ--ÿ5ÿ,	ú"-ÿ-	ÿ,--ð'ÿÿ--ÿ4	ÿ*	ú"-	ÿ,ÿ*--ð'ÿÿ--ÿ2ÿ)	ú"-ÿ*ÿ)--ð'ÿÿ--ÿ@ÿÀ	ú"-ÿ)ÿ)--ð'ÿÿ--ÿ2ÿ)	ú"-ÿ)ÿ*--ð'ÿÿ--Óþ@ÈþÀ	ú"-ÍþÆþ--ð'ÿÿ--Ðþ@ÅþÀ	ú"-ÊþÃþ--ð'ÿÿ--Íþ@ÁþÀ	ú"-Çþ¿þ--ð'ÿÿ--Éþ@¾þÀ	ú"-Áþ¾þ--ð'ÿÿ--Æþ@»þÀ	ú"-Àþ¹þ--ð'ÿÿ-- ÿiôþ=	ú"-ôþaÿ=--ð'ÿÿ--çþ:Îþ!	ú"-ßþ!Îþ2--ð'ÿÿ--Äþþï	ú"-þ¼þï--ð'ÿÿ--$ÿÿc	ú"-ÿcÿ~--ð'ÿÿ--ÿPãþ!	ú"-ãþHÿ!--ð'ÿÿ--Òþ&·þ	ú"-Êþ·þ--ð'ÿÿ--þþñ	ú"-þþñ--ð'ÿÿ--ªþ@þÀ	ú"-¢þÏþÉ--ð'ÿÿ--þÑjþº	ú"-þÉjþº--ð'ÿÿ--rþÂTþ¥	ú"-jþºTþ¥--ð'ÿÿ--­Dþ	ú"-Tþ¥Dþ--ð'ÿÿ--@Ào	ú"-Dþ<þo--ð'ÿÿ--@wÀP	ú"-<þo;þP--ð'ÿÿ--@XÀ3	ú"-;þPDþ3--ð'ÿÿ--[þ;Dþ	ú"-Dþ3Sþ--ð'ÿÿ--pþ!Sþ	ú"-Sþhþ--ð'ÿÿ--þhþõ	ú"-hþþõ--ð'ÿÿ--¨þ@þÀ	ú"-þõ þî--ð'ÿÿ--Çþ@ þÀ	ú"- þî¿þï--ð'ÿÿ--ãþ@¿þÀ	ú"-¿þïÛþø--ð'ÿÿ--ÿ'ôþ	ú"-ôþ	ÿ--ð'ÿÿ--@BÀ	ú"-	ÿÿ:--ð'ÿÿ--@`À:	ú"-ÿ:ÿX--ð'ÿÿ--@ÀX	ú"-ÿXÿw--ð'ÿÿ--@Àw	ú"-ÿwÿ--ð'ÿÿ--ÿ´þþ	ú"-ÿþþ¬--ð'ÿÿ--ÿÈåþ¬	ú"-þþ¬åþÀ--ð'ÿÿ--íþ@ÉþÀ	ú"-åþÀÉþÌ--ð'ÿÿ--°þ@§þÀ	ú"-¥þÏªþÏ--ð'ÿÿ--±þ×¨þÎ	ú"-¨þÏ©þÎ--ð'ÿÿ--´þ@©þÀ	ú"-©þÎ¬þÍ--ð'ÿÿ--·þ@¬þÀ	ú"-ªþÍ±þÍ--ð'ÿÿ--ºþ@¯þÀ	ú"-­þÍ´þÍ--ð'ÿÿ--¾þ@²þÀ	ú"-²þÍ¶þÌ--ð'ÿÿ--Áþ@¶þÀ	ú"-´þÌ»þÌ--ð'ÿÿ--Äþ@¹þÀ	ú"-·þÌ¾þÌ--ð'ÿÿ--Çþ@¼þÀ	ú"-ºþÌÁþÌ--ð'ÿÿ--Èþ@¿þÀ	ú"-½þÌÂþÌ--ð'ÿÿ--ÉþÕÀþÌ	ú"-ÀþÌÁþÍ--ð'ÿÿ--ðþçþ	ú"-èþçþ--ð'ÿÿ--ïþ@åþÀ	ú"-éþãþ--ð'ÿÿ--íþ@âþÀ	ú"-çþàþ--ð'ÿÿ--êþ@àþÀ	ú"-äþÞþ--ð'ÿÿ--èþ@ÝþÀ	ú"-àþÝþ--ð'ÿÿ--åþÚþ	ú"-ÝþÚþ--ð'ÿÿ--âþØþ	ú"-ÚþØþ--ð'ÿÿ--àþÖþ	ú"-ØþÖþ--ð'ÿÿ--ÞþÕþ	ú"-ÖþÕþ--ð'ÿÿ--@À	ú"-ÕþÕþ	--ð'ÿÿ--@À	ú"-ÕþÕþ--ð'ÿÿ--Øÿ@»ÿÀ	ú"-Ðÿ»ÿ--ð'ÿÿ--Ãÿ©ÿx	ú"-»ÿ©ÿx--ð'ÿÿ--±ÿÿh	ú"-©ÿxÿh--ð'ÿÿ--¢ÿpÿV	ú"-ÿhÿV--ð'ÿÿ--@^ÀA	ú"-ÿVÿA--ð'ÿÿ--@IÀ,	ú"-ÿAÿ,--ð'ÿÿ--£ÿ4ÿ	ú"-ÿ,ÿ--ð'ÿÿ--²ÿ"ÿ	ú"-ÿªÿ--ð'ÿÿ--Åÿ@ªÿÀ	ú"-ªÿ½ÿ--ð'ÿÿ--þÿ@ãÿÀ	ú"-ãÿöÿ--ð'ÿÿ--"öÿ	ú"-öÿ--ð'ÿÿ--4	ú"-,--ð'ÿÿ--@IÀ,	ú"-,A--ð'ÿÿ--@^ÀA	ú"-AV--ð'ÿÿ--pV	ú"-Vh--ð'ÿÿ--÷ÿh	ú"-h÷ÿx--ð'ÿÿ--ÿÿåÿx	ú"-÷ÿxåÿ--ð'ÿÿ--íÿ@ÐÿÀ	ú"-åÿÐÿ--ð'ÿÿ--âÿ@ÙÿÀ	ú"-Üÿ×ÿ--ð'ÿÿ--áÿ@×ÿÀ	ú"-ÛÿÕÿ--ð'ÿÿ--ßÿ@ÕÿÀ	ú"-ÙÿÓÿ--ð'ÿÿ--Ýÿ@ÒÿÀ	ú"-×ÿÐÿ--ð'ÿÿ--Úÿ@ÏÿÀ	ú"-ÔÿÍÿ--ð'ÿÿ--×ÿ@ËÿÀ	ú"-ÑÿÉÿ--ð'ÿÿ--Óÿ@ÉÿÀ	ú"-ÍÿÇÿ--ð'ÿÿ--Ñÿ@ÇÿÀ	ú"-ËÿÅÿ--ð'ÿÿ--@À	ú"-ÇÿþÇÿ--ð'ÿÿ--b7æ	ú"-7Zæ--ð'ÿÿ--Aã³	ú"-9³Û--ð'ÿÿ--Àß	ú"-ß¸ÿ--ð'ÿÿ--g/D	ú"-_D'--ð'ÿÿ--Uø&É	ú"-&ðMÉ--ð'ÿÿ--(Ïú¢	ú"- ¢úÇ--ð'ÿÿ--Û¶¾	ú"-¾®Ó--ð'ÿÿ--ö@ÑÀ	ú"-îxÑu--ð'ÿÿ--Ù@µÀ	ú"-Ñuµi--ð'ÿÿ--½qW	ú"-µiW--ð'ÿÿ-- ß¾	ú"-×¾--ð'ÿÿ--µÆ«	ú"-¾­«--ð'ÿÿ--Ï³­	ú"-­«Ç--ð'ÿÿ--í@ÇÀ	ú"-Çå--ð'ÿÿ--@åÀ	ú"-å--ð'ÿÿ--&@À	ú"-¡--ð'ÿÿ--?¹¡	ú"-¡7±--ð'ÿÿ--SÏ7±	ú"-7±KÇ--ð'ÿÿ--@Àê	ú"-[ê_--ð'ÿÿ--@,À	ú"-_[$--ð'ÿÿ--@HÀ$	ú"-[$P@--ð'ÿÿ--X_>@	ú"-P@>W--ð'ÿÿ--Fq'W	ú"->W'i--ð'ÿÿ--/@À	ú"-'iu--ð'ÿÿ--@îÀ	ú"-uîx--ð'ÿÿ--`@VÀ	ú"-ZâTâ--ð'ÿÿ--^êUá	ú"-VâUá--ð'ÿÿ--@éÀÞ	ú"-UáTÞ--ð'ÿÿ--æSÜ	ú"-TÞSÜ--ð'ÿÿ--[äQÙ	ú"-SÜQÙ--ð'ÿÿ--YáOÖ	ú"-QÙOÖ--ð'ÿÿ--@ÞÀÓ	ú"-OÖNÓ--ð'ÿÿ--@ÛÀÐ	ú"-NÓMÐ--ð'ÿÿ--UØLÎ	ú"-MÐLÎ--ð'ÿÿ--@ÖÀÌ	ú"-LÐLÊ--ð'ÿÿ--@ÔÀË	ú"-LÎLÉ--ð'ÿÿ--Ä@ºÀ	ú"-¸¾--ð'ÿÿ--Ç@¼À	ú"-¼¿--ð'ÿÿ--É¿	ú"-¿Á--ð'ÿÿ--ËÁ	ú"-ÁÃ	--ð'ÿÿ--@À		ú"-Ã	Ä--ð'ÿÿ--@À	ú"-ÄÄ--ð'ÿÿ--@À	ú"-ÄÄ--ð'ÿÿ--@À	ú"-ÄÃ--ð'ÿÿ--ËÁ	ú"-ÃÁ--ð'ÿÿ--É!¿	ú"-Á¿--ð'ÿÿ--Ç"½	ú"-¿½--ð'ÿÿ--¦¬|	ú"-|¤--ð'ÿÿ--~UQ	ú"-QUv--ð'ÿÿ--6]!H	ú"-!U.H--ð'ÿÿ--¬È¦	ú"-¤¦À--ð'ÿÿ--jf	ú"-jf--ð'ÿÿ--hl=A	ú"-`A=d--ð'ÿÿ--	[ùK	ú"-ùSK--ð'ÿÿ--B@À	ú"-:--ð'ÿÿ--'@À	ú"---ð'ÿÿ--ñò	ú"-ñò--ð'ÿÿ--ùúàÝ	ú"-ñòàÝ--ð'ÿÿ--èåÔÅ	ú"-àÝÔÅ--ð'ÿÿ--@ÍÀ«	ú"-ÔÅÏ«--ð'ÿÿ--@³À	ú"-Ï«Ñ--ð'ÿÿ--@Àw	ú"-ÑÚw--ð'ÿÿ--ðÚ`	ú"-Úwè`--ð'ÿÿ--hèN	ú"-è`üN--ð'ÿÿ--VüA	ú"-üNA--ð'ÿÿ--]@:À	ú"-::U>--ð'ÿÿ--w@UÀ	ú"-U>oH--ð'ÿÿ--aoH	ú"-oHY--ð'ÿÿ--wY	ú"-Yo--ð'ÿÿ--@Ào	ú"-o¡--ð'ÿÿ--@­À	ú"-¡¤¥--ð'ÿÿ--@ÈÀ¥	ú"-¤¥¡À--ð'ÿÿ--@âÀÀ	ú"-¡ÀÚ--ð'ÿÿ--øÚ	ú"-Úð--ð'ÿÿ--	oð	ú"-ðo--ð'ÿÿ--w@UÀ	ú"-oU--ð'ÿÿ--]@:À	ú"-U:--ð'ÿÿ--@JÀ@	ú"-4>4D--ð'ÿÿ--<K2B	ú"-4B2C--ð'ÿÿ--:L0C	ú"-2C0D--ð'ÿÿ--8@-À	ú"-0D-E--ð'ÿÿ--5@*À	ú"--E*F--ð'ÿÿ--2@'À	ú"-*F'G--ð'ÿÿ--/@#À	ú"-)G!G--ð'ÿÿ--+@!À	ú"-%GG--ð'ÿÿ--)@À	ú"-#GG--ð'ÿÿ--&OF	ú"-GF--ð'ÿÿ--@NÀE	ú"-HC--ð'ÿÿ---d	ú"-d%--ð'ÿÿ--kÿ=Ñ	ú"-cÑ=÷--ð'ÿÿ--,ß	¼	ú"-	×$¼--ð'ÿÿ--Jr(	ú"-(rB--ð'ÿÿ--Rç	ú"-Rxç--ð'ÿÿ--Oí%Â	ú"-GÂ%å--ð'ÿÿ--ñÜáÌ	ú"-áÔéÌ--ð'ÿÿ--)@À	ú"-!--ð'ÿÿ--@ìÀ	ú"-ì--ð'ÿÿ--ôÖq	ú"-ìÖq--ð'ÿÿ--ÞyÅ[	ú"-ÖqÅ[--ð'ÿÿ--@cÀB	ú"-Å[»B--ð'ÿÿ--@JÀ&	ú"-»B·&--ð'ÿÿ--@.À	ú"-·&»--ð'ÿÿ--@Àñ	ú"-»Åñ--ð'ÿÿ--ÞùÅÛ	ú"-ÅñÖÛ--ð'ÿÿ--ôãÖÊ	ú"-ÖÛìÊ--ð'ÿÿ--@ìÀ	ú"-ìÊ¿--ð'ÿÿ--)@À	ú"-¿!¼--ð'ÿÿ--E@!À	ú"-!¼=¿--ð'ÿÿ--_@=À	ú"-=¿WÊ--ð'ÿÿ--uãWÊ	ú"-WÊmÛ--ð'ÿÿ--ùmÛ	ú"-mÛ~ñ--ð'ÿÿ--@Àñ	ú"-~ñ--ð'ÿÿ--@.À	ú"-&--ð'ÿÿ--@JÀ&	ú"-&B--ð'ÿÿ--@cÀB	ú"-B~[--ð'ÿÿ--ym[	ú"-~[mq--ð'ÿÿ--uWq	ú"-mqW--ð'ÿÿ--_@=À	ú"-W=--ð'ÿÿ--E@!À	ú"-=!--ð'ÿÿ--åM¼#	ú"-¼EÝ#--ð'ÿÿ--Âò	ú"-ºò--ð'ÿÿ--ÿ`Ü	ú"-`÷Ü--ð'ÿÿ--ëjÉH	ú"-ãHÉb--ð'ÿÿ--×5ª	ú"-ª-Ï--ð'ÿÿ--¦|â	ú"-â|--ð'ÿÿ--Hü8ì	ú"-8ô@ì--ð'ÿÿ--@]À	ú"-y°]­--ð'ÿÿ--e@DÀ	ú"-]­D¢--ð'ÿÿ--Lª.	ú"-D¢.--ð'ÿÿ--6	ú"-.--ð'ÿÿ--@Àb	ú"-b--ð'ÿÿ--@jÀF	ú"-bF--ð'ÿÿ--@NÀ*	ú"-F*--ð'ÿÿ--@2À	ú"-*--ð'ÿÿ--6û	ú"-.û--ð'ÿÿ--L.ê	ú"-.ûDê--ð'ÿÿ--e@DÀ	ú"-Dê]ß--ð'ÿÿ--@]À	ú"-]ßyÛ--ð'ÿÿ--@yÀ	ú"-yÛß--ð'ÿÿ--¶@À	ú"-ß®ê--ð'ÿÿ--Ì®ê	ú"-®êÄû--ð'ÿÿ--ÝÄû	ú"-ÄûÕ--ð'ÿÿ--@2À	ú"-Õß*--ð'ÿÿ--@NÀ*	ú"-ß*ãF--ð'ÿÿ--@jÀF	ú"-ãFßb--ð'ÿÿ--@Àb	ú"-ßbÕ--ð'ÿÿ--ÝÄ	ú"-ÕÄ--ð'ÿÿ--Ìª®	ú"-Ä®¢--ð'ÿÿ--¶@À	ú"-®¢­--ð'ÿÿ--@yÀ	ú"-­y°--ð'ÿÿ--(þýýã	ú"-ýý þã--ð'ÿÿ--æýß×ýÐ	ú"-ÞýÐ×ý×--ð'ÿÿ--Íý¼¥ý	ú"-¥ý´Åý--ð'ÿÿ---þ+þ	ú"-%þþ#--ð'ÿÿ--þõëýà	ú"-ëýíøýà--ð'ÿÿ--íýÌ¿ý	ú"-åý¿ýÄ--ð'ÿÿ-- ý³ý	ú"-ý«ý--ð'ÿÿ--ývrý`	ú"-ýnrý`--ð'ÿÿ--zýh]ýK	ú"-rý`]ýK--ð'ÿÿ--eýSMý1	ú"-]ýKMý1--ð'ÿÿ--@9À	ú"-Mý1Dý--ð'ÿÿ--@Àö	ú"-DýDýô--ð'ÿÿ--@þÀÙ	ú"-DýöKýÙ--ð'ÿÿ--cýáKý¾	ú"-KýÙ[ý¾--ð'ÿÿ--xýÆ[ý©	ú"-[ý¾pý©--ð'ÿÿ--ý±pý	ú"-pý©ý--ð'ÿÿ--°ý@ýÀ	ú"-ý¨ý--ð'ÿÿ--Îý@¨ýÀ	ú"-¦ýÈý--ð'ÿÿ--ëý@ÆýÀ	ú"-Æýãý--ð'ÿÿ--þµãý	ú"-ãýýý­--ð'ÿÿ--'þæþÃ	ú"-þÃþÞ--ð'ÿÿ--@ÀÞ	ú"-þÞ%þü--ð'ÿÿ--@#Àü	ú"-%þü#þ--ð'ÿÿ--@@À	ú"-#þþ8--ð'ÿÿ-- þYþ8	ú"-þ8þQ--ð'ÿÿ--þlîýQ	ú"-þQîýd--ð'ÿÿ--öý@ÒýÀ	ú"-îýdÒýq--ð'ÿÿ--Úý@´ýÀ	ú"-Òýq´ýu--ð'ÿÿ--þÜøýÓ	ú"-ùýÓøýÔ--ð'ÿÿ--þ@õýÀ	ú"-úýÔóýÔ--ð'ÿÿ--ýýÜóýÓ	ú"-õýÔóýÓ--ð'ÿÿ--ûý@ðýÀ	ú"-óýÓðýÒ--ð'ÿÿ--øýÚîýÐ	ú"-ðýÒîýÐ--ð'ÿÿ--öýØìýÎ	ú"-îýÐìýÎ--ð'ÿÿ--ôýÖêýË	ú"-ìýÎêýË--ð'ÿÿ--òýÓéýÉ	ú"-êýËéýÉ--ð'ÿÿ--@ÑÀÆ	ú"-éýËéýÄ--ð'ÿÿ--@ÎÀÄ	ú"-éýÈéýÂ--ð'ÿÿ--òýÌéýÂ	ú"-éýÄêýÂ--ð'ÿÿ--ý@ýÀ	ú"-ýiýi--ð'ÿÿ--ýqýh	ú"-ýiýh--ð'ÿÿ--¡ý@ýÀ	ú"-ýhýh--ð'ÿÿ--¤ý@ýÀ	ú"-ýhýh--ð'ÿÿ--§ý@ýÀ	ú"-ýh¡ýh--ð'ÿÿ--«ý@ýÀ	ú"-ýh£ýi--ð'ÿÿ--®ý@£ýÀ	ú"-¡ýi¨ýi--ð'ÿÿ--±ý@¦ýÀ	ú"-¦ýi©ýj--ð'ÿÿ--³ýs©ýj	ú"-©ýj«ýk--ð'ÿÿ--´ýu«ýk	ú"-«ýk¬ým--ð'ÿÿ--µýv¬ým	ú"-¬ým­ýn--ð'ÿÿ--Óý¨©ý~	ú"-©ý Ëý~--ð'ÿÿ--¯ýzýL	ú"-§ýLýr--ð'ÿÿ--pýYMý7	ú"-MýQhý7--ð'ÿÿ--ÙýÄ¶ý¢	ú"-Ñý¢¶ý¼--ð'ÿÿ--Äýýb	ú"-ý¼ýb--ð'ÿÿ--ýgjý=	ú"-ý=jý_--ð'ÿÿ--5ýW%ýG	ú"-%ýO-ýG--ð'ÿÿ--ný@KýÀ	ú"-fýKý--ð'ÿÿ--Sý@1ýÀ	ú"-Ký1ýý--ð'ÿÿ--9ýýì	ú"-1ýýýì--ð'ÿÿ--#ýôýÖ	ú"-ýìýÖ--ð'ÿÿ--@ÞÀ¼	ú"-ýÖÿü¼--ð'ÿÿ--@ÄÀ¡	ú"-ÿü¼üü¡--ð'ÿÿ--@©À	ú"-üü¡ÿü--ð'ÿÿ--@Àl	ú"-ÿüýl--ð'ÿÿ--#ýtýU	ú"-ýlýU--ð'ÿÿ--9ý]ýE	ú"-ýU1ýE--ð'ÿÿ--Sý@1ýÀ	ú"-1ýEKý:--ð'ÿÿ--ný@KýÀ	ú"-Ký:fý6--ð'ÿÿ--ý@fýÀ	ú"-fý6ý:--ð'ÿÿ--¤ý@ýÀ	ú"-ý:ýE--ð'ÿÿ--¹ý]ýE	ú"-ýE±ýU--ð'ÿÿ--Êýt±ýU	ú"-±ýUÂýl--ð'ÿÿ--@Àl	ú"-ÂýlÍý--ð'ÿÿ--@©À	ú"-ÍýÑý¡--ð'ÿÿ--@ÄÀ¡	ú"-Ñý¡Íý¼--ð'ÿÿ--@ÞÀ¼	ú"-Íý¼ÂýÖ--ð'ÿÿ--Êýô±ýÖ	ú"-ÂýÖ±ýì--ð'ÿÿ--¹ýýì	ú"-±ýìýý--ð'ÿÿ--¤ý@ýÀ	ú"-ýýý--ð'ÿÿ--ý@fýÀ	ú"-ýfý--ð'ÿÿ--íþ*Ãþ	ú"-Ãþ"åþ--ð'ÿÿ--ÉþüþÏ	ú"-ÁþÏþô--ð'ÿÿ--þÜgþ¸	ú"-gþÔþ¸--ð'ÿÿ--óþGÑþ%	ú"-ëþ%Ñþ?--ð'ÿÿ--Þþ±þä	ú"-±þ	Öþä--ð'ÿÿ--®þêþÀ	ú"-¦þÀþâ--ð'ÿÿ--OþÙ?þÉ	ú"-?þÑGþÉ--ð'ÿÿ--þ@dþÀ	ú"-þdþ--ð'ÿÿ--lþ@HþÀ	ú"-dþHþ--ð'ÿÿ--Pþ2þk	ú"-Hþ2þk--ð'ÿÿ--:þs!þR	ú"-2þk!þR--ð'ÿÿ--XþÝ9þÅ	ú"-9þÕPþÅ--ð'ÿÿ--qþ@PþÀ	ú"-PþÅiþ»--ð'ÿÿ--þ@iþÀ	ú"-iþ»þ¹--ð'ÿÿ--§þ@þÀ	ú"-þ¹þ½--ð'ÿÿ--Áþ@þÀ	ú"-þ½¹þÉ--ð'ÿÿ--Öþâ¹þÉ	ú"-¹þÉÎþÚ--ð'ÿÿ--æþøÎþÚ	ú"-ÎþÚÞþð--ð'ÿÿ--@Àð	ú"-Þþðèþ--ð'ÿÿ--@-À	ú"-èþëþ%--ð'ÿÿ--@HÀ%	ú"-ëþ%çþ@--ð'ÿÿ--@aÀ@	ú"-çþ@ÜþY--ð'ÿÿ--äþwËþY	ú"-ÜþYËþo--ð'ÿÿ--Óþµþo	ú"-Ëþoµþ--ð'ÿÿ--½þ@þÀ	ú"-µþþ--ð'ÿÿ--£þ@þÀ	ú"-þþ--ð'ÿÿ--]þ@RþÀ	ú"-RþUþ--ð'ÿÿ--_þUþ	ú"-UþWþ--ð'ÿÿ--`þWþ	ú"-WþXþ--ð'ÿÿ--@!À	ú"-XþYþ--ð'ÿÿ--@$À	ú"-YþZþ--ð'ÿÿ--bþ&Yþ	ú"-ZþYþ--ð'ÿÿ--@)À	ú"-YþXþ!--ð'ÿÿ--`þ+Wþ!	ú"-Xþ!Wþ#--ð'ÿÿ--_þ-Tþ#	ú"-Wþ#Tþ%--ð'ÿÿ--/Rþ%	ú"-Tþ%Rþ'--ð'ÿÿ--Zþ@OþÀ	ú"-Tþ'Mþ'--ð'ÿÿ--üGmü	ú"-mü?ü--ð'ÿÿ--tüFüì	ú"-lüìFü--ð'ÿÿ--5üùüÖ	ú"-üñ-üÖ--ð'ÿÿ--üdüB	ú"-üBü--ð'ÿÿ--ü/[ü	ú"-[ü'ü--ð'ÿÿ--Xü.üÝ	ú"-PüÝ.üÿ--ð'ÿÿ--úû÷éûç	ú"-éûïòûç--ð'ÿÿ--3ü@üÀ	ú"-+ü«ü§--ð'ÿÿ--ü@õûÀ	ú"-ü§õû--ð'ÿÿ--ýû¤àû	ú"-õûàû--ð'ÿÿ--èûÎûu	ú"-àûÎûu--ð'ÿÿ--@À[	ú"-ÎûuÄû[--ð'ÿÿ--@cÀ@	ú"-Äû[Àû@--ð'ÿÿ--@HÀ%	ú"-Àû@Äû%--ð'ÿÿ--@-À	ú"-Äû%Ïû--ð'ÿÿ--èûÏûõ	ú"-Ïûàûõ--ð'ÿÿ--þûýàûä	ú"-àûõöûä--ð'ÿÿ--ü@öûÀ	ú"-öûäüÙ--ð'ÿÿ--4ü@üÀ	ú"-üÙ,üÖ--ð'ÿÿ--Oü@,üÀ	ú"-,üÖGüÚ--ð'ÿÿ--iü@GüÀ	ú"-GüÚaüå--ð'ÿÿ--üþaüå	ú"-aüåwüö--ð'ÿÿ--üwüö	ú"-wüöü--ð'ÿÿ--@.À	ú"-üü&--ð'ÿÿ--@JÀ&	ú"-ü&üB--ð'ÿÿ--@eÀB	ú"-üBü]--ð'ÿÿ--üoü	ú"-üoü--ð'ÿÿ--wü¨Zü	ú"-oüZü --ð'ÿÿ--bü@CüÀ	ú"-Zü Cü¨--ð'ÿÿ--Kü@+üÀ	ú"-Cü¨+ü«--ð'ÿÿ--@Ày	ú"-ü|üw--ð'ÿÿ--@Àw	ú"-üüu--ð'ÿÿ--üüu	ú"-üwüu--ð'ÿÿ--üüs	ú"-üuüs--ð'ÿÿ--üüo	ú"-üsüo--ð'ÿÿ--üwüm	ú"-üoüm--ð'ÿÿ--üuüi	ú"-ümüi--ð'ÿÿ--üqüg	ú"-üiüg--ð'ÿÿ--üoüe	ú"-ügüe--ð'ÿÿ--ümüc	ú"-üeüc--ð'ÿÿ--ü@üÀ	ú"-ücüc--ð'ÿÿ--)þ¼ÿþýÿ	ú"-þý´ÿ!þÿ--ð'ÿÿ--þÿØý^ÿ	ú"-þ^ÿØýÿ--ð'ÿÿ--Îýkÿ¦ýCÿ	ú"-¦ýcÿÆýCÿ--ð'ÿÿ--.þÚÿþ·ÿ	ú"-&þ·ÿþÒÿ--ð'ÿÿ--þ£ÿíýtÿ	ú"-íýÿþtÿ--ð'ÿÿ--ïýzÿÁýMÿ	ú"-çýMÿÁýrÿ--ð'ÿÿ--¢ýaÿýEÿ	ú"-ýYÿýEÿ--ð'ÿÿ--¾ý@ýÀ	ú"-¶ý#ý --ð'ÿÿ-- ý@ýÀ	ú"-ý ý--ð'ÿÿ--ýeý	ú"-ýeý--ð'ÿÿ--mýSýëÿ	ú"-eýSýëÿ--ð'ÿÿ--@óÿÀÏÿ	ú"-SýëÿHýÏÿ--ð'ÿÿ--@×ÿÀ²ÿ	ú"-HýÏÿDý²ÿ--ð'ÿÿ--@ºÿÀÿ	ú"-Dý²ÿHýÿ--ð'ÿÿ--@ÿÀzÿ	ú"-HýÿSýzÿ--ð'ÿÿ--ýrÿ_ýVÿ	ú"-_ýjÿuýVÿ--ð'ÿÿ--ý^ÿuýHÿ	ú"-uýVÿýHÿ--ð'ÿÿ--µý@ýÀ	ú"-ýHÿ­ýBÿ--ð'ÿÿ--Ôý@­ýÀ	ú"-­ýBÿÌýDÿ--ð'ÿÿ--ðý@ÌýÀ	ú"-ÌýDÿèýMÿ--ð'ÿÿ--	þfÿèýMÿ	ú"-èýMÿþ^ÿ--ð'ÿÿ--þ~ÿþ^ÿ	ú"-þ^ÿþvÿ--ð'ÿÿ--@ÿÀvÿ	ú"-þvÿ!þÿ--ð'ÿÿ--@¶ÿÀÿ	ú"-!þÿ&þ®ÿ--ð'ÿÿ--@ÔÿÀ®ÿ	ú"-&þ®ÿ$þÌÿ--ð'ÿÿ--@ðÿÀÌÿ	ú"-$þÌÿþèÿ--ð'ÿÿ--!þ	þèÿ	ú"-þèÿþ--ð'ÿÿ--þïý	ú"-þïý--ð'ÿÿ--÷ý@ÓýÀ	ú"-ïýÓý--ð'ÿÿ--Ûý@¶ýÀ	ú"-Óý¶ý#--ð'ÿÿ--eývÿlÿ	ú"-]ýlÿnÿ--ð'ÿÿ--dýyÿYýnÿ	ú"-nÿYýqÿ--ð'ÿÿ--aýÿXýqÿ	ú"-YýqÿXýsÿ--ð'ÿÿ--`ý~ÿVýsÿ	ú"-XýsÿVývÿ--ð'ÿÿ--@ÿÀvÿ	ú"-VývÿUýyÿ--ð'ÿÿ--ÒüÎþ§ü£þ	ú"-§üÆþÊü£þ--ð'ÿÿ--±ü þüpþ	ú"-©üpþüþ--ð'ÿÿ--wüþOüUþ	ú"-OüuþoüUþ--ð'ÿÿ--×üìþ´üÉþ	ú"-ÏüÉþ´üäþ--ð'ÿÿ--Åü¶þüþ	ú"-ü®þ½üþ--ð'ÿÿ--üþjü_þ	ú"-ü_þjüþ--ð'ÿÿ--Jüsþ.üWþ	ú"-.ükþBüWþ--ð'ÿÿ--fü@?üÀ	ú"-^ü6ÿ?ü1ÿ--ð'ÿÿ--Gü@!üÀ	ú"-?ü1ÿ!ü$ÿ--ð'ÿÿ--)ü,ÿ	üÿ	ú"-!ü$ÿ	üÿ--ð'ÿÿ--üÿøûõþ	ú"-	üÿøûõþ--ð'ÿÿ--@àþÀºþ	ú"-ïûØþîûºþ--ð'ÿÿ--@ÂþÀþ	ú"-îûºþôûþ--ð'ÿÿ--ü¥þôûþ	ú"-ôûþüþ--ð'ÿÿ--üþülþ	ú"-üþülþ--ð'ÿÿ--:ütþü]þ	ú"-ülþ2ü]þ--ð'ÿÿ--Wü@2üÀ	ú"-2ü]þOüUþ--ð'ÿÿ--uü@OüÀ	ú"-MüUþoüUþ--ð'ÿÿ--ü@müÀ	ú"-müUþü--ð'ÿÿ--¬ütþü	ú"-ü¤ülþ--ð'ÿÿ--Áüþ¤ülþ	ú"-¤ülþ¹üþ--ð'ÿÿ--Ðü¤þ¹üþ	ú"-¹üþÈüþ--ð'ÿÿ--@ÁþÀþ	ú"-ÈüþÏü¹þ--ð'ÿÿ--@ßþÀ¹þ	ú"-Ïü¹þÎü×þ--ð'ÿÿ--@ýþÀ×þ	ú"-Îü×þÄüõþ--ð'ÿÿ--¶ü.ÿüÿ	ú"-®üÿü&ÿ--ð'ÿÿ--ü@üÀ	ú"-ü&ÿü2ÿ--ð'ÿÿ--ü@^üÀ	ú"-ü2ÿ^ü6ÿ--ð'ÿÿ--@ÿÀÿ	ú"-³üÿ³üÿ--ð'ÿÿ--¼üÿ³üÿ	ú"-³üÿ´üÿ--ð'ÿÿ--½üÿ´üÿ	ú"-´üÿµüÿ--ð'ÿÿ--¾üÿµüÿ	ú"-µüÿ¶üÿ--ð'ÿÿ--Àüÿ¶üÿ	ú"-¶üÿ¸üÿ--ð'ÿÿ--Âüÿ¸üÿ	ú"-¸üÿºüÿ--ð'ÿÿ--Äüÿºüÿþ	ú"-ºüÿ¼üÿþ--ð'ÿÿ--Æüÿ¼üýþ	ú"-¼üÿþ¾üýþ--ð'ÿÿ--Èüÿ¾üûþ	ú"-¾üýþÀüûþ--ð'ÿÿ--ÉüÿÀüúþ	ú"-ÀüûþÁüúþ--ð'ÿÿ--@ÿÀùþ	ú"-ÁüüþÁü÷þ--ð'ÿÿ--ü@üÀ	ú"-üÒþüÒþ--ð'ÿÿ--üÛþüÒþ	ú"-üÒþüÓþ--ð'ÿÿ--üÝþüÓþ	ú"-üÓþüÕþ--ð'ÿÿ--üßþüÕþ	ú"-üÕþü×þ--ð'ÿÿ--üáþü×þ	ú"-ü×þüÙþ--ð'ÿÿ--@äþÀÙþ	ú"-üÙþüÜþ--ð'ÿÿ--@çþÀÜþ	ú"-üÜþüßþ--ð'ÿÿ--@êþÀßþ	ú"-üßþüâþ--ð'ÿÿ--@íþÀâþ	ú"-üàþüçþ--ð'ÿÿ--üîþüåþ	ú"-üåþüæþ--ð'ÿÿ--üðþüæþ	ú"-üæþüèþ--ð'ÿÿ--üýqüUý	ú"-qüyýüUý--ð'ÿÿ--üQýKü!ý	ú"-sü!ýKüIý--ð'ÿÿ--Aü/ýüý	ú"-ü'ý9üý--ð'ÿÿ--¡üý~üý	ú"-üý~üý--ð'ÿÿ--ügý`ü8ý	ú"-`ü_ýü8ý--ð'ÿÿ--bü>ý4üý	ú"-Züý4ü6ý--ð'ÿÿ--ü%ýøûý	ú"-øûýüý--ð'ÿÿ--0ü@üÀ	ú"-(üçýüãý--ð'ÿÿ--ü@òûÀ	ú"-üãýòûÙý--ð'ÿÿ--úûáýÛûÉý	ú"-òûÙýÛûÉý--ð'ÿÿ--ãûÑýÉû³ý	ú"-ÛûÉýÉû³ý--ð'ÿÿ--@»ýÀý	ú"-Éû³ý½ûý--ð'ÿÿ--@¡ýÀ~ý	ú"-½ûý¸û~ý--ð'ÿÿ--@ýÀaý	ú"-¸û~ý¹ûaý--ð'ÿÿ--@iýÀFý	ú"-¹ûaýÂûFý--ð'ÿÿ--ïû5ýÒûý	ú"-Òû-ýçûý--ð'ÿÿ--	ü"ýçûý	ú"-çûýüý--ð'ÿÿ--'ü@üÀ	ú"-üýüý--ð'ÿÿ--Dü@üÀ	ú"-üý<üý--ð'ÿÿ--`ü@<üÀ	ú"-<üýXüý--ð'ÿÿ--yü(ýXüý	ú"-Xüýqü ý--ð'ÿÿ--ü=ýqü ý	ú"-qü ýü5ý--ð'ÿÿ--üWýü5ý	ú"-ü5ýüOý--ð'ÿÿ--@týÀOý	ú"-üOýülý--ð'ÿÿ--@ýÀlý	ú"-ülýüý--ð'ÿÿ--@®ýÀý	ú"-üýü¦ý--ð'ÿÿ--üÇýü¦ý	ú"-ü¦ýü¿ý--ð'ÿÿ--üÛýiü¿ý	ú"-ü¿ýiüÓý--ð'ÿÿ--qüèýOüÓý	ú"-iüÓýOüàý--ð'ÿÿ--@ÑýÀÇý	ú"-*üËý*üÅý--ð'ÿÿ--4üÏý*üÅý	ú"-*üÇý,üÅý--ð'ÿÿ--5üÍý,üÃý	ú"-,üÅý-üÃý--ð'ÿÿ--8üËý-üÁý	ú"--üÃý0üÁý--ð'ÿÿ--;ü@0üÀ	ú"-.üÁý5üÁý--ð'ÿÿ-->ü@3üÀ	ú"-3üÁý6üÀý--ð'ÿÿ--Aü@6üÀ	ú"-4üÀý;üÀý--ð'ÿÿ--CüÉý9üÀý	ú"-9üÀý;üÁý--ð'ÿÿ--Fü@;üÀ	ú"-;üÁý>üÂý--ð'ÿÿ--HüËý>üÂý	ú"->üÂý@üÃý--ð'ÿÿ--@ÎýÀÃý	ú"-@üÃýAüÆý--ð'ÿÿ--@MýÀ5ý	ú"-Ìû3ýÌûGý--ð'ÿÿ--Ôû>ýËû5ý	ú"-Ìû5ýËû6ý--ð'ÿÿ--@@ýÀ6ý	ú"-Ëû4ýËû:ý--ð'ÿÿ--ÓûAýÉû8ý	ú"-Ëû8ýÉû9ý--ð'ÿÿ--ÑûCýÈû9ý	ú"-Éû9ýÈû;ý--ð'ÿÿ--ÐûEýÇû;ý	ú"-Èû;ýÇû=ý--ð'ÿÿ--@HýÀ=ý	ú"-Çû=ýÆû@ý--ð'ÿÿ--ÎûIýÅû@ý	ú"-Æû@ýÅûAý--ð'ÿÿ--ÍûLýÃûAý	ú"-ÅûAýÃûDý--ð'ÿÿ--@MýÀDý	ú"-ÃûBýÃûGý--ð'ÿÿ--ËûNýÂûEý	ú"-ÃûEýÂûFý--ð'ÿÿ--@^ýÀFý	ú"-ÂûDýÂûXý--ð'ÿÿ--Úýý¯ýßü	ú"-¯ýýÒýßü--ð'ÿÿ--¸ýÛüý«ü	ú"-°ý«üýÓü--ð'ÿÿ--~ý¸üVýü	ú"-Vý°üvýü--ð'ÿÿ--ßý'ý¼ýý	ú"-×ýý¼ýý--ð'ÿÿ--ÌýñüýÁü	ú"-ýéüÄýÁü--ð'ÿÿ--ýÈüqýü	ú"-ýüqýÀü--ð'ÿÿ--Rý®ü5ýü	ú"-5ý¦üJýü--ð'ÿÿ--mý@IýÀ	ú"-eýqýIýmý--ð'ÿÿ--Qý@-ýÀ	ú"-Iýmý-ýaý--ð'ÿÿ--5ýiýýOý	ú"--ýaýýOý--ð'ÿÿ--ýWýý8ý	ú"-ýOýý8ý--ð'ÿÿ--@ýÀöü	ú"-öüýõüöü--ð'ÿÿ--@þüÀÙü	ú"-õüöüüüÙü--ð'ÿÿ--ýáüüü¿ü	ú"-üüÙü	ý¿ü--ð'ÿÿ--%ýÇü	ý©ü	ú"-	ý¿üý©ü--ð'ÿÿ-->ý±üýü	ú"-ý©ü6ýü--ð'ÿÿ--Zý@6ýÀ	ú"-6ýüRýü--ð'ÿÿ--xý@RýÀ	ú"-Rýüpýü--ð'ÿÿ--ý@pýÀ	ú"-pýüýü--ð'ÿÿ--®ý«üýü	ú"-ýü¦ý£ü--ð'ÿÿ--Äý¿ü¦ý£ü	ú"-¦ý£ü¼ý·ü--ð'ÿÿ--ÔýØü¼ý·ü	ú"-¼ý·üÌýÐü--ð'ÿÿ--@ôüÀÐü	ú"-ÌýÐüÕýìü--ð'ÿÿ--@ýÀìü	ú"-ÕýìüÖýý--ð'ÿÿ--@.ýÀý	ú"-ÖýýÐý&ý--ð'ÿÿ--ÏýWý¶ý8ý	ú"-Çý8ý¶ýOý--ð'ÿÿ--¾ýiýýOý	ú"-¶ýOýýaý--ð'ÿÿ--¦ý@ýÀ	ú"-ýaýýmý--ð'ÿÿ--ý@eýÀ	ú"-ýmýeýqý--ð'ÿÿ--@@ýÀ5ý	ú"-Èý8ýÉý5ý--ð'ÿÿ--Óý=ýÉý2ý	ú"-Éý5ýËý2ý--ð'ÿÿ--@:ýÀ/ý	ú"-Ëý2ýÌý/ý--ð'ÿÿ--@7ýÀ,ý	ú"-Ìý/ýÍý,ý--ð'ÿÿ--×ý4ýÍý*ý	ú"-Íý,ýÏý*ý--ð'ÿÿ--ý@ýÀ	ú"-ýýýý--ð'ÿÿ--!ý@ýÀ	ú"-ýýýý--ð'ÿÿ--#ýýýý	ú"-ýýýý--ð'ÿÿ--%ýýýý	ú"-ýýýý--ð'ÿÿ--'ý!ýýý	ú"-ýýýý--ð'ÿÿ--(ý#ýýý	ú"-ýý ýý--ð'ÿÿ--@&ýÀý	ú"- ýý!ýý--ð'ÿÿ--@)ýÀý	ú"-!ýý!ý#ý--ð'ÿÿ--)ý,ýý!ý	ú"-!ý!ýý$ý--ð'ÿÿ--'ý.ýý$ý	ú"-ý$ýý&ý--ð'ÿÿ--&ý/ýý&ý	ú"-ý&ýý'ý--ð'ÿÿ--Rÿ¾ý'ÿý	ú"-'ÿ¶ýJÿý--ð'ÿÿ--1ÿýÿ_ý	ú"-)ÿ_ýÿý--ð'ÿÿ--÷þmýÏþEý	ú"-ÏþeýïþEý--ð'ÿÿ--WÿÜý4ÿ¹ý	ú"-Oÿ¹ý4ÿÔý--ð'ÿÿ--Eÿ¥ýÿvý	ú"-ÿý=ÿvý--ð'ÿÿ--ÿ|ýéþNý	ú"-ÿNýéþtý--ð'ÿÿ--Êþcý®þGý	ú"-®þ[ýÂþGý--ð'ÿÿ--æþ@ÁþÀ	ú"-Þþ%þÁþ!þ--ð'ÿÿ--Éþ@¦þÀ	ú"-Áþ!þ¦þþ--ð'ÿÿ--®þþþþ	ú"-¦þþþþ--ð'ÿÿ--þþþíý	ú"-þþþíý--ð'ÿÿ--@õýÀÒý	ú"-þíýqþÒý--ð'ÿÿ--@ÚýÀ´ý	ú"-qþÒýmþ´ý--ð'ÿÿ--@¼ýÀý	ú"-mþ´ýqþý--ð'ÿÿ--þýþ]ý	ú"-þsýþ]ý--ð'ÿÿ--¸þeýþMý	ú"-þ]ý°þMý--ð'ÿÿ--Õþ@°þÀ	ú"-°þMýÍþEý--ð'ÿÿ--óþ@ÍþÀ	ú"-ÍþEýëþDý--ð'ÿÿ--ÿ@ëþÀ	ú"-ëþDýÿKý--ð'ÿÿ--+ÿbýÿKý	ú"-ÿKý#ÿZý--ð'ÿÿ--@ÿwý#ÿZý	ú"-#ÿZý8ÿoý--ð'ÿÿ--Oÿý8ÿoý	ú"-8ÿoýGÿý--ð'ÿÿ--@¯ýÀý	ú"-GÿýNÿ§ý--ð'ÿÿ--@ÎýÀ§ý	ú"-Nÿ¥ýNÿÈý--ð'ÿÿ--@êýÀÆý	ú"-NÿÆýEÿâý--ð'ÿÿ--Mÿþ5ÿâý	ú"-Eÿâý5ÿüý--ð'ÿÿ--=ÿþÿüý	ú"-5ÿüýÿþ--ð'ÿÿ--ÿ@ÞþÀ	ú"-ÿþÞþ%þ--ð'ÿÿ--ÿþþþþ	ú"-ÿþþþþþ--ð'ÿÿ--ÿþþþ	þ	ú"-þþþÿþ	þ--ð'ÿÿ--ÿþÿþþ	ú"-ÿþ	þÿþ--ð'ÿÿ--ÿþÿþ	ú"-ÿþÿþ--ð'ÿÿ--ÿþÿþ	ú"-ÿþÿþ--ð'ÿÿ--ÿþÿþ	ú"-ÿþÿþ--ð'ÿÿ--ÿ@ÿÀ	ú"-ÿþÿþ--ð'ÿÿ--ÿ@ÿÀ	ú"-	ÿþÿþ--ð'ÿÿ--ÿ@ÿÀ	ú"-ÿþÿþ--ð'ÿÿ--ÿ@ÿÀ	ú"-ÿþÿþ--ð'ÿÿ--ÿþÿþ	ú"-ÿþÿþ--ð'ÿÿ--@ýÀxý	ú"-þvýþý--ð'ÿÿ--@ýÀyý	ú"-þwýþý--ð'ÿÿ--þý~þý	ú"-þý~þý--ð'ÿÿ--@ýÀý	ú"-~þýþý--ð'ÿÿ--þýþý	ú"-þýþý--ð'ÿÿ--@ýÀý	ú"-þýzþý--ð'ÿÿ--þýxþý	ú"-zþýxþý--ð'ÿÿ--@ýÀý	ú"-xþýwþý--ð'ÿÿ--þýuþý	ú"-wþýuþý--ð'ÿÿ--þýtþý	ú"-uþýtþý--ð'ÿÿ--@§ýÀý	ú"-tþýtþ¡ý--ð'ÿÿ--öú@ÙúÀ	ú"-îúýÙúÿü--ð'ÿÿ--áúýÇúõü	ú"-ÙúÿüÇúõü--ð'ÿÿ--Ïúýü¸úçü	ú"-Çúõü¸úçü--ð'ÿÿ--@ïüÀÔü	ú"-¸úçü¯úÔü--ð'ÿÿ--@ÜüÀÀü	ú"-¯úÔü«úÀü--ð'ÿÿ--@ÈüÀ¬ü	ú"-«úÀü¯ú¬ü--ð'ÿÿ--@´üÀü	ú"-¯ú¬ü¸úü--ð'ÿÿ--Îú¡ü¸úü	ú"-¸úüÆúü--ð'ÿÿ--àúüÆúü	ú"-ÆúüØúü--ð'ÿÿ--õú@ØúÀ	ú"-Øúüíúü--ð'ÿÿ--	û@íúÀ	ú"-íúüûü--ð'ÿÿ--û@ûÀ	ú"-ûüûü--ð'ÿÿ--+ûüûü	ú"-ûü#ûü--ð'ÿÿ--@²üÀü	ú"-#ûü,ûªü--ð'ÿÿ--@ÆüÀªü	ú"-,ûªü0û¾ü--ð'ÿÿ--@ÚüÀ¾ü	ú"-0û¾ü-ûÒü--ð'ÿÿ--(ûýûëü	ú"- ûëüûøü--ð'ÿÿ--û@ûÀ	ú"-ûøüûÿü--ð'ÿÿ--û@îúÀ	ú"-ûÿüîúý--ð'ÿÿ--*ûñü!ûèü	ú"-!ûéü"ûèü--ð'ÿÿ--+ûðü"ûçü	ú"-"ûèü#ûçü--ð'ÿÿ--,ûïü#ûåü	ú"-#ûçü$ûåü--ð'ÿÿ--.ûíü$ûâü	ú"-$ûåü&ûâü--ð'ÿÿ--@êüÀßü	ú"-&ûâü'ûßü--ð'ÿÿ--1ûçü'ûÝü	ú"-'ûßü)ûÝü--ð'ÿÿ--@åüÀÚü	ú"-)ûÝü*ûÚü--ð'ÿÿ--3ûâü*ûÙü	ú"-*ûÚü+ûÙü--ð'ÿÿ--4ûáü+ûØü	ú"-+ûÙü,ûØü--ð'ÿÿ--cû<ÿ8ûÿ	ú"-8û4ÿ[ûÿ--ð'ÿÿ--õúëþàúÕþ	ú"-àúãþíúÕþ--ð'ÿÿ--hûZÿEû7ÿ	ú"-`û7ÿEûRÿ--ð'ÿÿ--Vû$ÿ'ûõþ	ú"-'ûÿNûõþ--ð'ÿÿ--Ûúáþ¿úÅþ	ú"-¿úÙþÓúÅþ--ð'ÿÿ--Úú@·úÀ	ú"-Òúÿ·úÿ--ð'ÿÿ--¿úÿúÿ	ú"-·úÿúÿ--ð'ÿÿ--§úÿúkÿ	ú"-úÿúkÿ--ð'ÿÿ--@sÿÀPÿ	ú"-úkÿúPÿ--ð'ÿÿ--@XÿÀ2ÿ	ú"-úPÿ~ú2ÿ--ð'ÿÿ--@:ÿÀÿ	ú"-~ú2ÿúÿ--ð'ÿÿ--@ÿÀúþ	ú"-úÿúúþ--ð'ÿÿ--§úÿúâþ	ú"-úúþúâþ--ð'ÿÿ--¿úêþúÐþ	ú"-úâþ·úÐþ--ð'ÿÿ--Úú@·úÀ	ú"-·úÐþÒúÅþ--ð'ÿÿ--@ÿÀñþ	ú"-LûñþYûÿ--ð'ÿÿ--@1ÿÀÿ	ú"-Yûÿ`û)ÿ--ð'ÿÿ--@NÿÀ)ÿ	ú"-`û)ÿ_ûFÿ--ð'ÿÿ--@jÿÀFÿ	ú"-_ûFÿUûbÿ--ð'ÿÿ--]ûÿFûbÿ	ú"-UûbÿFûÿ--ð'ÿÿ--Nûÿ0ûÿ	ú"-Fûÿ0ûÿ--ð'ÿÿ--8û¥ÿûÿ	ú"-0ûÿûÿ--ð'ÿÿ--û@ùúÀ	ú"-ûÿùú£ÿ--ð'ÿÿ--äú¨ÿÛúÿ	ú"-Ûú ÿÜúÿ--ð'ÿÿ--åú@ÜúÀ	ú"-Úúÿßúÿ--ð'ÿÿ--èú@ÝúÀ	ú"-Ûúÿâúÿ--ð'ÿÿ--ëú@àúÀ	ú"-Þúÿåúÿ--ð'ÿÿ--îú@ãúÀ	ú"-áúÿèúÿ--ð'ÿÿ--òú@æúÀ	ú"-äúÿìúÿ--ð'ÿÿ--õú@êúÀ	ú"-êúÿíú ÿ--ð'ÿÿ--øú@íúÀ	ú"-ëú ÿòú ÿ--ð'ÿÿ--úú@ðúÀ	ú"-îú ÿôú ÿ--ð'ÿÿ--üú©ÿòú ÿ	ú"-òú ÿôú¡ÿ--ð'ÿÿ--@ªÿÀ¡ÿ	ú"-ôúÿôú¤ÿ--ð'ÿÿ--@ÿÀÿ	ú"-ûÿû	ÿ--ð'ÿÿ--û@ûÀ	ú"-û	ÿûÿ--ð'ÿÿ--ûÿûÿ	ú"-ûÿûÿ--ð'ÿÿ--û@ûÀ	ú"-ûÿûÿ--ð'ÿÿ--û@ûÀ	ú"-ûÿûÿ--ð'ÿÿ--ûÿþúÿ	ú"-ûÿþúÿ--ð'ÿÿ--û@ûúÀ	ú"-þúÿûú	ÿ--ð'ÿÿ--ûÿùúÿ	ú"-ûú	ÿùúÿ--ð'ÿÿ--ûÿøúÿ	ú"-ùúÿøúÿ--ð'ÿÿ--@ÿÀÿ	ú"-øúÿøúÿþ--ð'ÿÿ--@	ÿÀþþ	ú"-øúÿøúüþ--ð'ÿÿ--Ðù¬þ¦ùþ	ú"-¦ù¤þÈùþ--ð'ÿÿ--¬ù~þùQþ	ú"-¤ùQþùvþ--ð'ÿÿ--nù^þJù;þ	ú"-JùVþfù;þ--ð'ÿÿ--ÖùÉþ´ù§þ	ú"-Îù§þ´ùÁþ--ð'ÿÿ--Âùþùfþ	ú"-ùþºùfþ--ð'ÿÿ--ùlþgùBþ	ú"-ùBþgùdþ--ð'ÿÿ--3ù"ùKþ	ú"-"ùTþ+ùKþ--ð'ÿÿ--kù@HùÀ	ú"-cùÿHùÿ--ð'ÿÿ--Pù@/ùÀ	ú"-Hùÿ/ùÿ--ð'ÿÿ--7ùÿùñþ	ú"-/ùÿùñþ--ð'ÿÿ--!ùùþùÜþ	ú"-ùñþùÜþ--ð'ÿÿ--@äþÀÃþ	ú"-ùÜþýøÃþ--ð'ÿÿ--@ËþÀ¨þ	ú"-ýøÃþùø¨þ--ð'ÿÿ--@°þÀþ	ú"-ùø¨þüøþ--ð'ÿÿ--@þÀsþ	ú"-üøþùsþ--ð'ÿÿ--ùþù]þ	ú"-ùsþù]þ--ð'ÿÿ--2ùeþùKþ	ú"-ù]þ*ùKþ--ð'ÿÿ--Kù@*ùÀ	ú"-*ùKþCù@þ--ð'ÿÿ--fù@CùÀ	ú"-Cù@þ^ù;þ--ð'ÿÿ--ù@^ùÀ	ú"-^ù;þzù=þ--ð'ÿÿ--ù@zùÀ	ú"-zù=þùFþ--ð'ÿÿ--²ù]þùFþ	ú"-ùFþªùUþ--ð'ÿÿ--ÄùrþªùUþ	ú"-ªùUþ¼ùjþ--ð'ÿÿ--@þÀjþ	ú"-¼ùjþÈùþ--ð'ÿÿ--@¥þÀþ	ú"-ÈùþÎùþ--ð'ÿÿ--@ÀþÀþ	ú"-ÎùþÌù¸þ--ð'ÿÿ--Ëùôþ²ùÕþ	ú"-ÃùÕþ²ùìþ--ð'ÿÿ--ºùÿùìþ	ú"-²ùìþùÿþ--ð'ÿÿ--¤ù@ùÀ	ú"-ùÿþùÿ--ð'ÿÿ--ù@cùÀ	ú"-ùÿcùÿ--ð'ÿÿ--ÅùÚþ¼ùÑþ	ú"-½ùÒþ¼ùÑþ--ð'ÿÿ--@ÙþÀÏþ	ú"-¼ùÓþ¼ùÍþ--ð'ÿÿ--@×þÀÍþ	ú"-¼ùÑþ¼ùËþ--ð'ÿÿ--@ÕþÀÊþ	ú"-¼ùÏþ¼ùÈþ--ð'ÿÿ--@ÒþÀÇþ	ú"-¼ùÊþ½ùÇþ--ð'ÿÿ--@ÏþÀÄþ	ú"-½ùÇþ¾ùÄþ--ð'ÿÿ--@ÌþÀÁþ	ú"-¾ùÄþ¿ùÁþ--ð'ÿÿ--ÉùÉþ¿ù¾þ	ú"-¿ùÁþÁù¾þ--ð'ÿÿ--ËùÆþÁù¼þ	ú"-Áù¾þÃù¼þ--ð'ÿÿ--ÌùÄþÃù»þ	ú"-Ãù¼þÄù»þ--ð'ÿÿ--Íù@ÄùÀ	ú"-Âù»þÇù»þ--ð'ÿÿ--¨ûyþ~ûOþ	ú"-~ûqþ ûOþ--ð'ÿÿ--ûKþWûþ	ú"-|ûþWûCþ--ð'ÿÿ--Eû+þ"ûþ	ú"-"û#þ=ûþ--ð'ÿÿ--®ûþûtþ	ú"-¦ûtþûþ--ð'ÿÿ--û`þlû3þ	ú"-lûXþû3þ--ð'ÿÿ--iû8þ?ûþ	ú"-aûþ?û0þ--ð'ÿÿ--û(þúúþ	ú"-úú þûþ--ð'ÿÿ--Cû@ûÀ	ú"-;ûÜþûØþ--ð'ÿÿ--'û@ûÀ	ú"-ûØþûÎþ--ð'ÿÿ--ûÖþðú½þ	ú"-ûÎþðú½þ--ð'ÿÿ--øúÅþßú§þ	ú"-ðú½þßú§þ--ð'ÿÿ--@¯þÀþ	ú"-ßú§þÔúþ--ð'ÿÿ--@þÀrþ	ú"-ÔúþÑúrþ--ð'ÿÿ--@zþÀVþ	ú"-ÑúrþÔúVþ--ð'ÿÿ--@^þÀ=þ	ú"-ÔúVþßú=þ--ð'ÿÿ--øúEþßú'þ	ú"-ßú=þðú'þ--ð'ÿÿ--û/þðúþ	ú"-ðú'þûþ--ð'ÿÿ--'û@ûÀ	ú"-ûþûþ--ð'ÿÿ--Cû@ûÀ	ú"-ûþ;ûþ--ð'ÿÿ--_û@;ûÀ	ú"-;ûþWûþ--ð'ÿÿ--xû@WûÀ	ú"-Wûþpûþ--ð'ÿÿ--û/þpûþ	ú"-pûþû'þ--ð'ÿÿ--ûEþû'þ	ú"-û'þû=þ--ð'ÿÿ--@^þÀ=þ	ú"-û=þ¢ûVþ--ð'ÿÿ--@zþÀVþ	ú"-¢ûVþ¦ûrþ--ð'ÿÿ--@þÀrþ	ú"-¦ûrþ¢ûþ--ð'ÿÿ--@¯þÀþ	ú"-¢ûþû§þ--ð'ÿÿ--ûÅþû§þ	ú"-û§þû½þ--ð'ÿÿ--ûÖþpû½þ	ú"-û½þpûÎþ--ð'ÿÿ--xû@WûÀ	ú"-pûÎþWûØþ--ð'ÿÿ--_û@;ûÀ	ú"-WûØþ;ûÜþ--ð'ÿÿ-->ûïûÅ	ú"-ûç6ûÅ--ð'ÿÿ--ûÁíú	ú"-ûíú¹--ð'ÿÿ--Ûú¡¸ú~	ú"-¸úÓú~--ð'ÿÿ--Dû!ûê	ú"-<ûê!û--ð'ÿÿ--/û×û©	ú"-ûÏ'û©--ð'ÿÿ--ÿú¯Õú	ú"-÷úÕú§--ð'ÿÿ--¡úú	ú"-úú--ð'ÿÿ--Ùú@¶úÀ	ú"-ÑúR¶úO--ð'ÿÿ--¾ú@úÀ	ú"-¶úOúD--ð'ÿÿ--¤úLú4	ú"-úDú4--ð'ÿÿ--ú<uú	ú"-ú4uú--ð'ÿÿ--@%À	ú"-uúkú--ð'ÿÿ--@Àè	ú"-kúgúè--ð'ÿÿ--@ðÀÍ	ú"-gúèkúÍ--ð'ÿÿ--@ÕÀ³	ú"-kúÍuú³--ð'ÿÿ--ú»uú	ú"-uú³ú--ð'ÿÿ--¤ú¥ú	ú"-úú--ð'ÿÿ--¾ú@úÀ	ú"-ú¶ú--ð'ÿÿ--Ùú@¶úÀ	ú"-¶úÑú--ð'ÿÿ--õú@ÑúÀ	ú"-Ñúíú--ð'ÿÿ--û@íúÀ	ú"-íúû--ð'ÿÿ--%û¥û	ú"-ûû--ð'ÿÿ--5û»û	ú"-û-û³--ð'ÿÿ--@ÕÀ³	ú"--û³8ûÍ--ð'ÿÿ--@ðÀÍ	ú"-8ûÍ<ûè--ð'ÿÿ--@Àè	ú"-<ûè8û--ð'ÿÿ--@%À	ú"-8û-û--ð'ÿÿ--5û<û	ú"--ûû4--ð'ÿÿ--%ûLû4	ú"-û4ûD--ð'ÿÿ--û@íúÀ	ú"-ûDíúO--ð'ÿÿ--õú@ÑúÀ	ú"-íúOÑúR--ð'ÿÿ--ýûXýjû	ú"-Xýû|ýjû--ð'ÿÿ--býfû2ý6û	ú"-Zý6û2ý^û--ð'ÿÿ--)ýCûýû	ú"-ý;û!ýû--ð'ÿÿ--ý³ûeýû	ú"-ýûeý«û--ð'ÿÿ--vý|ûGýMû	ú"-GýtûnýMû--ð'ÿÿ--IýSûý&û	ú"-Aý&ûýKû--ð'ÿÿ--üü:ûßüû	ú"-ßü2ûôüû--ð'ÿÿ--ý@òüÀ	ú"-ýüûòüøû--ð'ÿÿ--úü@×üÀ	ú"-òüøû×üíû--ð'ÿÿ--ßüõûÀüÛû	ú"-×üíûÀüÛû--ð'ÿÿ--Èüãû®üÄû	ú"-ÀüÛû®üÄû--ð'ÿÿ--@ÌûÀ¨û	ú"-®üÄû¢ü¨û--ð'ÿÿ--@°ûÀû	ú"-¢ü¨ûüû--ð'ÿÿ--@ûÀnû	ú"-üû¢ünû--ð'ÿÿ--@vûÀSû	ú"-¢ünû®üSû--ð'ÿÿ--éü=ûÇü$û	ú"-Çü5ûáü$û--ð'ÿÿ--ý@áüÀ	ú"-áü$ûýüû--ð'ÿÿ--$ý@ýüÀ	ú"-ýüûýû--ð'ÿÿ--Aý@ýÀ	ú"-ýû9ý"û--ð'ÿÿ--[ý9û9ý"û	ú"-9ý"ûSý1û--ð'ÿÿ--qýNûSý1û	ú"-Sý1ûiýFû--ð'ÿÿ--ýhûiýFû	ú"-iýFûxý`û--ð'ÿÿ--@ûÀ`û	ú"-xý`ûýû--ð'ÿÿ--@¤ûÀû	ú"-ýûýû--ð'ÿÿ--@ÁûÀû	ú"-ýûwý¹û--ð'ÿÿ--ýÚûgý¹û	ú"-wý¹ûgýÒû--ð'ÿÿ--oýïûQýÒû	ú"-gýÒûQýçû--ð'ÿÿ--Yýýû6ýçû	ú"-Qýçû6ýõû--ð'ÿÿ--!ý@ýÀ	ú"-ýüûýüû--ð'ÿÿ--@èûÀÞû	ú"-ýâûýÜû--ð'ÿÿ-- ýæûýÜû	ú"-ýÞûýÜû--ð'ÿÿ--#ýäûýÙû	ú"-ýÜûýÙû--ð'ÿÿ--%ýáûýØû	ú"-ýÙûýØû--ð'ÿÿ--'ýàûý×û	ú"-ýØûý×û--ð'ÿÿ--+ý@ýÀ	ú"-ý×û#ýÖû--ð'ÿÿ---ý@#ýÀ	ú"-!ýÖû'ýÖû--ð'ÿÿ--0ý@%ýÀ	ú"-#ýÖû*ýÖû--ð'ÿÿ--3ý@(ýÀ	ú"-(ýÖû+ý×û--ð'ÿÿ--4ýáû+ý×û	ú"-+ý×û,ýÙû--ð'ÿÿ--6ýãû,ýÙû	ú"-,ýÙû.ýÛû--ð'ÿÿ--@FûÀ=û	ú"-Èü;ûÈü@û--ð'ÿÿ--@HûÀ>û	ú"-Èü<ûÈüBû--ð'ÿÿ--ÐüJûÇü@û	ú"-Èü@ûÇüBû--ð'ÿÿ--ÏüLûÅüBû	ú"-ÇüBûÅüDû--ð'ÿÿ--ÍüOûÃüDû	ú"-ÅüDûÃüGû--ð'ÿÿ--ËüRûÁüGû	ú"-ÃüGûÁüJû--ð'ÿÿ--ÉüTû¾üJû	ú"-ÁüJû¾üLû--ð'ÿÿ--ÆüVû¼üLû	ú"-¾üLû¼üNû--ð'ÿÿ--ÄüWûºüNû	ú"-¼üNûºüOû--ð'ÿÿ--ÂüXû¸üOû	ú"-ºüOû¸üPû--ð'ÿÿ--Àü@·üÀ	ú"-ºüPûµüPû--ð'ÿÿ--=üúüWú	ú"-üxú5üWú--ð'ÿÿ--üRúíû%ú	ú"-ü%úíûJú--ð'ÿÿ--Ûû2ú¸ûú	ú"-¸û*úÓûú--ð'ÿÿ--Cüú!üú	ú"-;üú!üú--ð'ÿÿ--/ühúü:ú	ú"-ü`ú'ü:ú--ð'ÿÿ--þû@úÔûú	ú"-öûúÔû8ú--ð'ÿÿ-- û0úû ú	ú"-û(úû ú--ð'ÿÿ--Ùû@µûÀ	ú"-Ñûãúµûàú--ð'ÿÿ--½û@ûÀ	ú"-µûàúûÕú--ð'ÿÿ--¤ûÝúûÅú	ú"-ûÕúûÅú--ð'ÿÿ--ûÍúuû®ú	ú"-ûÅúuû®ú--ð'ÿÿ--@¶úÀú	ú"-uû®újûú--ð'ÿÿ--@úÀyú	ú"-jûúfûyú--ð'ÿÿ--@úÀ^ú	ú"-fûyújû^ú--ð'ÿÿ--@fúÀDú	ú"-jû^úuûDú--ð'ÿÿ--ûLúuû.ú	ú"-uûDúû.ú--ð'ÿÿ--¤û6úûú	ú"-û.úûú--ð'ÿÿ--½û@ûÀ	ú"-ûúµûú--ð'ÿÿ--Ùû@µûÀ	ú"-µûúÑûú--ð'ÿÿ--ôû@ÑûÀ	ú"-Ñûúìûú--ð'ÿÿ--ü@ìûÀ	ú"-ìûúüú--ð'ÿÿ--$ü6úüú	ú"-üúü.ú--ð'ÿÿ--5üLúü.ú	ú"-ü.ú-üDú--ð'ÿÿ--@fúÀDú	ú"--üDú7ü^ú--ð'ÿÿ--@úÀ^ú	ú"-7ü^ú;üyú--ð'ÿÿ--@úÀyú	ú"-;üyú7üú--ð'ÿÿ--@¶úÀú	ú"-7üú-ü®ú--ð'ÿÿ--5üÍúü®ú	ú"--ü®úüÅú--ð'ÿÿ--$üÝúüÅú	ú"-üÅúüÕú--ð'ÿÿ--ü@ìûÀ	ú"-üÕúìûàú--ð'ÿÿ--ôû@ÑûÀ	ú"-ìûàúÑûãú--ð'ÿÿ--úü3üÑüü	ú"-Ñü+üòüü--ð'ÿÿ--üåûuüÂû	ú"-uüÝûüÂû--ð'ÿÿ--ýPüÞü.ü	ú"-øü.üÞüHü--ð'ÿÿ--«üóûüÚû	ú"-£üÚûüëû--ð'ÿÿ--]üãûMüÓû	ú"-MüÛûUüÓû--ð'ÿÿ--ü@süÀ	ú"-üüsüü--ð'ÿÿ--ü@YüÀ	ú"-süüYüü--ð'ÿÿ--aüüCüxü	ú"-YüüCüxü--ð'ÿÿ--Küü2übü	ú"-Cüxü2übü--ð'ÿÿ--@jüÀHü	ú"-2übü(üHü--ð'ÿÿ--@PüÀ,ü	ú"-(üHü$ü,ü--ð'ÿÿ--@4üÀü	ú"-$ü,ü(üü--ð'ÿÿ--@üÀ÷û	ú"-(üü2ü÷û--ð'ÿÿ--Küÿû2üáû	ú"-2ü÷ûCüáû--ð'ÿÿ--aüéûCüÐû	ú"-CüáûYüÐû--ð'ÿÿ--ü@YüÀ	ú"-YüÐûsüÆû--ð'ÿÿ--ü@süÀ	ú"-süÆûüÂû--ð'ÿÿ--@3üÀü	ú"-õüüøü+ü--ð'ÿÿ--@OüÀ+ü	ú"-øü+üõüGü--ð'ÿÿ--@iüÀGü	ú"-õüGüëüaü--ð'ÿÿ--óüüÚüaü	ú"-ëüaüÚüwü--ð'ÿÿ--âüüÄüwü	ú"-ÚüwüÄüü--ð'ÿÿ--Ìü@ªüÀ	ú"-Äüüªüü--ð'ÿÿ--²ü@üÀ	ú"-ªüüüü--ð'ÿÿ--½üü³üü	ú"-µüü³üü--ð'ÿÿ--»ü@°üÀ	ú"-³üü°üü--ð'ÿÿ--¸ü@®üÀ	ú"-²üü¬üü--ð'ÿÿ--¶ü@«üÀ	ú"-°üü©üü--ð'ÿÿ--³ü@¨üÀ	ú"-«üü¨üü--ð'ÿÿ--°üü¦üü	ú"-¨üü¦üü--ð'ÿÿ--®üü¤üü	ú"-¦üü¤üü--ð'ÿÿ--¬üü£üü	ú"-¤üü£üü--ð'ÿÿ--@üÀü	ú"-£üü¢üü--ð'ÿÿ--@üÀü	ú"-¢üü£üü--ð'ÿÿ--¬üü£üü	ú"-£üü¤üü--ð'ÿÿ--êþúÀþuú	ú"-Àþúâþuú--ð'ÿÿ--ÆþrúþDú	ú"-¾þDúþjú--ð'ÿÿ--þQúdþ.ú	ú"-dþIúþ.ú--ð'ÿÿ--ðþ¼úÍþú	ú"-èþúÍþ´ú--ð'ÿÿ--Ûþú®þYú	ú"-®þúÓþYú--ð'ÿÿ--«þ_úþ5ú	ú"-£þ5úþWú--ð'ÿÿ--LþOú<þ?ú	ú"-<þGúDþ?ú--ð'ÿÿ--þ@`þÀ	ú"-~þû`þÿú--ð'ÿÿ--hþ@EþÀ	ú"-`þÿúEþóú--ð'ÿÿ--Mþûú/þàú	ú"-Eþóú/þàú--ð'ÿÿ--@ÐúÀ®ú	ú"-þÈúþ®ú--ð'ÿÿ--@¶úÀú	ú"-þ®úþú--ð'ÿÿ--@úÀxú	ú"-þúþxú--ð'ÿÿ--@úÀ_ú	ú"-þxú$þ_ú--ð'ÿÿ-->þgú$þJú	ú"-$þ_ú6þJú--ð'ÿÿ--TþRú6þ:ú	ú"-6þJúLþ:ú--ð'ÿÿ--nþ@LþÀ	ú"-Lþ:úfþ1ú--ð'ÿÿ--þ@fþÀ	ú"-fþ1úþ.ú--ð'ÿÿ--¤þ@þÀ	ú"-þ.úþ3ú--ð'ÿÿ--½þ@þÀ	ú"-þ3úµþ>ú--ð'ÿÿ--ÓþWúµþ>ú	ú"-µþ>úËþOú--ð'ÿÿ--ãþmúËþOú	ú"-ËþOúÛþeú--ð'ÿÿ--@úÀeú	ú"-Ûþeúåþú--ð'ÿÿ--@¢úÀú	ú"-åþúèþú--ð'ÿÿ--@½úÀú	ú"-èþúãþµú--ð'ÿÿ--@ÖúÀµú	ú"-ãþµúÙþÎú--ð'ÿÿ--áþìúÈþÎú	ú"-ÙþÎúÈþäú--ð'ÿÿ--Ðþýú²þäú	ú"-Èþäú²þõú--ð'ÿÿ--ºþ@þÀ	ú"-²þõúþÿú--ð'ÿÿ--¡þ@~þÀ	ú"-þÿú~þû--ð'ÿÿ--(þ@þÀ	ú"-þÇú"þÇú--ð'ÿÿ--)þÑú þÇú	ú"- þÇú!þÉú--ð'ÿÿ--+þÓú!þÉú	ú"-!þÉú#þËú--ð'ÿÿ---þÕú#þËú	ú"-#þËú%þÍú--ð'ÿÿ--/þ×ú%þÍú	ú"-%þÍú'þÏú--ð'ÿÿ--1þÚú'þÏú	ú"-'þÏú)þÒú--ð'ÿÿ--3þÝú)þÒú	ú"-)þÒú+þÕú--ð'ÿÿ--@àúÀÕú	ú"-+þÕú,þØú--ð'ÿÿ--5þâú,þØú	ú"-,þØú-þÚú--ð'ÿÿ--6þäú-þÚú	ú"--þÚú.þÜú--ð'ÿÿ--@ôúÀÜú	ú"-.þÚú.þîú--ð'ÿÿ--A¿ýý	ú"-·ý9ý--ð'ÿÿ--ýð`ý	ú"-`ýðý--ð'ÿÿ--æný½Fý	ú"-½fýÞFý--ð'ÿÿ--FÝý#ºý	ú"->ºý#Õý--ð'ÿÿ--3§ýwý	ú"-ý+wý--ð'ÿÿ--ýØOý	ú"-þOýØuý--ð'ÿÿ--¹dýHý	ú"-±Hý--ð'ÿÿ--Ô@¯À	ú"-Ì&þ¯"þ--ð'ÿÿ--·@À	ú"-¯"þþ--ð'ÿÿ--þþ	ú"-þþ--ð'ÿÿ--þkîý	ú"-þkîý--ð'ÿÿ--@öýÀÓý	ú"-kîý_Óý--ð'ÿÿ--@ÛýÀµý	ú"-_Óýµý--ð'ÿÿ--@½ýÀý	ú"-µý_ý--ð'ÿÿ--@ ýÀý	ú"-_ýký--ð'ÿÿ--ýkeý	ú"-kýeý--ð'ÿÿ--mýSý	ú"-eýSý--ð'ÿÿ--·@À	ú"-Sý¯Hý--ð'ÿÿ--Ô@¯À	ú"-¯HýÌDý--ð'ÿÿ--ò@ÌÀ	ú"-ÌDýêHý--ð'ÿÿ--@êÀ	ú"-êHýSý--ð'ÿÿ--%mýSý	ú"-Sýeý--ð'ÿÿ--6ýeý	ú"-eý.ý--ð'ÿÿ--@µýÀý	ú"-7ý=­ý--ð'ÿÿ--@ÔýÀ­ý	ú"-=­ý;Ìý--ð'ÿÿ--@ñýÀÌý	ú"-;Ìý1éý--ð'ÿÿ--9þéý	ú"-1éýþ--ð'ÿÿ--'þþ	ú"-þþ--ð'ÿÿ--@ëÀ	ú"-þë"þ--ð'ÿÿ--ó@ÌÀ	ú"-ë"þÌ&þ--ð'ÿÿ--@ýÀý	ú"-6ý5ý--ð'ÿÿ--=ý3ý	ú"-5ý3ý--ð'ÿÿ--@ýÀý	ú"-3ý2ý--ð'ÿÿ--:ý1ý	ú"-2ý1ý--ð'ÿÿ--9ý/~ý	ú"-1ý/~ý--ð'ÿÿ--»ýáü	ú"-ý³áü--ð'ÿÿ--Þüi®ü	ú"-®üiÖü--ð'ÿÿ--M»ü7¦ü	ú"-7³üE¦ü--ð'ÿÿ--¿*ýý	ú"-·ý"ý--ð'ÿÿ--¬ôüÅü	ú"-ìü¤Åü--ð'ÿÿ--3²üü	ú"-ªü+ü--ð'ÿÿ--N@,À	ú"-Ftý,qý--ð'ÿÿ--4@À	ú"-,qýgý--ð'ÿÿ--oýüXý	ú"-gýüXý--ð'ÿÿ--`ýéDý	ú"-üXýéDý--ð'ÿÿ--@(ýÀý	ú"-Ù ýÕý--ð'ÿÿ--@	ýÀãü	ú"-ÕýÚãü--ð'ÿÿ--@ëüÀÇü	ú"-ÚãüçÇü--ð'ÿÿ--Ïüç¯ü	ú"-çÇüú¯ü--ð'ÿÿ--·üúü	ú"-ú¯üü--ð'ÿÿ--9@À	ú"-ü1ü--ð'ÿÿ--X@1À	ú"-1üPü--ð'ÿÿ--®ümü	ú"-mü¦ü--ð'ÿÿ--¤Áü¦ü	ú"-¦ü¹ü--ð'ÿÿ--´Ùü¹ü	ú"-¹ü¬Ñü--ð'ÿÿ--@ôüÀÑü	ú"-¬Ñüµìü--ð'ÿÿ--@ýÀìü	ú"-µìü·ý--ð'ÿÿ--@-ýÀý	ú"-·ý²%ý--ð'ÿÿ--@GýÀ%ý	ú"-²%ý¦?ý--ð'ÿÿ--®]ý?ý	ú"-¦?ýUý--ð'ÿÿ--nýUý	ú"-Uýfý--ð'ÿÿ--@cÀ	ú"-fýcpý--ð'ÿÿ--k@FÀ	ú"-cpýFtý--ð'ÿÿ--m½üd³ü	ú"-e³üdµü--ð'ÿÿ--l¿übµü	ú"-dµüb·ü--ð'ÿÿ--jÀü`·ü	ú"-b·ü`¸ü--ð'ÿÿ--h@À	ú"-b¸üZ¸ü--ð'ÿÿ--d@ZÀ	ú"-^¸üX¸ü--ð'ÿÿ--b@VÀ	ú"-Z¸üV·ü--ð'ÿÿ--^¿üT¶ü	ú"-V·üT¶ü--ð'ÿÿ--¾üR´ü	ú"-T¶üR´ü--ð'ÿÿ--Z¼üP²ü	ú"-R´üP²ü--ð'ÿÿ--XºüO°ü	ú"-P²üO°ü--ð'ÿÿ--W¸üN®ü	ú"-O°üN®ü--ð'ÿÿ--@?ýÀ'ý	ú"-Ü%ýÜ9ý--ð'ÿÿ--æ0ýÜ'ý	ú"-Ü'ýÞ(ý--ð'ÿÿ--@3ýÀ(ý	ú"-Þ(ýß+ý--ð'ÿÿ--è5ýß+ý	ú"-ß+ýà-ý--ð'ÿÿ--@9ýÀ-ý	ú"-à-ýá1ý--ð'ÿÿ--ë<ýá1ý	ú"-á1ýã4ý--ð'ÿÿ--í?ýã4ý	ú"-ã4ýå7ý--ð'ÿÿ--@BýÀ7ý	ú"-å7ýæ:ý--ð'ÿÿ--@DýÀ:ý	ú"-æ8ýæ>ý--ð'ÿÿ--ïFýæ<ý	ú"-æ<ýç>ý--ð'ÿÿ--@VýÀ>ý	ú"-ç<ýçPý--ð'ÿÿ--÷ýËZý	ú"-Ë~ýïZý--ð'ÿÿ--ÕVý¦'ý	ú"-Í'ý¦Ný--ð'ÿÿ--4ýtý	ú"-t,ýý--ð'ÿÿ--ü£ýÙý	ú"-ôýÙý--ð'ÿÿ--êmýº>ý	ú"-ºeýâ>ý--ð'ÿÿ--¼Cýý	ú"-´ý;ý--ð'ÿÿ--o*ýRý	ú"-R"ýgý--ð'ÿÿ--@gÀ	ú"-ìýgéý--ð'ÿÿ--o@MÀ	ú"-géýMßý--ð'ÿÿ--Uçý6Îý	ú"-Mßý6Îý--ð'ÿÿ-->Öý$¹ý	ú"-6Îý$¹ý--ð'ÿÿ--@ÁýÀý	ú"-$¹ýý--ð'ÿÿ--@§ýÀý	ú"-ýý--ð'ÿÿ--@ýÀhý	ú"-ýhý--ð'ÿÿ--:Ký!,ý	ú"-!Cý2,ý--ð'ÿÿ--P4ý2ý	ú"-2,ýHý--ð'ÿÿ--j@HÀ	ú"-Hýbý--ð'ÿÿ--@bÀ	ú"-bý~ý--ð'ÿÿ--¢@~À	ú"-~ýý--ð'ÿÿ--½@À	ú"-ýµý--ð'ÿÿ--Ô.ýµý	ú"-µýÌ&ý--ð'ÿÿ--çBýÌ&ý	ú"-Ì&ýß:ý--ð'ÿÿ--@ýÀUý	ú"-íUýósý--ð'ÿÿ--@ýÀsý	ú"-ósýòý--ð'ÿÿ--@·ýÀý	ú"-òýè¯ý--ð'ÿÿ--ðÐýÖ¯ý	ú"-è¯ýÖÈý--ð'ÿÿ--Þäý¾Èý	ú"-ÖÈý¾Üý--ð'ÿÿ--Æ@¢À	ú"-¾Üý¢èý--ð'ÿÿ--ª@À	ú"-¢èýìý--ð'ÿÿ--ò@éÀ	ú"-ìLýçLý--ð'ÿÿ--@TýÀKý	ú"-éNýéIý--ð'ÿÿ--ñSýèIý	ú"-éKýèIý--ð'ÿÿ--ðQýæGý	ú"-èIýæGý--ð'ÿÿ--îOýåEý	ú"-æGýåEý--ð'ÿÿ--@MýÀBý	ú"-åEýäBý--ð'ÿÿ--ìJýã@ý	ú"-äBýã@ý--ð'ÿÿ--ëHýâ>ý	ú"-ã@ýâ>ý--ð'ÿÿ--êFýà<ý	ú"-â>ýà<ý--ð'ÿÿ--@DýÀ;ý	ú"-à>ýà9ý--ð'ÿÿ--è@ßÀ	ú"-â;ýÝ;ý--ð'ÿÿ--D]ý:Sý	ú"-:Sý<Uý--ð'ÿÿ--E^ý<Uý	ú"-<Uý=Vý--ð'ÿÿ--@aýÀVý	ú"-=Vý>Yý--ð'ÿÿ--@dýÀYý	ú"->Wý>^ý--ð'ÿÿ--@gýÀ	ú"->=_ý--ð'ÿÿ--@jýÀ_ý	ú"-=_ý<bý--ð'ÿÿ--@mýÀbý	ú"-<bý;eý--ð'ÿÿ--Coý8eý	ú"-;eý8gý--ð'ÿÿ--@pý6gý	ú"-8gý6hý--ð'ÿÿ-->qý4hý	ú"-6hý4iý--ð'ÿÿ--<@2À	ú"-6iý0iý--ð'ÿÿ--¿Ôþ¨þ	ú"-Ìþ·¨þ--ð'ÿÿ--¥þnuþ	ú"-uþnþ--ð'ÿÿ--Iþ<uþ	ú"-<zþAuþ--ð'ÿÿ--Äñþ¡Îþ	ú"-¼Îþ¡éþ--ð'ÿÿ--±ºþþ	ú"-²þ©þ--ð'ÿÿ--uþrdþ	ú"-|dþrmþ--ð'ÿÿ--7xþ	ú"-pþ/--ð'ÿÿ--S@*À	ú"-K:ÿ*6ÿ--ð'ÿÿ--2@À	ú"-*6ÿ(ÿ--ð'ÿÿ--0ÿôÿ	ú"-(ÿôÿ--ð'ÿÿ--@ÿÀæþ	ú"-éÿÞæþ--ð'ÿÿ--@îþÀÊþ	ú"-ÞæþÚÊþ--ð'ÿÿ--@ÒþÀ¬þ	ú"-ÚÊþÞ¬þ--ð'ÿÿ--@´þÀþ	ú"-Þ¬þéþ--ð'ÿÿ--þézþ	ú"-éþûzþ--ð'ÿÿ--þûhþ	ú"-ûzþhþ--ð'ÿÿ--6@À	ú"-hþ.--ð'ÿÿ--S@.À	ú"-.KXþ--ð'ÿÿ--uþq`þ	ú"-q`þmþ--ð'ÿÿ--¨þmþ	ú"-mþ þ--ð'ÿÿ--¸þ þ	ú"- þ°þ--ð'ÿÿ--@ºþÀþ	ú"-°þ¹²þ--ð'ÿÿ--@×þÀ²þ	ú"-¹²þ¼Ïþ--ð'ÿÿ--@óþÀÏþ	ú"-¼Ïþ·ëþ--ð'ÿÿ--@ÿÀëþ	ú"-·ëþ«ÿ--ð'ÿÿ--³#ÿÿ	ú"-«ÿÿ--ð'ÿÿ--¡4ÿÿ	ú"-ÿ,ÿ--ð'ÿÿ--@gÀ	ú"-,ÿg7ÿ--ð'ÿÿ--o@KÀ	ú"-g7ÿK:ÿ--ð'ÿÿ--lþcþ	ú"-dþc|þ--ð'ÿÿ--kþa|þ	ú"-c|þa~þ--ð'ÿÿ--i@^À	ú"-a~þ^þ--ð'ÿÿ--f@À	ú"-`þZþ--ð'ÿÿ--d@YÀ	ú"-þYþ--ð'ÿÿ--a@VÀ	ú"-YþVþ--ð'ÿÿ--^@SÀ	ú"-VþS~þ--ð'ÿÿ--[@PÀ	ú"-S~þPþ--ð'ÿÿ--XþOþ	ú"-PþOþ--ð'ÿÿ--WþNyþ	ú"-OþNyþ--ð'ÿÿ--VþMwþ	ú"-NyþMwþ--ð'ÿÿ--óÿéÿ	ú"-éÿëÿ--ð'ÿÿ--õÿëÿ	ú"-ëÿíÿ--ð'ÿÿ--÷ÿíÿ	ú"-íÿïÿ--ð'ÿÿ--øÿïÿ	ú"-ïÿðÿ--ð'ÿÿ--úÿðÿ	ú"-ðÿòÿ--ð'ÿÿ--fÀÿ;ÿ	ú"-;¸ÿ^ÿ--ð'ÿÿ--Eÿ`ÿ	ú"-=`ÿÿ--ð'ÿÿ--nÿãFÿ	ú"-ãfÿFÿ--ð'ÿÿ--kÝÿHºÿ	ú"-cºÿHÕÿ--ð'ÿÿ--X§ÿ)wÿ	ú"-)ÿPwÿ--ð'ÿÿ--+~ÿþPÿ	ú"-#Pÿþvÿ--ð'ÿÿ--ßdÿÂHÿ	ú"-Â×Hÿ--ð'ÿÿ--ú@×À	ú"-ò&×#--ð'ÿÿ--ß@¼À	ú"-×#¼--ð'ÿÿ--Ä!¦	ú"-¼¦--ð'ÿÿ--®óÿ	ú"-¦óÿ--ð'ÿÿ--ûÿÚÿ	ú"-óÿÚÿ--ð'ÿÿ--@âÿÀ¿ÿ	ú"-Úÿ¿ÿ--ð'ÿÿ--@ªÿÀÿ	ú"-¢ÿÿ--ð'ÿÿ--¥ÿkÿ	ú"-ÿkÿ--ð'ÿÿ--¼sÿWÿ	ú"-kÿ´Wÿ--ð'ÿÿ--Ø@´À	ú"-´WÿÐJÿ--ð'ÿÿ--ö@ÐÀ	ú"-ÐJÿîDÿ--ð'ÿÿ--@îÀ	ú"-îDÿGÿ--ð'ÿÿ--1@À	ú"-Gÿ)Sÿ--ð'ÿÿ--Jmÿ)Sÿ	ú"-)SÿBeÿ--ð'ÿÿ--@¨ÿÀÿ	ú"-Yÿa ÿ--ð'ÿÿ--@ÅÿÀ ÿ	ú"-a ÿc½ÿ--ð'ÿÿ--@áÿÀ½ÿ	ú"-c½ÿ]Ùÿ--ð'ÿÿ--@úÿÀÙÿ	ú"-]ÙÿRòÿ--ð'ÿÿ--Z@òÿ	ú"-Ròÿ@--ð'ÿÿ--H!(	ú"-@(--ð'ÿÿ--0@À	ú"-(#--ð'ÿÿ--@òÀ	ú"-#ò&--ð'ÿÿ--^ÿUÿ	ú"-VÿUÿ--ð'ÿÿ--]ÿTÿ	ú"-UÿTÿ--ð'ÿÿ--ÿR~ÿ	ú"-TÿR~ÿ--ð'ÿÿ--ZÿPÿ	ú"-R~ÿPÿ--ð'ÿÿ--XÿNxÿ	ú"-PÿNxÿ--ð'ÿÿ--VÿMvÿ	ú"-NxÿMvÿ--ð'ÿÿ--U~ÿJsÿ	ú"-MvÿJsÿ--ð'ÿÿ--@ÿÀpÿ	ú"-JsÿIpÿ--ð'ÿÿ--QxÿHnÿ	ú"-IpÿHnÿ--ð'ÿÿ--PvÿGlÿ	ú"-HnÿGlÿ--ð'ÿÿ--@ÿÀlÿ	ú"-GjÿG~ÿ--ð'ÿÿ--®ÿ¥ÿ	ú"-¥ÿ¦ÿ--ð'ÿÿ-- ¯ÿ¦ÿ	ú"-¦ÿ§ÿ--ð'ÿÿ--@²ÿÀ§ÿ	ú"-§ÿªÿ--ð'ÿÿ--¢´ÿªÿ	ú"-ªÿ¬ÿ--ð'ÿÿ--@·ÿÀ¬ÿ	ú"-ªÿ±ÿ--ð'ÿÿ--@ºÿÀ¯ÿ	ú"-­ÿ´ÿ--ð'ÿÿ--@½ÿÀ²ÿ	ú"-²ÿµÿ--ð'ÿÿ--@ÀÿÀµÿ	ú"-µÿ¸ÿ--ð'ÿÿ-- Âÿ¸ÿ	ú"-¸ÿºÿ--ð'ÿÿ--Ãÿºÿ	ú"-ºÿ»ÿ--ð'ÿÿ--Äÿ»ÿ	ú"-»ÿ¼ÿ--ð'ÿÿ--Æ@¬À	ú"-¾	ý¬ý--ð'ÿÿ--´@À	ú"-¬ýþü--ð'ÿÿ--¢ýòü	ú"-þüòü--ð'ÿÿ--@áüÀÅü	ú"-~Ùü|Åü--ð'ÿÿ--@ÍüÀ°ü	ú"-|Åü°ü--ð'ÿÿ--¸üü	ú"-°üü--ð'ÿÿ-- ¦üü	ú"-üü--ð'ÿÿ--³@À	ú"-ü«ü--ð'ÿÿ--Ç@«À	ú"-«ü¿ü--ð'ÿÿ--Ü@¿À	ú"-¿üÔü--ð'ÿÿ--îüÔü	ú"-Ôüæü--ð'ÿÿ--ü¨üæü	ú"-æüô ü--ð'ÿÿ--ºüô ü	ú"-ô üþ²ü--ð'ÿÿ--@ÏüÀ²ü	ú"-þ²üÇü--ð'ÿÿ--@ãüÀÇü	ú"-ÇüþÛü--ð'ÿÿ--öüôÛü	ú"-þÛüôîü--ð'ÿÿ--üýåîü	ú"-ôîüåýü--ð'ÿÿ--íýÓýü	ú"-åýüÓý--ð'ÿÿ--Û@¾À	ú"-Óý¾	ý--ð'ÿÿ--@À	ú"-~ßüßü--ð'ÿÿ--@éüÀßü	ú"-Ýüãü--ð'ÿÿ--ëüáü	ú"-áüãü--ð'ÿÿ--îüãü	ú"-ãüæü--ð'ÿÿ--ðüæü	ú"-æüèü--ð'ÿÿ--@óüÀèü	ú"-èüëü--ð'ÿÿ--õüëü	ú"-ëüíü--ð'ÿÿ--÷üíü	ú"-íüïü--ð'ÿÿ--@øüÀïü	ú"-íüòü--ð'ÿÿ--ûçmû	ú"-çûmû--ð'ÿÿ--ñiûÂ:û	ú"-é:ûÂaû--ð'ÿÿ--·Fûû	ú"->û¯û--ð'ÿÿ--¶ûõû	ú"-ûõ®û--ð'ÿÿ--ûÖPû	ú"-ÖwûýPû--ð'ÿÿ--ØVûª(û	ú"-Ð(ûªNû--ð'ÿÿ--=ûn!û	ú"-n5û!û--ð'ÿÿ--§@À	ú"-ÿûüû--ð'ÿÿ--@hÀ	ú"-üûhñû--ð'ÿÿ--pùûRáû	ú"-hñûRáû--ð'ÿÿ--Zéû?Ëû	ú"-Ráû?Ëû--ð'ÿÿ--@ÓûÀ±û	ú"-?Ëû3±û--ð'ÿÿ--@¹ûÀû	ú"-3±û.û--ð'ÿÿ--@ûÀzû	ú"-.û/zû--ð'ÿÿ--@ûÀ^û	ú"-/zû8^û--ð'ÿÿ--nFûO,û	ú"-O>ûf,û--ð'ÿÿ--@fÀ	ú"-f,û!û--ð'ÿÿ--§@À	ú"-!ûû--ð'ÿÿ--Ä@À	ú"-û¼!û--ð'ÿÿ--ß@¼À	ú"-¼!û×,û--ð'ÿÿ--÷Fû×,û	ú"-×,ûï>û--ð'ÿÿ--	^ûï>û	ú"-ï>ûVû--ð'ÿÿ--@yûÀVû	ú"-Vûqû--ð'ÿÿ--@ûÀqû	ú"-qûû--ð'ÿÿ--@³ûÀû	ú"-û«û--ð'ÿÿ--°@À	ú"-ªÿûÿû--ð'ÿÿ--¾Åûµ»û	ú"-¶½ûµ»û--ð'ÿÿ--@ÃûÀ¸û	ú"-µ½ûµ¶û--ð'ÿÿ--@ÀûÀ¶û	ú"-µºûµ´û--ð'ÿÿ--@¾ûÀ³û	ú"-µ¶û¶³û--ð'ÿÿ--À»û¶°û	ú"-¶³û¸°û--ð'ÿÿ--Â¸û¸¯û	ú"-¸°ûº¯û--ð'ÿÿ--Å@ºÀ	ú"-º¯û½®û--ð'ÿÿ--È@½À	ú"-½®ûÀ­û--ð'ÿÿ--Ë@ÀÀ	ú"-¾­ûÅ­û--ð'ÿÿ--Í¶ûÃ­û	ú"-Ã­ûÅ®û--ð'ÿÿ--Ï¸ûÅ®û	ú"-Å®ûÇ°û--ð'ÿÿ--@OûÀFû	ú"-JDûJIû--ð'ÿÿ--RPûIGû	ú"-JGûIHû--ð'ÿÿ--QRûHHû	ú"-IHûHJû--ð'ÿÿ--@UûÀJû	ú"-HJûGMû--ð'ÿÿ--OXûEMû	ú"-GMûEPû--ð'ÿÿ--M[ûCPû	ú"-EPûCSû--ð'ÿÿ--K^ûASû	ú"-CSûAVû--ð'ÿÿ--I`û?Vû	ú"-AVû?Xû--ð'ÿÿ--Gbû=Xû	ú"-?Xû=Zû--ð'ÿÿ--Ecû<Zû	ú"-=Zû<[û--ð'ÿÿ--D@;À	ú"->[û9[û--ð'ÿÿ--Kú"[ú	ú"-"úC[ú--ð'ÿÿ--(Wúú*ú	ú"- *úúOú--ð'ÿÿ--é7úÆú	ú"-Æ/úáú--ð'ÿÿ--Q¢ú/ú	ú"-Iú/ú--ð'ÿÿ--<mú?ú	ú"-eú4?ú--ð'ÿÿ--Eúâú	ú"-úâ=ú--ð'ÿÿ--®4ú$ú	ú"-,ú¦$ú--ð'ÿÿ--ç@ÅÀ	ú"-ßèúÅæú--ð'ÿÿ--Í@¬À	ú"-Åæú¬Üú--ð'ÿÿ--´äúÍú	ú"-¬ÜúÍú--ð'ÿÿ--@¾úÀú	ú"-¶úyú--ð'ÿÿ--@¤úÀú	ú"-yúuú--ð'ÿÿ--@úÀeú	ú"-uúweú--ð'ÿÿ--@múÀKú	ú"-weúKú--ð'ÿÿ--Sú5ú	ú"-Kú5ú--ð'ÿÿ--°=ú#ú	ú"-5ú¨#ú--ð'ÿÿ--É@¨À	ú"-¨#úÁú--ð'ÿÿ--å@ÁÀ	ú"-ÁúÝú--ð'ÿÿ--@ÝÀ	ú"-Ýúùú--ð'ÿÿ--@ùÀ	ú"-ùú!ú--ð'ÿÿ--1:ú!ú	ú"-!ú)2ú--ð'ÿÿ--BPú)2ú	ú"-)2ú:Hú--ð'ÿÿ--@iúÀHú	ú"-:HúEaú--ð'ÿÿ--@úÀaú	ú"-EaúIú--ð'ÿÿ--@¡úÀú	ú"-IúFú--ð'ÿÿ--@»úÀú	ú"-Fú<³ú--ð'ÿÿ--DÑú*³ú	ú"-<³ú*Éú--ð'ÿÿ--2âúÉú	ú"-*ÉúÚú--ð'ÿÿ--@úÀ	ú"-Úúúåú--ð'ÿÿ--@ßÀ	ú"-úåúßèú--ð'ÿÿ--@À	ú"-µúµú--ð'ÿÿ--@À	ú"-µúµú--ð'ÿÿ--¿úµú	ú"-µú·ú--ð'ÿÿ--Áú·ú	ú"-·ú¹ú--ð'ÿÿ--Ãú¹ú	ú"-¹ú»ú--ð'ÿÿ--Æú»ú	ú"-»ú¾ú--ð'ÿÿ--¡Èú¾ú	ú"-¾úÀú--ð'ÿÿ--@ËúÀÀú	ú"-ÀúÃú--ð'ÿÿ--£ÍúÃú	ú"-ÃúÅú--ð'ÿÿ--¤ÏúÅú	ú"-ÅúÇú--ð'ÿÿ--¤ÐúÇú	ú"-ÇúÈú--ð'ÿÿ--7übü	ú"-b/üü--ð'ÿÿ--i	ü;Üû	ú"-aÜû;ü--ð'ÿÿ--*éûÅû	ú"-áû"Åû--ð'ÿÿ--Tüp2ü	ú"-2üpLü--ð'ÿÿ--üPñû	ú"-Püuñû--ð'ÿÿ--M÷û#Ìû	ú"-EÌû#ïû--ð'ÿÿ--ïæûÞÖû	ú"-ÞÞûçÖû--ð'ÿÿ--(@À	ú"- üü--ð'ÿÿ--@êÀ	ú"-üêü--ð'ÿÿ--òüÔ|ü	ú"-êüÔ|ü--ð'ÿÿ--ÜüÃeü	ú"-Ô|üÃeü--ð'ÿÿ--@müÀLü	ú"-Ãeü¹Lü--ð'ÿÿ--@TüÀ0ü	ú"-¹Lüµ0ü--ð'ÿÿ--@8üÀü	ú"-µ0ü¹ü--ð'ÿÿ--@üÀûû	ú"-¹üÃûû--ð'ÿÿ--ÜüÃåû	ú"-ÃûûÔåû--ð'ÿÿ--òíûÔÔû	ú"-ÔåûêÔû--ð'ÿÿ--@êÀ	ú"-êÔûÉû--ð'ÿÿ--(@À	ú"-Éû Åû--ð'ÿÿ--C@ À	ú"- Åû;Éû--ð'ÿÿ--]@;À	ú"-;ÉûUÔû--ð'ÿÿ--síûUÔû	ú"-UÔûkåû--ð'ÿÿ--ükåû	ú"-kåû|ûû--ð'ÿÿ--@üÀûû	ú"-|ûûü--ð'ÿÿ--@8üÀü	ú"-ü0ü--ð'ÿÿ--@TüÀ0ü	ú"-0üLü--ð'ÿÿ--@müÀLü	ú"-Lü|eü--ð'ÿÿ--ükeü	ú"-|eük|ü--ð'ÿÿ--süU|ü	ú"-k|üUü--ð'ÿÿ--]@;À	ú"-Uü;ü--ð'ÿÿ--C@ À	ú"-;ü ü--ð'ÿÿ-- útvú	ú"-túvú--ð'ÿÿ--rúMEú	ú"-sEúMjú--ð'ÿÿ--<Rú/ú	ú"-Jú4/ú--ð'ÿÿ--¥½úú	ú"-úµú--ð'ÿÿ--úcZú	ú"-cúZú--ð'ÿÿ--``ú65ú	ú"-X5ú6Xú--ð'ÿÿ--Oúñ?ú	ú"-ñGúù?ú--ð'ÿÿ--:@À	ú"-2ûû--ð'ÿÿ--@ýÀ	ú"-ûýõú--ð'ÿÿ--ýúæåú	ú"-ýõúæåú--ð'ÿÿ--îíúÖÎú	ú"-æåúÖÎú--ð'ÿÿ--@ÖúÀµú	ú"-ÖÎúËµú--ð'ÿÿ--@½úÀú	ú"-ËµúÈú--ð'ÿÿ--@¡úÀ~ú	ú"-ÈúË~ú--ð'ÿÿ--@úÀdú	ú"-Ë~úÖdú--ð'ÿÿ--îlúÖNú	ú"-ÖdúæNú--ð'ÿÿ--Vúæ=ú	ú"-æNúý=ú--ð'ÿÿ--@ýÀ	ú"-ý=ú2ú--ð'ÿÿ--:@À	ú"-2ú2/ú--ð'ÿÿ--U@2À	ú"-2/úM2ú--ð'ÿÿ--o@MÀ	ú"-M2úg=ú--ð'ÿÿ--Vúg=ú	ú"-g=úNú--ð'ÿÿ--lúNú	ú"-Núdú--ð'ÿÿ--@úÀdú	ú"-dú~ú--ð'ÿÿ--@¡úÀ~ú	ú"-~úú--ð'ÿÿ--@½úÀú	ú"-úµú--ð'ÿÿ--@ÖúÀµú	ú"-µúÎú--ð'ÿÿ--íúÎú	ú"-Îúåú--ð'ÿÿ--ýúgåú	ú"-åúgõú--ð'ÿÿ--o@MÀ	ú"-gõúMû--ð'ÿÿ--U@2À	ú"-Mû2û--ð'ÿÿ--$Dÿ!ÿ	ú"-<ÿ!ÿ--ð'ÿÿ--ÿÛäþ	ú"-äþÛÿ--ð'ÿÿ--Òòþ©Êþ	ú"-©êþÊÊþ--ð'ÿÿ--1aÿ>ÿ	ú"-)>ÿYÿ--ð'ÿÿ--*ÿðûþ	ú"-ð"ÿûþ--ð'ÿÿ--òÿÄÓþ	ú"-êÓþÄùþ--ð'ÿÿ--¥èþÌþ	ú"-àþÌþ--ð'ÿÿ--Á@À	ú"-¹ªÿ§ÿ--ð'ÿÿ--¥@À	ú"-§ÿÿ--ð'ÿÿ--¥ÿlÿ	ú"-ÿlÿ--ð'ÿÿ--tÿZwÿ	ú"-lÿZwÿ--ð'ÿÿ--bÿM]ÿ	ú"-ZwÿM]ÿ--ð'ÿÿ--@eÿÀBÿ	ú"-M]ÿHBÿ--ð'ÿÿ--@JÿÀ&ÿ	ú"-HBÿI&ÿ--ð'ÿÿ--kÿRðþ	ú"-Rÿcðþ--ð'ÿÿ--øþcÛþ	ú"-cðþzÛþ--ð'ÿÿ--@zÀ	ú"-zÛþÎþ--ð'ÿÿ--¼@À	ú"-Îþ´Éþ--ð'ÿÿ--Ú@´À	ú"-´ÉþÒËþ--ð'ÿÿ--÷@ÒÀ	ú"-ÒËþïÖþ--ð'ÿÿ--ñþïÖþ	ú"-ïÖþéþ--ð'ÿÿ--"	ÿéþ	ú"-éþÿ--ð'ÿÿ--@JÿÀ&ÿ	ú"-(&ÿ)Bÿ--ð'ÿÿ--@eÿÀBÿ	ú"-)Bÿ#]ÿ--ð'ÿÿ--@ÿÀ]ÿ	ú"-#]ÿwÿ--ð'ÿÿ-- ÿwÿ	ú"-wÿÿ--ð'ÿÿ--¥ÿîÿ	ú"-ÿîÿ--ð'ÿÿ--ö@ÔÀ	ú"-îÿÔ§ÿ--ð'ÿÿ--Ü@¹À	ú"-Ô§ÿ¹ªÿ--ð'ÿÿ--(@À	ú"-""ÿ"ÿ--ð'ÿÿ--'*ÿ ÿ	ú"-"ÿ ÿ--ð'ÿÿ--&(ÿÿ	ú"- ÿÿ--ð'ÿÿ--$&ÿÿ	ú"-ÿÿ--ð'ÿÿ--#$ÿÿ	ú"-ÿÿ--ð'ÿÿ--@!ÿÀÿ	ú"-ÿÿ--ð'ÿÿ--@ÿÀÿ	ú"-ÿÿ--ð'ÿÿ--@ÿÀÿ	ú"-ÿÿ--ð'ÿÿ--@ÿÀÿ	ú"-ÿÿ--ð'ÿÿ-- ÿÿ	ú"-ÿÿ--ð'ÿÿ--@ÿÀÿ	ú"-ÿÿ--ð'ÿÿ--uÿkÿ	ú"-kÿmÿ--ð'ÿÿ--v!ÿmÿ	ú"-mÿnÿ--ð'ÿÿ--w#ÿnÿ	ú"-nÿoÿ--ð'ÿÿ--@&ÿÀÿ	ú"-oÿpÿ--ð'ÿÿ--@)ÿÀÿ	ú"-pÿo!ÿ--ð'ÿÿ--@,ÿÀ!ÿ	ú"-o!ÿn$ÿ--ð'ÿÿ--@/ÿÀ$ÿ	ú"-n$ÿm'ÿ--ð'ÿÿ--u1ÿk'ÿ	ú"-m'ÿk)ÿ--ð'ÿÿ--s3ÿi)ÿ	ú"-k)ÿi+ÿ--ð'ÿÿ--q@gÀ	ú"-k+ÿe+ÿ--ð'ÿÿ--o4ÿe+ÿ	ú"-g+ÿe,ÿ--ð'ÿÿ--±µþþ	ú"-­þ©þ--ð'ÿÿ--þaZþ	ú"-Zþaþ--ð'ÿÿ--Ogþ,Dþ	ú"-,_þGDþ--ð'ÿÿ--·Òþ°þ	ú"-¯°þÊþ--ð'ÿÿ--£þvoþ	ú"-vþoþ--ð'ÿÿ--ruþHKþ	ú"-jKþHmþ--ð'ÿÿ--eþUþ	ú"-]þUþ--ð'ÿÿ--M@)À	ú"-Eÿ)ÿ--ð'ÿÿ--1@À	ú"-)ÿÿ--ð'ÿÿ--ÿúùþ	ú"-ÿúùþ--ð'ÿÿ--ÿéãþ	ú"-úùþéãþ--ð'ÿÿ--@ëþÀÊþ	ú"-éãþÞÊþ--ð'ÿÿ--@ÒþÀ®þ	ú"-ÞÊþÛ®þ--ð'ÿÿ--@¶þÀþ	ú"-Û®þÞþ--ð'ÿÿ--@þÀyþ	ú"-Þþéyþ--ð'ÿÿ--þécþ	ú"-éyþúcþ--ð'ÿÿ--kþúRþ	ú"-úcþRþ--ð'ÿÿ--1@À	ú"-Rþ)Hþ--ð'ÿÿ--M@)À	ú"-)HþEDþ--ð'ÿÿ--i@EÀ	ú"-EDþaHþ--ð'ÿÿ--@aÀ	ú"-aHþzRþ--ð'ÿÿ--kþzRþ	ú"-zRþcþ--ð'ÿÿ--©þcþ	ú"-cþ¡yþ--ð'ÿÿ--@þÀyþ	ú"-¡yþ¬þ--ð'ÿÿ--@¶þÀþ	ú"-¬þ¯®þ--ð'ÿÿ--@ÒþÀ®þ	ú"-¯®þ¬Êþ--ð'ÿÿ--@ëþÀÊþ	ú"-¬Êþ¡ãþ--ð'ÿÿ--©ÿãþ	ú"-¡ãþùþ--ð'ÿÿ--ÿzùþ	ú"-ùþzÿ--ð'ÿÿ--@aÀ	ú"-zÿaÿ--ð'ÿÿ--i@EÀ	ú"-aÿEÿ--ð'ÿÿ--Úþ°Vþ	ú"-°wþÒVþ--ð'ÿÿ--¶Rþ$þ	ú"-®$þJþ--ð'ÿÿ--x1þTþ	ú"-T)þpþ--ð'ÿÿ--àþ¾zþ	ú"-Øzþ¾þ--ð'ÿÿ--Ëgþ:þ	ú"-_þÃ:þ--ð'ÿÿ--?þqþ	ú"-þq7þ--ð'ÿÿ--</þ,þ	ú"-,'þ4þ--ð'ÿÿ--X@7À	ú"-Pßþ7Ôþ--ð'ÿÿ--?Üþ!Ãþ	ú"-7Ôþ!Ãþ--ð'ÿÿ--)Ëþ¬þ	ú"-!Ãþ¬þ--ð'ÿÿ--@´þÀþ	ú"-¬þþ--ð'ÿÿ--@þÀwþ	ú"-þwþ--ð'ÿÿ--@þÀ[þ	ú"-wþ[þ--ð'ÿÿ--@cþÀBþ	ú"-[þBþ--ð'ÿÿ--,Jþ,þ	ú"-Bþ$,þ--ð'ÿÿ--B4þ$þ	ú"-$,þ:þ--ð'ÿÿ--@:À	ú"-:þTþ--ð'ÿÿ--x@TÀ	ú"-Tþpþ--ð'ÿÿ--@pÀ	ú"-pþþ--ð'ÿÿ--­@À	ú"-þ¥þ--ð'ÿÿ--Â7þ¥þ	ú"-¥þº/þ--ð'ÿÿ--ÓNþº/þ	ú"-º/þËFþ--ð'ÿÿ--@hþÀFþ	ú"-ËFþÕ`þ--ð'ÿÿ--@þÀ`þ	ú"-Õ`þØ|þ--ð'ÿÿ--@þÀ|þ	ú"-Ø|þÓþ--ð'ÿÿ--@¹þÀþ	ú"-ÓþÈ±þ--ð'ÿÿ--@²þÀ§þ	ú"-uªþt§þ--ð'ÿÿ--@¯þÀ¤þ	ú"-t§þu¤þ--ð'ÿÿ--~¬þu¢þ	ú"-u¤þv¢þ--ð'ÿÿ--ªþvþ	ú"-v¢þxþ--ð'ÿÿ--§þxþ	ú"-xþzþ--ð'ÿÿ--@zÀ	ú"-zþþ--ð'ÿÿ--@À	ú"-þþ--ð'ÿÿ--@À	ú"-~þþ--ð'ÿÿ--¦þþ	ú"-þþ--ð'ÿÿ--§þþ	ú"-þþ--ð'ÿÿ--ªþþ	ú"-þ¢þ--ð'ÿÿ--@öÌ	ú"-î8Ì--ð'ÿÿ--Èï	ú"-ïÀ--ð'ÿÿ--Û¨»	ú"-» Ó--ð'ÿÿ--F$ð	ú"->ð$--ð'ÿÿ--1Ý°	ú"-Õ)°--ð'ÿÿ--¶×	ú"-ù×®--ð'ÿÿ--£¥	ú"---ð'ÿÿ--Ü@¸À	ú"-ÔY¸U--ð'ÿÿ--À@À	ú"-¸UJ--ð'ÿÿ--¦R8	ú"-J8--ð'ÿÿ--@w"	ú"-8w"--ð'ÿÿ--@*À	ú"-w"l--ð'ÿÿ--@Àê	ú"-ljê--ð'ÿÿ--@òÀÎ	ú"-jênÎ--ð'ÿÿ--Önµ	ú"-nÎµ--ð'ÿÿ--½	ú"-µ--ð'ÿÿ--­§	ú"-¥--ð'ÿÿ--È@¥À	ú"-¥À--ð'ÿÿ--@ÞÀ	ú"-Þø--ð'ÿÿ--ø	ú"-ø--ð'ÿÿ--,±	ú"-$©--ð'ÿÿ--;È$©	ú"-$©3À--ð'ÿÿ--@áÀÀ	ú"-3À<Ù--ð'ÿÿ--@üÀÙ	ú"-<Ù>ô--ð'ÿÿ--@Àô	ú"->ô:--ð'ÿÿ--@/À	ú"-:.'--ð'ÿÿ--6D'	ú"-.'<--ð'ÿÿ--&T<	ú"-<L--ð'ÿÿ--@ïÀ	ú"-LïV--ð'ÿÿ--÷@ÔÀ	ú"-ïVÔY--ð'ÿÿ--@À	ú"-ÚÚ--ð'ÿÿ--â@ØÀ	ú"-ÜÖ--ð'ÿÿ--à@ÕÀ	ú"-ØÕ--ð'ÿÿ--Ý@ÓÀ	ú"-×Ñ--ð'ÿÿ--Û@ÏÀ	ú"-ÓÏ--ð'ÿÿ--×@ÌÀ	ú"-ÑÊ--ð'ÿÿ--Ô@ÈÀ	ú"-ÎÆ--ð'ÿÿ--Ð@ÆÀ	ú"-ÊÄ--ð'ÿÿ--Î@ÃÀ	ú"-ÈÁ--ð'ÿÿ--ËÁ	ú"-ÃÁ--ð'ÿÿ--@ À	ú"-ÁÁ--ð'ÿÿ--só	ú"-ós--ð'ÿÿ--fó	ú"-sfó--ð'ÿÿ--@ûÀÙ	ú"-fõf×--ð'ÿÿ--áfÌ	ú"-fÙsÌ--ð'ÿÿ--»@sÀ	ú"-qÌµÌ--ð'ÿÿ--Èá³Ì	ú"-³ÌÀÙ--ð'ÿÿ--@ûÀÙ	ú"-À×Àõ--ð'ÿÿ--È³ó	ú"-Àó³--ð'ÿÿ--»@sÀ	ú"-µq--ð'ÿÿ--@sÀ	ú"-q--ð'ÿÿ--.f	ú"-sf&--ð'ÿÿ--@HÀ&	ú"-f$fB--ð'ÿÿ--Uf@	ú"-f@sM--ð'ÿÿ--@sÀ	ú"-qMM--ð'ÿÿ--»U	ú"-M³--ð'ÿÿ--È@³À	ú"-±Â--ð'ÿÿ--@UÀ	ú"-ÀÀO--ð'ÿÿ--ïqÚ	ú"-~çqÚ--ð'ÿÿ--@âÀÀ	ú"-qÜq¾--ð'ÿÿ--Èq³	ú"-qÀ~³--ð'ÿÿ--Æ@~À	ú"-|³À³--ð'ÿÿ--ÓÈ¾³	ú"-¾³ËÀ--ð'ÿÿ--@âÀÀ	ú"-Ë¾ËÜ--ð'ÿÿ--Óï¾Ú	ú"-ËÚ¾ç--ð'ÿÿ--q	ú"-~q--ð'ÿÿ--@/À	ú"-qq)--ð'ÿÿ--<q'	ú"-q'~4--ð'ÿÿ--@~À	ú"-|44--ð'ÿÿ-- <'	ú"-4'--ð'ÿÿ--@/À	ú"-)--ð'ÿÿ--@/À	ú"-)--ð'ÿÿ--¬<'	ú"-'¤4--ð'ÿÿ--Æ@¤À	ú"-¢4À4--ð'ÿÿ--Ó<¾'	ú"-¾4Ë'--ð'ÿÿ--@/À	ú"-Ë)Ë--ð'ÿÿ--Ó¾	ú"-Ë¾--ð'ÿÿ--R~=i	ú"-Jv=i--ð'ÿÿ--@qÀP	ú"-=k=N--ð'ÿÿ--RX=C	ú"-=PJC--ð'ÿÿ--@JÀ	ú"-HCC--ð'ÿÿ--XC	ú"-CP--ð'ÿÿ--@qÀP	ú"-Nk--ð'ÿÿ--~i	ú"-iv--ð'ÿÿ--@=À	ú"-·;·--ð'ÿÿ--¿=	ú"-=·~--ð'ÿÿ--@ËÀ	ú"-~~Å--ð'ÿÿ--yÿídÿØ	ú"-qÿådÿØ--ð'ÿÿ--@àÀ¿	ú"-dÿÚdÿ½--ð'ÿÿ--yÿÇdÿ²	ú"-dÿ¿qÿ²--ð'ÿÿ--ºÿ@qÿÀ	ú"-oÿ²´ÿ²--ð'ÿÿ--ÇÿÇ²ÿ²	ú"-²ÿ²¿ÿ¿--ð'ÿÿ--@àÀ¿	ú"-¿ÿ½¿ÿÚ--ð'ÿÿ--Çÿí²ÿØ	ú"-¿ÿØ²ÿå--ð'ÿÿ--Çÿ²ÿÿ	ú"-²ÿÿ¿ÿ--ð'ÿÿ--@.À	ú"-¿ÿ¿ÿ(--ð'ÿÿ--Çÿ;²ÿ&	ú"-¿ÿ&²ÿ3--ð'ÿÿ--ºÿ@ÿÀ	ú"-´ÿ3ÿ3--ð'ÿÿ-- ÿ;ÿ&	ú"-ÿ3ÿ&--ð'ÿÿ--@.Àÿ	ú"-ÿ(ÿý--ð'ÿÿ--ÿ@dÿÀ	ú"-ÿÿbÿÿ--ð'ÿÿ--@;Àÿ	ú"-dÿýdÿ5--ð'ÿÿ--:ÿ%ÿñ	ú"-2ÿñ%ÿþ--ð'ÿÿ---ÿÿñ	ú"-%ÿþÿñ--ð'ÿÿ--@ùÀØ	ú"-ÿóÿÖ--ð'ÿÿ---ÿàÿË	ú"-ÿØ%ÿË--ð'ÿÿ--mÿ@%ÿÀ	ú"-#ÿËgÿË--ð'ÿÿ--zÿàeÿË	ú"-eÿËrÿØ--ð'ÿÿ--@ùÀØ	ú"-rÿÖrÿó--ð'ÿÿ--zÿeÿñ	ú"-rÿñeÿþ--ð'ÿÿ--mÿ@%ÿÀ	ú"-gÿþ#ÿþ--ð'ÿÿ--Tÿ-?ÿ	ú"-Lÿ?ÿ%--ð'ÿÿ--@GÀ%	ú"-?ÿ#?ÿA--ð'ÿÿ--TÿS?ÿ?	ú"-?ÿ?LÿK--ð'ÿÿ--mÿ@LÿÀ	ú"-JÿKgÿK--ð'ÿÿ--zÿSeÿ?	ú"-eÿKrÿ?--ð'ÿÿ--@GÀ%	ú"-rÿArÿ#--ð'ÿÿ--zÿ-eÿ	ú"-rÿ%eÿ--ð'ÿÿ--mÿ@%ÿÀ	ú"-gÿ#ÿ--ð'ÿÿ---ÿ-ÿ	ú"-%ÿÿ%--ð'ÿÿ--@GÀ%	ú"-ÿ#ÿA--ð'ÿÿ---ÿSÿ?	ú"-ÿ?%ÿK--ð'ÿÿ--~@À	ú"-x--ð'ÿÿ--J@À	ú"-D--ð'ÿÿ--@ÉÀ	ú"-BBÃ--ð'ÿÿ--J@À	ú"-DÁÁ--ð'ÿÿ--~@À	ú"-ÁxÁ--ð'ÿÿ--0@À	ú"-*ÚÚ--ð'ÿÿ--@ÀÚ	ú"-Ø--ð'ÿÿ--q@À	ú"-iô--ð'ÿÿ--~@iÀ	ú"-gôxô--ð'ÿÿ--o¯Z	ú"-g§Z--ð'ÿÿ--@¢À	ú"-ZZ~--ð'ÿÿ--oZs	ú"-Zgs--ð'ÿÿ--°@gÀ	ú"-esªs--ð'ÿÿ--½¨s	ú"-¨sµ--ð'ÿÿ--@¢À	ú"-µ~µ--ð'ÿÿ--½¯¨	ú"-µ¨§--ð'ÿÿ--ÕÁ	ú"-ÍÁ--ð'ÿÿ--°@À	ú"-ÁªÁ--ð'ÿÿ--½Õ¨Á	ú"-¨ÁµÍ--ð'ÿÿ--@ïÀÍ	ú"-µËµé--ð'ÿÿ--½ü¨ç	ú"-µç¨ô--ð'ÿÿ--°@À	ú"-ªôô--ð'ÿÿ--üç	ú"-ôç--ð'ÿÿ--@ïÀÍ	ú"-éË--ð'ÿÿ--ÕtÁ	ú"-ÍtÁ--ð'ÿÿ--|@gÀ	ú"-vÁeÁ--ð'ÿÿ--oÕZÁ	ú"-gÁZÍ--ð'ÿÿ--@ïÀÍ	ú"-ZËZé--ð'ÿÿ--oüZç	ú"-Zçgô--ð'ÿÿ--|@gÀ	ú"-eôvô--ð'ÿÿ--ütç	ú"-tôç--ð'ÿÿ--@ÈÀ	ú"-ýÆ--ð'ÿÿ--@;À	ú"-ÈÈ5--ð'ÿÿ--@;À	ú"-È5È--ð'ÿÿ--Ð@¡À	ú"-Ê--ð'ÿÿ--@HÀ	ú"-¡¡B--ð'ÿÿ--nïZ	ú"-ïZûf--ð'ÿÿ--@Àf	ú"-ûdû--ð'ÿÿ--ï	ú"-ûï--ð'ÿÿ--÷@®À	ú"-ñ¬--ð'ÿÿ--¶¡	ú"-®¡--ð'ÿÿ--@Àf	ú"-¡¡d--ð'ÿÿ--¶n¡Z	ú"-¡f®Z--ð'ÿÿ--Ð@®À	ú"-¬ZÊZ--ð'ÿÿ--ÝnÈZ	ú"-ÈZÕf--ð'ÿÿ--@Àf	ú"-ÕdÕ--ð'ÿÿ--ÝÈ	ú"-ÕÈ--ð'ÿÿ--V@À	ú"-P¸¸--ð'ÿÿ--@çÀ¸	ú"-¶á--ð'ÿÿ--@çÀ¸	ú"-á¶--ð'ÿÿ--#@ôÀ	ú"-¸ò¸--ð'ÿÿ--@ôÀ¸	ú"-ô¶ôî--ð'ÿÿ--	'ô	ú"-ô--ð'ÿÿ--V@ôÀ	ú"-òP--ð'ÿÿ--@'À	ú"-N!N--ð'ÿÿ--@4À	ú"-NN.--ð'ÿÿ--J@À	ú"-Dÿ--ð'ÿÿ--	ôy	ú"-ôy--ð'ÿÿ--@À`	ú"-ôô^--ð'ÿÿ--	hôS	ú"-ô`S--ð'ÿÿ--J@À	ú"-ÿSDS--ð'ÿÿ--VhBS	ú"-BSN`--ð'ÿÿ--@À`	ú"-N^N--ð'ÿÿ--VBy	ú"-NyB--ð'ÿÿ--B@À	ú"-<®®--ð'ÿÿ--@ÜÀ®	ú"-¬Ö--ð'ÿÿ--@ÜÀ®	ú"-Ö¬--ð'ÿÿ--@àÀ	ú"-	®Þ®--ð'ÿÿ--@éÀ®	ú"-à¬àã--ð'ÿÿ--õà	ú"-íà--ð'ÿÿ--B@àÀ	ú"-Þ<--ð'ÿÿ--@À	ú"-::--ð'ÿÿ--@)À	ú"-::#--ð'ÿÿ--õjàU	ú"-íUàb--ð'ÿÿ--B@àÀ	ú"-Þb<b--ð'ÿÿ--@jÀU	ú"-:d:S--ð'ÿÿ--@wÀU	ú"-:S:q--ð'ÿÿ--ý¿ýª	ú"-ý·ýª--ð'ÿÿ--@²À	ú"-ý¬ý--ð'ÿÿ--ýý	ú"-ýý--ð'ÿÿ--Üý@ýÀ	ú"-ýÖý--ð'ÿÿ--éýÔý	ú"-Ôýáý--ð'ÿÿ--@²À	ú"-áýáý¬--ð'ÿÿ--éý¿Ôýª	ú"-áýªÔý·--ð'ÿÿ--ýòýÞ	ú"-ýÞýê--ð'ÿÿ--éý@ýÀ	ú"-ýêãýê--ð'ÿÿ--@òÀÞ	ú"-áýìáýÜ--ð'ÿÿ--@ÿÀÞ	ú"-áýÜáýù--ð'ÿÿ--©ý@ýÀ	ú"-£ýý--ð'ÿÿ--ý2ý	ú"-ýý*--ð'ÿÿ--@LÀ*	ú"-ý(ýF--ð'ÿÿ--ýYýD	ú"-ýDýQ--ð'ÿÿ--©ý@ýÀ	ú"-ýQ£ýQ--ð'ÿÿ--ÜýY¡ý	ú"-¡ýQÔý--ð'ÿÿ--éý@ÔýÀ	ú"-Òýãý--ð'ÿÿ--@YÀ	ú"-áýáýS--ð'ÿÿ--0þ@ôýÀ	ú"-*þòý--ð'ÿÿ--@7À	ú"-ôýôý1--ð'ÿÿ--@7À	ú"-ôý1ôý--ð'ÿÿ--üý@ÎýÀ	ú"-öýÌý--ð'ÿÿ--@DÀ	ú"-ÎýÎý>--ð'ÿÿ--âýwÎýb	ú"-ÚýbÎýo--ð'ÿÿ--0þ@ÎýÀ	ú"-Ìýo*þo--ð'ÿÿ--@wÀb	ú"-(þq(þ`--ð'ÿÿ--@Àb	ú"-(þ`(þ~--ð'ÿÿ--âý·Îý¢	ú"-Úý¢Îý¯--ð'ÿÿ--@ÑÀ¯	ú"-Îý­ÎýË--ð'ÿÿ--âýÞÎýÉ	ú"-ÎýÉÚýÖ--ð'ÿÿ--ïý@ÚýÀ	ú"-ØýÖéýÖ--ð'ÿÿ--üýÞçýÉ	ú"-çýÖôýÉ--ð'ÿÿ--@ÑÀ¯	ú"-ôýËôý­--ð'ÿÿ--@ÑÀ¯	ú"-ôý­ôýË--ð'ÿÿ--	þÞôýÉ	ú"-ôýÉþÖ--ð'ÿÿ--#þ@þÀ	ú"-ÿýÖþÖ--ð'ÿÿ--0þÞþÉ	ú"-þÖ(þÉ--ð'ÿÿ--@ÑÀ¯	ú"-(þË(þ­--ð'ÿÿ--0þ·þ¢	ú"-(þ¯þ¢--ð'ÿÿ--Jÿ@ÿÀ	ú"-Dÿÿ--ð'ÿÿ--@¹À	ú"-ÿÿ³--ð'ÿÿ--@¹À	ú"-ÿ³ÿ--ð'ÿÿ--ÿ@èþÀ	ú"-ÿæþ--ð'ÿÿ--@ÆÀ	ú"-èþèþÀ--ð'ÿÿ--ýþùèþå	ú"-õþåèþñ--ð'ÿÿ--Jÿ@èþÀ	ú"-æþñDÿñ--ð'ÿÿ--@ùÀå	ú"-BÿóBÿã--ð'ÿÿ--@Àå	ú"-BÿãBÿ--ð'ÿÿ--Jÿ@èþÀ	ú"-DÿLæþL--ð'ÿÿ--0ÿTèþ%	ú"-èþL(ÿ%--ð'ÿÿ--@`À%	ú"-(ÿ#(ÿZ--ð'ÿÿ--ý@ÕüÀ	ú"-ýÄÓüÄ--ð'ÿÿ--@óÀÄ	ú"-ÕüÂÕüí--ð'ÿÿ--@óÀÄ	ú"-ÕüíÕüÂ--ð'ÿÿ--Ýü@¯üÀ	ú"-×üÄ­üÄ--ð'ÿÿ--@ÿÀÄ	ú"-¯üÂ¯üù--ð'ÿÿ--Ãü3¯ü	ú"-»ü¯ü+--ð'ÿÿ--ý@¯üÀ	ú"-­ü+ý+--ð'ÿÿ--@3À	ú"-	ý-	ý--ð'ÿÿ--@@À	ú"-	ý	ý:--ð'ÿÿ--ýsüü^	ú"-üü^	ýk--ð'ÿÿ--@Àk	ú"-	ýi	ý--ð'ÿÿ--ýüü	ú"-	ýüü--ð'ÿÿ--ý@âüÀ	ú"-þüàü--ð'ÿÿ--êüÕü	ú"-âüÕü--ð'ÿÿ--@À^	ú"-ÕüÕü--ð'ÿÿ--Ýü@¯üÀ	ú"-×ü^­ü^--ð'ÿÿ--@À^	ú"-¯ü¯ü--ð'ÿÿ--Cþþ.þþ	ú"-;þþ.þþ--ð'ÿÿ--6þþ"þþ	ú"-.þþ"þþ--ð'ÿÿ--@þÀkþ	ú"-"þþ"þiþ--ð'ÿÿ--6þsþ"þ^þ	ú"-"þkþ.þ^þ--ð'ÿÿ--wþ@.þÀ	ú"-,þ^þqþ^þ--ð'ÿÿ--þsþoþ^þ	ú"-oþ^þ|þkþ--ð'ÿÿ--@þÀkþ	ú"-|þiþ|þþ--ð'ÿÿ--þþoþþ	ú"-|þþoþþ--ð'ÿÿ--wþ@.þÀ	ú"-qþþ,þþ--ð'ÿÿ--6þÍþ"þ¹þ	ú"-.þ¹þ"þÅþ--ð'ÿÿ--þ@"þÀ	ú"- þÅþ~þÅþ--ð'ÿÿ--@ÍþÀ¹þ	ú"-|þÇþ|þ·þ--ð'ÿÿ--@ÚþÀ¹þ	ú"-|þ·þ|þÔþ--ð'ÿÿ--]þÿHþùþ	ú"-UþùþHþÿ--ð'ÿÿ--@'ÿÀÿ	ú"-HþÿHþ!ÿ--ð'ÿÿ--]þ4ÿHþÿ	ú"-HþÿUþ,ÿ--ð'ÿÿ--wþ@UþÀ	ú"-Sþ,ÿqþ,ÿ--ð'ÿÿ--þ4ÿoþÿ	ú"-oþ,ÿ|þÿ--ð'ÿÿ--@'ÿÀÿ	ú"-|þ!ÿ|þÿ--ð'ÿÿ--þÿoþùþ	ú"-|þÿoþùþ--ð'ÿÿ--wþ@.þÀ	ú"-qþùþ,þùþ--ð'ÿÿ--6þÿ"þùþ	ú"-.þùþ"þÿ--ð'ÿÿ--@'ÿÀÿ	ú"-"þÿ"þ!ÿ--ð'ÿÿ--6þ4ÿ"þÿ	ú"-"þÿ.þ,ÿ--ð'ÿÿ--4ýþýwþ	ú"-,ýþýwþ--ð'ÿÿ--@þÀ^þ	ú"-ýyþý--ð'ÿÿ--4ýfþýQþ	ú"-ý^þ,ýQþ--ð'ÿÿ--tý@,ýÀ	ú"-*ýQþnýQþ--ð'ÿÿ--ýfþlýQþ	ú"-lýQþyý^þ--ð'ÿÿ--@þÀ^þ	ú"-yýyýyþ--ð'ÿÿ--ýþlýwþ	ú"-yýwþlýþ--ð'ÿÿ--4ýÀþý«þ	ú"-,ý«þý¸þ--ð'ÿÿ--ý@ýÀ	ú"-ý¸þý¸þ--ð'ÿÿ--@ÀþÀ«þ	ú"-yýºþyý©þ--ð'ÿÿ--@ÌþÀ«þ	ú"-yý©þyýÆþ--ð'ÿÿ--4ý@ýÀ	ú"-.ýëþýëþ--ð'ÿÿ--@'ÿÀëþ	ú"-ýéþý!ÿ--ð'ÿÿ--tý@ýÀ	ú"-ýÿlýÿ--ð'ÿÿ--ý@lýÀ	ú"-jýÿýÿ--ð'ÿÿ--çýçûÒýÒû	ú"-ßýßûÒýÒû--ð'ÿÿ--@ÚûÀ¹û	ú"-ÒýÔûÒý·û--ð'ÿÿ--çýÁûÒý¬û	ú"-Òý¹ûßý¬û--ð'ÿÿ--'þ@ßýÀ	ú"-Ýý¬û!þ¬û--ð'ÿÿ--4þÁûþ¬û	ú"-þ¬û,þ¹û--ð'ÿÿ--@ÚûÀ¹û	ú"-,þ·û,þÔû--ð'ÿÿ--4þçûþÒû	ú"-,þÒûþßû--ð'ÿÿ--çýüÒýü	ú"-ßýüÒýü--ð'ÿÿ--4þ@ÒýÀ	ú"-Ðýü.þü--ð'ÿÿ--@üÀü	ú"-,þü,þü--ð'ÿÿ--@(üÀü	ú"-,þü,þ"ü--ð'ÿÿ--4þ[üþFü	ú"-þFü,þSü--ð'ÿÿ--@uüÀSü	ú"-,þQü,þoü--ð'ÿÿ--4þüþmü	ú"-,þmüþzü--ð'ÿÿ--'þ@ßýÀ	ú"-!þzüÝýzü--ð'ÿÿ--çýüÒýmü	ú"-ßýzüÒýmü--ð'ÿÿ--@uüÀSü	ú"-ÒýoüÒýQü--ð'ÿÿ--çý[üÒýFü	ú"-ÒýSüßýFü--ð'ÿÿ--þ@ßýÀ	ú"-ÝýFüúýFü--ð'ÿÿ--þ[üøýFü	ú"-øýFüþSü--ð'ÿÿ--@uüÀSü	ú"-þQüþoü--ð'ÿÿ--þüøýmü	ú"-þmüøýzü--ð'ÿÿ--ÿ|ýÿgý	ú"-ÿgýÿtý--ð'ÿÿ--ÿ|ýwÿgý	ú"-ÿtýwÿgý--ð'ÿÿ--@oýÀMý	ú"-wÿiýwÿKý--ð'ÿÿ--ÿUýwÿ@ý	ú"-wÿMýÿ@ý--ð'ÿÿ--Ìÿ@ÿÀ	ú"-ÿ@ýÆÿ@ý--ð'ÿÿ--ÙÿUýÄÿ@ý	ú"-Äÿ@ýÑÿMý--ð'ÿÿ--@oýÀMý	ú"-ÑÿKýÑÿiý--ð'ÿÿ--Ùÿ|ýÄÿgý	ú"-ÑÿgýÄÿtý--ð'ÿÿ--Ìÿ@ÿÀ	ú"-Æÿtýÿtý--ð'ÿÿ--ÿ@ÿÀ	ú"-ÿýÿý--ð'ÿÿ--ÿ¢ýwÿý	ú"-ÿýwÿý--ð'ÿÿ--@¼ýÀý	ú"-wÿýwÿ¶ý--ð'ÿÿ--ÿÉýwÿ´ý	ú"-wÿ´ýÿÁý--ð'ÿÿ--ÿ@ÿÀ	ú"-ÿÁýÿÁý--ð'ÿÿ--ÌÿÉýÿý	ú"-ÿÁýÄÿý--ð'ÿÿ--Ùÿ@ÄÿÀ	ú"-ÂÿýÓÿý--ð'ÿÿ--@ÉýÀý	ú"-ÑÿýÑÿÃý--ð'ÿÿ--Ìÿ@ÿÀ	ú"-Æÿþÿþ--ð'ÿÿ--ÿþwÿþ	ú"-ÿþwÿþ--ð'ÿÿ--@	þÀèý	ú"-wÿþwÿæý--ð'ÿÿ--ÿðýwÿÛý	ú"-wÿèýÿÛý--ð'ÿÿ--Ìÿ@ÿÀ	ú"-ÿÛýÆÿÛý--ð'ÿÿ--ÙÿðýÄÿÛý	ú"-ÄÿÛýÑÿèý--ð'ÿÿ--@	þÀèý	ú"-ÑÿæýÑÿþ--ð'ÿÿ--ÙÿþÄÿþ	ú"-ÑÿþÄÿþ--ð'ÿÿ--û@9ûÀ	ú"-ûû7ûû--ð'ÿÿ--hû@9ûÀ	ú"-7ûûbûû--ð'ÿÿ--@ÈûÀû	ú"-`ûû`ûÂû--ð'ÿÿ--hû@9ûÀ	ú"-bûÀû7ûÀû--ð'ÿÿ--û@9ûÀ	ú"-7ûÀûûÀû--ð'ÿÿ--[û@FûÀ	ú"-UûÚûDûÚû--ð'ÿÿ--Nûîû9ûÚû	ú"-FûÚû9ûæû--ð'ÿÿ--@	üÀæû	ú"-9ûäû9ûü--ð'ÿÿ--Nûü9ûü	ú"-9ûüFûü--ð'ÿÿ--[û@FûÀ	ú"-DûüUûü--ð'ÿÿ--ûüSûÚû	ú"-SûüûÚû--ð'ÿÿ--û@ûÀ	ú"-ûÚûûÚû--ð'ÿÿ--@üÀÚû	ú"-ûØûûü--ð'ÿÿ--NûIü9û4ü	ú"-Fû4ü9ûAü--ð'ÿÿ--û@9ûÀ	ú"-7ûAüûAü--ð'ÿÿ--@IüÀ4ü	ú"-ûCüû2ü--ð'ÿÿ--@UüÀ4ü	ú"-û2üûOü--ð'ÿÿ--pûÚÿ[ûÅÿ	ú"-hûÒÿ[ûÅÿ--ð'ÿÿ--@ÍÿÀ«ÿ	ú"-[ûÇÿ[û©ÿ--ð'ÿÿ--pû³ÿ[ûÿ	ú"-[û«ÿhûÿ--ð'ÿÿ--±û@hûÀ	ú"-fûÿ«ûÿ--ð'ÿÿ--½û³ÿ©ûÿ	ú"-©ûÿµû«ÿ--ð'ÿÿ--@ÍÿÀ«ÿ	ú"-µû©ÿµûÇÿ--ð'ÿÿ--½ûÚÿ©ûÅÿ	ú"-µûÅÿ©ûÒÿ--ð'ÿÿ--û@hûÀ	ú"-wûìÿfûìÿ--ð'ÿÿ--pû[ûìÿ	ú"-hûìÿ[ûùÿ--ð'ÿÿ--@Àùÿ	ú"-[û÷ÿ[û--ð'ÿÿ--pû'[û	ú"-[ûhû--ð'ÿÿ--û@hûÀ	ú"-fûwû--ð'ÿÿ--±û'uûìÿ	ú"-uû©ûìÿ--ð'ÿÿ--½û@©ûÀ	ú"-§ûìÿ·ûìÿ--ð'ÿÿ--@'Àìÿ	ú"-µûêÿµû!--ð'ÿÿ--û@hûÀ	ú"-wû9fû9--ð'ÿÿ--pûN[û9	ú"-hû9[ûF--ð'ÿÿ--@hÀF	ú"-[ûD[ûb--ð'ÿÿ--pût[û`	ú"-[û`hûl--ð'ÿÿ--û@hûÀ	ú"-fûlwûl--ð'ÿÿ--±ûtuû9	ú"-uûl©û9--ð'ÿÿ--½û@©ûÀ	ú"-§û9·û9--ð'ÿÿ--@tÀ9	ú"-µû7µûn--ð'ÿÿ---ú@òùÀ	ú"-'úÿðùÿ--ð'ÿÿ--@;ÿÀÿ	ú"-òùÿòù5ÿ--ð'ÿÿ--@;ÿÀÿ	ú"-òù5ÿòùÿ--ð'ÿÿ--úù@ËùÀ	ú"-ôùÿÉùÿ--ð'ÿÿ--@HÿÀÿ	ú"-ËùÿËùBÿ--ð'ÿÿ--íù@ØùÀ	ú"-çùZÿÖùZÿ--ð'ÿÿ--àùnÿËùZÿ	ú"-ØùZÿËùfÿ--ð'ÿÿ--@ÿÀfÿ	ú"-ËùdÿËùÿ--ð'ÿÿ--àùÿËùÿ	ú"-ËùÿØùÿ--ð'ÿÿ--íù@ØùÀ	ú"-Öùÿçùÿ--ð'ÿÿ-- úÿåùZÿ	ú"-åùÿúZÿ--ð'ÿÿ---ú@úÀ	ú"-úZÿ'úZÿ--ð'ÿÿ--@ÿÀZÿ	ú"-%úXÿ%úÿ--ð'ÿÿ--àù¼ÿËù§ÿ	ú"-Øù§ÿËù´ÿ--ð'ÿÿ--@ÕÿÀ´ÿ	ú"-Ëù²ÿËùÏÿ--ð'ÿÿ--àùâÿËùÍÿ	ú"-ËùÍÿØùÚÿ--ð'ÿÿ--íù@ØùÀ	ú"-ÖùÚÿçùÚÿ--ð'ÿÿ--úùâÿåùÍÿ	ú"-åùÚÿòùÍÿ--ð'ÿÿ--@ÕÿÀ´ÿ	ú"-òùÏÿòù²ÿ--ð'ÿÿ--@ÕÿÀ´ÿ	ú"-òù²ÿòùÏÿ--ð'ÿÿ--úâÿòùÍÿ	ú"-òùÍÿþùÚÿ--ð'ÿÿ-- ú@þùÀ	ú"-üùÚÿúÚÿ--ð'ÿÿ---úâÿúÍÿ	ú"-úÚÿ%úÍÿ--ð'ÿÿ--@ÕÿÀ´ÿ	ú"-%úÏÿ%ú²ÿ--ð'ÿÿ---ú¼ÿú§ÿ	ú"-%ú´ÿú§ÿ--ð'ÿÿ--Ûú@ úÀ	ú"-Õú"ýú"ý--ð'ÿÿ--@QýÀ"ý	ú"- ú ý úKý--ð'ÿÿ--@QýÀ"ý	ú"- úKý ú ý--ð'ÿÿ--¨ú@yúÀ	ú"-¢ú"ýwú"ý--ð'ÿÿ--@^ýÀ"ý	ú"-yú ýyúXý--ð'ÿÿ--ú@úÀ	ú"-úpýúpý--ð'ÿÿ--úýyúpý	ú"-úpýyúý--ð'ÿÿ--@ýÀý	ú"-yúýyúý--ð'ÿÿ--ú«ýyúý	ú"-yúýú£ý--ð'ÿÿ--ú@úÀ	ú"-ú£ýú£ý--ð'ÿÿ--Îú«ýúpý	ú"-ú£ýÆúpý--ð'ÿÿ--Ûú@ÆúÀ	ú"-ÄúpýÕúpý--ð'ÿÿ--@«ýÀpý	ú"-ÓúnýÓú¥ý--ð'ÿÿ--Ûú@yúÀ	ú"-Õúãýwúãý--ð'ÿÿ--Âúëýyú½ý	ú"-yúãýºú½ý--ð'ÿÿ--@øýÀ½ý	ú"-ºú»ýºúòý--ð'ÿÿ--û@`ûÀ	ú"-ûP^ûP--ð'ÿÿ--@~ÀP	ú"-`ûN`ûx--ð'ÿÿ--@~ÀP	ú"-`ûx`ûN--ð'ÿÿ--hû@9ûÀ	ú"-bûP7ûP--ð'ÿÿ--@ÀP	ú"-9ûN9û--ð'ÿÿ--[û@FûÀ	ú"-UûDû--ð'ÿÿ--Nû²9û	ú"-Fû9ûª--ð'ÿÿ--@ËÀª	ú"-9û¨9ûÅ--ð'ÿÿ--NûØ9ûÃ	ú"-9ûÃFûÐ--ð'ÿÿ--[û@FûÀ	ú"-DûÐUûÐ--ð'ÿÿ--ûØSû	ú"-SûÐû--ð'ÿÿ--û@ûÀ	ú"-ûû--ð'ÿÿ--@ØÀ	ú"-ûûÒ--ð'ÿÿ--ûÿûê	ú"-ûêû÷--ð'ÿÿ--@À÷	ú"-ûõû--ð'ÿÿ--û&û	ú"-ûû--ð'ÿÿ--û@lûÀ	ú"-ûjû--ð'ÿÿ--tû&`û	ú"-lû`û--ð'ÿÿ--@Àê	ú"-`û`ûè--ð'ÿÿ--hû@9ûÀ	ú"-bûê7ûê--ð'ÿÿ--@&Àê	ú"-9ûè9û --ð'ÿÿ--÷üFúãü1ú	ú"-ïü>úãü1ú--ð'ÿÿ--@9úÀú	ú"-ãü3úãüú--ð'ÿÿ--÷ü úãüú	ú"-ãüúïüú--ð'ÿÿ--8ý@ïüÀ	ú"-íüú2ýú--ð'ÿÿ--Eý ú0ýú	ú"-0ýú=ýú--ð'ÿÿ--@9úÀú	ú"-=ýú=ý3ú--ð'ÿÿ--EýFú0ý1ú	ú"-=ý1ú0ý>ú--ð'ÿÿ--ý@ïüÀ	ú"-þüXúíüXú--ð'ÿÿ--÷ümúãüXú	ú"-ïüXúãüeú--ð'ÿÿ--@úÀeú	ú"-ãücúãüú--ð'ÿÿ--÷üúãü~ú	ú"-ãü~úïüú--ð'ÿÿ--ý@ïüÀ	ú"-íüúþüú--ð'ÿÿ--8ýúüüXú	ú"-üüú0ýXú--ð'ÿÿ--Eý@0ýÀ	ú"-.ýXú?ýXú--ð'ÿÿ--@úÀXú	ú"-=ýVú=ýú--ð'ÿÿ--ýºú	ý¥ú	ú"-ý¥ú	ý²ú--ð'ÿÿ--@ÔúÀ²ú	ú"-	ý°ú	ýÎú--ð'ÿÿ--ýáú	ýÌú	ú"-	ýÌúýÙú--ð'ÿÿ--8ý@ýÀ	ú"-ýÙú2ýÙú--ð'ÿÿ--Eýáú0ýÌú	ú"-0ýÙú=ýÌú--ð'ÿÿ--@ÔúÀ²ú	ú"-=ýÎú=ý°ú--ð'ÿÿ--Eýºú0ý¥ú	ú"-=ý²ú0ý¥ú--ð'ÿÿ--8ý@ïüÀ	ú"-2ý¥úíü¥ú--ð'ÿÿ--÷üºúãü¥ú	ú"-ïü¥úãü²ú--ð'ÿÿ--@ÔúÀ²ú	ú"-ãü°úãüÎú--ð'ÿÿ--÷üáúãüÌú	ú"-ãüÌúïüÙú--ð'ÿÿ--ü@_üÀ	ú"-ü*ù]ü*ù--ð'ÿÿ--@YùÀ*ù	ú"-_ü(ù_üSù--ð'ÿÿ--@YùÀ*ù	ú"-_üSù_ü(ù--ð'ÿÿ--gü@9üÀ	ú"-aü*ù7ü*ù--ð'ÿÿ--@fùÀ*ù	ú"-9ü(ù9ü`ù--ð'ÿÿ--Zü@EüÀ	ú"-TüwùCüwù--ð'ÿÿ--Müù9üwù	ú"-Eüwù9üù--ð'ÿÿ--@¦ùÀù	ú"-9üù9ü ù--ð'ÿÿ--Mü³ù9üù	ú"-9üùEü«ù--ð'ÿÿ--Zü@EüÀ	ú"-Cü«ùTü«ù--ð'ÿÿ--ü³ùRüwù	ú"-Rü«ùüwù--ð'ÿÿ--ü@üÀ	ú"-üwùüwù--ð'ÿÿ--@³ùÀwù	ú"-üuùü­ù--ð'ÿÿ--Mü@9üÀ	ú"-GüÅù7üÅù--ð'ÿÿ--@úÀÅù	ú"-9üÃù9üúù--ð'ÿÿ--ü@9üÀ	ú"-9üøùüÞù--ð'ÿÿ--ü@üÀ	ú"-üÞùüÞù--ð'ÿÿ--Gÿ@ÿÀ	ú"-Aÿûÿû--ð'ÿÿ--@.ûÀû	ú"-ÿþúÿ(û--ð'ÿÿ--@.ûÀû	ú"-ÿ(ûÿþú--ð'ÿÿ--ÿ@åþÀ	ú"-ÿûãþû--ð'ÿÿ--@;ûÀû	ú"-åþþúåþ5û--ð'ÿÿ--ÿ@òþÀ	ú"-ÿMûðþMû--ð'ÿÿ--úþbûåþMû	ú"-òþMûåþZû--ð'ÿÿ--@|ûÀZû	ú"-åþXûåþvû--ð'ÿÿ--úþûåþtû	ú"-åþtûòþû--ð'ÿÿ--ÿ@òþÀ	ú"-ðþûÿû--ð'ÿÿ--:ÿûÿþMû	ú"-ÿþû2ÿMû--ð'ÿÿ--Gÿ@2ÿÀ	ú"-0ÿMûAÿMû--ð'ÿÿ--@ûÀMû	ú"-?ÿKû?ÿû--ð'ÿÿ--Gÿ¯û2ÿû	ú"-2ÿû?ÿ§û--ð'ÿÿ--@ÉûÀ§û	ú"-?ÿ¥û?ÿÃû--ð'ÿÿ--GÿÖû2ÿÁû	ú"-?ÿÁû2ÿÎû--ð'ÿÿ--:ÿ@òþÀ	ú"-4ÿÎûðþÎû--ð'ÿÿ--úþÖûåþÁû	ú"-òþÎûåþÁû--ð'ÿÿ--@ÉûÀ§û	ú"-åþÃûåþ¥û--ð'ÿÿ--úþ¯ûåþû	ú"-åþ§ûòþû--ð'ÿÿ--ÿ@òþÀ	ú"-ðþûÿû--ð'ÿÿ-- ÿ¯ûÿû	ú"-ÿûÿ§û--ð'ÿÿ--@ÉûÀ§û	ú"-ÿ¥ûÿÃû--ð'ÿÿ-- ÿÖûÿÁû	ú"-ÿÁûÿÎû--ð'ÿÿ--[]þFHþ	ú"-SHþFUþ--ð'ÿÿ--N]þ9Hþ	ú"-FUþ9Hþ--ð'ÿÿ--@PþÀ.þ	ú"-9Jþ9,þ--ð'ÿÿ--N6þ9"þ	ú"-9.þF"þ--ð'ÿÿ--@FÀ	ú"-D"þ"þ--ð'ÿÿ--6þ"þ	ú"-"þ.þ--ð'ÿÿ--@PþÀ.þ	ú"-,þJþ--ð'ÿÿ--]þHþ	ú"-HþUþ--ð'ÿÿ--@FÀ	ú"-UþDUþ--ð'ÿÿ--Nþ9oþ	ú"-Foþ9|þ--ð'ÿÿ--@þÀ|þ	ú"-9zþ9þ--ð'ÿÿ--Nªþ9þ	ú"-9þF¢þ--ð'ÿÿ--[@FÀ	ú"-D¢þU¢þ--ð'ÿÿ--gªþSþ	ú"-S¢þ_þ--ð'ÿÿ--@þÀ|þ	ú"-_þ_zþ--ð'ÿÿ--@þÀ|þ	ú"-_zþ_þ--ð'ÿÿ--tªþ_þ	ú"-_þl¢þ--ð'ÿÿ--@lÀ	ú"-j¢þ¢þ--ð'ÿÿ--ªþþ	ú"-¢þþ--ð'ÿÿ--@þÀ|þ	ú"-þzþ--ð'ÿÿ--þoþ	ú"-|þoþ--ð'ÿÿ--@FÀ	ú"-ïþDïþ--ð'ÿÿ--N÷þ9ãþ	ú"-Fïþ9ãþ--ð'ÿÿ--@ëþÀÉþ	ú"-9åþ9Çþ--ð'ÿÿ--NÑþ9¼þ	ú"-9ÉþF¼þ--ð'ÿÿ--@FÀ	ú"-D¼þ¼þ--ð'ÿÿ--Ñþ¼þ	ú"-¼þÉþ--ð'ÿÿ--@ëþÀÉþ	ú"-Çþåþ--ð'ÿÿ--÷þãþ	ú"-ãþïþ--ð'ÿÿ--Èªý³ý	ú"-À¢ý³ý--ð'ÿÿ--@ýÀ|ý	ú"-³ý³zý--ð'ÿÿ--Èý³oý	ú"-³|ýÀoý--ð'ÿÿ--@ÀÀ	ú"-¾oýoý--ð'ÿÿ--ýoý	ú"-oý|ý--ð'ÿÿ--@ýÀ|ý	ú"-zýý--ð'ÿÿ--ªýý	ú"-ý¢ý--ð'ÿÿ--ÈÑý³¼ý	ú"-À¼ý³Éý--ð'ÿÿ--@ëýÀÉý	ú"-³Çý³åý--ð'ÿÿ--Èøý³ãý	ú"-³ãýÀðý--ð'ÿÿ--Ô@ÀÀ	ú"-¾ðýÎðý--ð'ÿÿ--áøýÌãý	ú"-ÌðýÙãý--ð'ÿÿ--@ëýÀÉý	ú"-ÙåýÙÇý--ð'ÿÿ--@ëýÀÉý	ú"-ÙÇýÙåý--ð'ÿÿ--îøýÙãý	ú"-Ùãýæðý--ð'ÿÿ--@æÀ	ú"-äðýðý--ð'ÿÿ--øýãý	ú"-ðýãý--ð'ÿÿ--@ëýÀÉý	ú"-åýÇý--ð'ÿÿ--Ñý¼ý	ú"-Éý¼ý--ð'ÿÿ--È+þ³þ	ú"-Àþ³#þ--ð'ÿÿ--@³À	ú"-±#þ#þ--ð'ÿÿ--@+þÀþ	ú"-%þþ--ð'ÿÿ--@8þÀþ	ú"-þ2þ--ð'ÿÿ--Ìqÿ·	ú"-Äiÿ·--ð'ÿÿ--@dÿÀCÿ	ú"-·^ÿ·Aÿ--ð'ÿÿ--ÌKÿ·6ÿ	ú"-·CÿÄ6ÿ--ð'ÿÿ--@ÄÀ	ú"-Â6ÿ6ÿ--ð'ÿÿ--Kÿ6ÿ	ú"-6ÿCÿ--ð'ÿÿ--@dÿÀCÿ	ú"-Aÿ^ÿ--ð'ÿÿ--qÿ	ú"-iÿ--ð'ÿÿ--Ìÿ·ÿ	ú"-Äÿ·ÿ--ð'ÿÿ--@²ÿÀÿ	ú"-·ÿ·¬ÿ--ð'ÿÿ--Ì¿ÿ·ªÿ	ú"-·ªÿÄ·ÿ--ð'ÿÿ--Ù@ÄÀ	ú"-Â·ÿÓ·ÿ--ð'ÿÿ--æ¿ÿÑªÿ	ú"-Ñ·ÿÞªÿ--ð'ÿÿ--@²ÿÀÿ	ú"-Þ¬ÿÞÿ--ð'ÿÿ--@²ÿÀÿ	ú"-ÞÿÞ¬ÿ--ð'ÿÿ--ò¿ÿÞªÿ	ú"-Þªÿê·ÿ--ð'ÿÿ--@êÀ	ú"-è·ÿ·ÿ--ð'ÿÿ--¿ÿªÿ	ú"-·ÿªÿ--ð'ÿÿ--@²ÿÀÿ	ú"-¬ÿÿ--ð'ÿÿ--ÿÿ	ú"-ÿÿ--ð'ÿÿ--Ìåÿ·Ðÿ	ú"-ÄÐÿ·Ýÿ--ð'ÿÿ--@ÿÿÀÝÿ	ú"-·Ûÿ·ùÿ--ð'ÿÿ--Ì·÷ÿ	ú"-·÷ÿÄ--ð'ÿÿ--Ù@ÄÀ	ú"-ÂÓ--ð'ÿÿ--æÑ÷ÿ	ú"-ÑÞ÷ÿ--ð'ÿÿ--@ÿÿÀÝÿ	ú"-ÞùÿÞÛÿ--ð'ÿÿ--@ÿÿÀÝÿ	ú"-ÞÛÿÞùÿ--ð'ÿÿ--òÞ÷ÿ	ú"-Þ÷ÿê--ð'ÿÿ--@êÀ	ú"-è--ð'ÿÿ--÷ÿ	ú"-÷ÿ--ð'ÿÿ--@ÿÿÀÝÿ	ú"-ùÿÛÿ--ð'ÿÿ--åÿÐÿ	ú"-ÝÿÐÿ--ð'ÿÿ--]kH	ú"-xHkU--ð'ÿÿ--s]_H	ú"-kU_H--ð'ÿÿ--@PÀ.	ú"-_J_,--ð'ÿÿ--s6_!	ú"-_.k!--ð'ÿÿ--´@kÀ	ú"-i!®!--ð'ÿÿ--Á6¬!	ú"-¬!¹.--ð'ÿÿ--@PÀ.	ú"-¹,¹J--ð'ÿÿ--Á]¬H	ú"-¹H¬U--ð'ÿÿ--´@kÀ	ú"-®UiU--ð'ÿÿ--s_n	ú"-kn_--ð'ÿÿ--@À	ú"-_y_--ð'ÿÿ--sª_	ú"-_k¢--ð'ÿÿ--@kÀ	ú"-i¢z¢--ð'ÿÿ--ªx	ú"-x¢--ð'ÿÿ--@À	ú"-y--ð'ÿÿ--@À	ú"-y--ð'ÿÿ--ª	ú"-¢--ð'ÿÿ--´@À	ú"-¢®¢--ð'ÿÿ--Áª¬	ú"-¬¢¹--ð'ÿÿ--@À	ú"-¹¹y--ð'ÿÿ--Á¬n	ú"-¹¬n--ð'ÿÿ--Á@_À	ú"-»â]â--ð'ÿÿ--§ê_»	ú"-_â»--ð'ÿÿ--@÷À»	ú"-¹ñ--ð'ÿÿ--³@PÀ	ú"-­RüNRü--ð'ÿÿ--@PÀ	ú"-NRüzRü--ð'ÿÿ--@üÀRü	ú"-xPüxü--ð'ÿÿ--@PÀ	ú"-züNü--ð'ÿÿ--³@PÀ	ú"-Nü­ü--ð'ÿÿ--eµüP ü	ú"-] üP­ü--ð'ÿÿ--@ÎüÀ­ü	ú"-P«üPÈü--ð'ÿÿ--eÛüPÆü	ú"-PÆü]Óü--ð'ÿÿ--r@]À	ú"-[ÓülÓü--ð'ÿÿ--ÛüjÆü	ú"-jÓüxÆü--ð'ÿÿ--@ÎüÀ­ü	ú"-xÈüx«ü--ð'ÿÿ--@ÎüÀ­ü	ú"-x«üxÈü--ð'ÿÿ--ÛüxÆü	ú"-xÆüÓü--ð'ÿÿ--¦@À	ú"-Óü Óü--ð'ÿÿ--³ÛüÆü	ú"-Óü«Æü--ð'ÿÿ--@ÎüÀ­ü	ú"-«Èü««ü--ð'ÿÿ--³µü ü	ú"-«­ü ü--ð'ÿÿ--³ýíü	ú"-íü«úü--ð'ÿÿ--@ýÀúü	ú"-«øü«ý--ð'ÿÿ--³(ýý	ú"-«ý ý--ð'ÿÿ--¦@À	ú"-  ý ý--ð'ÿÿ--(ýxý	ú"- ýxý--ð'ÿÿ--@ýÀíü	ú"-xýxëü--ð'ÿÿ--@PÀ	ú"-zíüNíü--ð'ÿÿ--@(ýÀíü	ú"-PëüP"ý--ð'ÿÿ--Iúr4ú	ú"-Aúr4ú--ð'ÿÿ--@<úÀú	ú"-r6úrú--ð'ÿÿ--"úrú	ú"-rúú--ð'ÿÿ--Ç@À	ú"-úÁú--ð'ÿÿ--Ó"ú¿ú	ú"-¿úËú--ð'ÿÿ--@<úÀú	ú"-ËúË6ú--ð'ÿÿ--ÓIú¿4ú	ú"-Ë4ú¿Aú--ð'ÿÿ--púr[ú	ú"-[úrhú--ð'ÿÿ--@úÀhú	ú"-rfúrú--ð'ÿÿ--úrú	ú"-rúú--ð'ÿÿ--@À	ú"-úú--ð'ÿÿ-- úú	ú"-úú--ð'ÿÿ--@úÀhú	ú"-úfú--ð'ÿÿ--@úÀhú	ú"-fúú--ð'ÿÿ--­úú	ú"-ú¥ú--ð'ÿÿ--Ç@¥À	ú"-£úÁú--ð'ÿÿ--Óú¿ú	ú"-¿úËú--ð'ÿÿ--@úÀhú	ú"-ËúËfú--ð'ÿÿ--Ópú¿[ú	ú"-Ëhú¿[ú--ð'ÿÿ--­½ú¨ú	ú"-¥¨úµú--ð'ÿÿ--@ÖúÀµú	ú"-³úÐú--ð'ÿÿ--­ãúÎú	ú"-Îú¥Ûú--ð'ÿÿ--Ç@¥À	ú"-£ÛúÁÛú--ð'ÿÿ--Óãú¿Îú	ú"-¿ÛúËÎú--ð'ÿÿ--@ÖúÀµú	ú"-ËÐúË³ú--ð'ÿÿ--Ó½ú¿¨ú	ú"-Ëµú¿¨ú--ð'ÿÿ--Ç@À	ú"-Á¨ú¨ú--ð'ÿÿ--½úr¨ú	ú"-¨úrµú--ð'ÿÿ--@ÖúÀµú	ú"-r³úrÐú--ð'ÿÿ--ãúrÎú	ú"-rÎúÛú--ð'ÿÿ--¨@mÀ	ú"-¢æúkæú--ð'ÿÿ--@ûÀæú	ú"-mäúmû--ð'ÿÿ--@ûÀæú	ú"-mûmäú--ð'ÿÿ--u@FÀ	ú"-oæúDæú--ð'ÿÿ--@!ûÀæú	ú"-FäúFû--ð'ÿÿ--[HûF3û	ú"-S3ûF@û--ð'ÿÿ--@bûÀ@û	ú"-F>ûF--ð'ÿÿ--[oûFZû	ú"-FZûSgû--ð'ÿÿ--h@SÀ	ú"-Qgûbgû--ð'ÿÿ--uoû`Zû	ú"-`gûmZû--ð'ÿÿ--@bûÀ@û	ú"-mm>û--ð'ÿÿ--@bûÀ@û	ú"-m>ûm--ð'ÿÿ--oûmZû	ú"-mZûzgû--ð'ÿÿ--@zÀ	ú"-xgûgû--ð'ÿÿ--¨oûZû	ú"-gû Zû--ð'ÿÿ--@bûÀ@û	ú"-  >û--ð'ÿÿ--¨Hû3û	ú"- @û3û--ð'ÿÿ--[@FÀ	ú"-UûDû--ð'ÿÿ--@¼ûÀû	ú"-F~ûF¶û--ð'ÿÿ--@FÀ	ú"-F´ûû--ð'ÿÿ--¨@À	ú"-û¢û--ð'ÿÿ--@ØÀ	ú"-¼ûÖ¼û--ð'ÿÿ--@ëûÀ¼û	ú"-ØºûØåû--ð'ÿÿ--@ëûÀ¼û	ú"-ØåûØºû--ð'ÿÿ--à@²À	ú"-Ú¼û°¼û--ð'ÿÿ--@øûÀ¼û	ú"-²ºû²òû--ð'ÿÿ--Çü²	ü	ú"-¿	ü²ü--ð'ÿÿ--@8üÀü	ú"-²ü²2ü--ð'ÿÿ--ÇEü²0ü	ú"-²0ü¿=ü--ð'ÿÿ--Ó@¿À	ú"-½=üÍ=ü--ð'ÿÿ--àEüË0ü	ú"-Ë=üØ0ü--ð'ÿÿ--@8üÀü	ú"-Ø2üØü--ð'ÿÿ--@8üÀü	ú"-ØüØ2ü--ð'ÿÿ--íEüØ0ü	ú"-Ø0üå=ü--ð'ÿÿ--@åÀ	ú"-ã=ü=ü--ð'ÿÿ--Eüÿ0ü	ú"-ÿ=ü0ü--ð'ÿÿ--@8üÀü	ú"-2üü--ð'ÿÿ--üÿ	ü	ú"-üÿ	ü--ð'ÿÿ--ílüØWü	ú"-ØdüåWü--ð'ÿÿ--@åÀ	ú"-ãWüWü--ð'ÿÿ--lüÿWü	ú"-ÿWüdü--ð'ÿÿ--@üÀdü	ú"-büü--ð'ÿÿ--üÿü	ú"-üÿü--ð'ÿÿ--@åÀ	ú"-üãü--ð'ÿÿ--íüØü	ú"-åüØü--ð'ÿÿ--@üÀdü	ú"-ØüØbü--ð'ÿÿ--àlüËWü	ú"-ØdüËWü--ð'ÿÿ--Ó@¿À	ú"-ÍWü½Wü--ð'ÿÿ--Çlü²Wü	ú"-¿Wü²dü--ð'ÿÿ--@üÀdü	ú"-²bü²ü--ð'ÿÿ--Çü²ü	ú"-²ü¿ü--ð'ÿÿ--Ó@¿À	ú"-½üÍü--ð'ÿÿ--àüËü	ú"-ËüØü--ð'ÿÿ--û@ÀÀ	ú"-õJù¾Jù--ð'ÿÿ--@yùÀJù	ú"-ÀHùÀsù--ð'ÿÿ--@yùÀJù	ú"-ÀsùÀHù--ð'ÿÿ--È@À	ú"-ÂJùJù--ð'ÿÿ--@ùÀJù	ú"-Hùù--ð'ÿÿ--®¬ùù	ú"-¦ù¤ù--ð'ÿÿ--@ÆùÀ¤ù	ú"-¢ùÀù--ð'ÿÿ--®Óù¾ù	ú"-¾ù¦Ëù--ð'ÿÿ--»@¦À	ú"-¤ËùµËù--ð'ÿÿ--ÈÓù³¾ù	ú"-³ËùÀ¾ù--ð'ÿÿ--@ÆùÀ¤ù	ú"-ÀÀùÀ¢ù--ð'ÿÿ--@ÆùÀ¤ù	ú"-À¢ùÀÀù--ð'ÿÿ--ÕÓùÀ¾ù	ú"-À¾ùÍËù--ð'ÿÿ--ï@ÍÀ	ú"-ËËùéËù--ð'ÿÿ--ûÓùç¾ù	ú"-çËùó¾ù--ð'ÿÿ--@ÆùÀ¤ù	ú"-óÀùó¢ù--ð'ÿÿ--û¬ùçù	ú"-ó¤ùçù--ð'ÿÿ--ûùùçäù	ú"-çäùóñù--ð'ÿÿ--@úÀñù	ú"-óïùóú--ð'ÿÿ--û úçú	ú"-óúçú--ð'ÿÿ--ï@¦À	ú"-éú¤ú--ð'ÿÿ--® úú	ú"-¦úú--ð'ÿÿ--@úÀñù	ú"-úïù--ð'ÿÿ--®ùùäù	ú"-ñù¦äù--ð'ÿÿ--È@¦À	ú"-¤äùÂäù--ð'ÿÿ--ÕùùÀäù	ú"-ÀäùÍñù--ð'ÿÿ--@úÀñù	ú"-ÍïùÍú--ð'ÿÿ--Õ úÀú	ú"-ÍúÀú--ð'ÿÿ--:áÿ%Ìÿ	ú"-2Ùÿ%Ìÿ--ð'ÿÿ--@ÔÿÀ²ÿ	ú"-%Îÿ%°ÿ--ð'ÿÿ--:ºÿ%¥ÿ	ú"-%²ÿ2¥ÿ--ð'ÿÿ--z@2À	ú"-0¥ÿt¥ÿ--ð'ÿÿ--ºÿr¥ÿ	ú"-r¥ÿ²ÿ--ð'ÿÿ--@ÔÿÀ²ÿ	ú"-°ÿÎÿ--ð'ÿÿ--áÿrÌÿ	ú"-ÌÿrÙÿ--ð'ÿÿ--@%À	ú"-#--ð'ÿÿ--m!%óÿ	ú"-%eóÿ--ð'ÿÿ--@.Àóÿ	ú"-eñÿe(--ð'ÿÿ--z@2À	ú"-ts0s--ð'ÿÿ--:%f	ú"-2s%f--ð'ÿÿ--@nÀM	ú"-%h%K--ð'ÿÿ--:U%@	ú"-%M2@--ð'ÿÿ--z@2À	ú"-0@t@--ð'ÿÿ--Ur@	ú"-r@M--ð'ÿÿ--@nÀM	ú"-Kh--ð'ÿÿ--rf	ú"-frs--ð'ÿÿ--@ÓÀ	ú"-ÿÑÿ--ð'ÿÿ--@DÿÀÿ	ú"-ÓÿÓ>ÿ--ð'ÿÿ--@DÿÀÿ	ú"-Ó>ÿÓÿ--ð'ÿÿ--Û@¬À	ú"-Õÿªÿ--ð'ÿÿ--@QÿÀÿ	ú"-¬ÿ¬Kÿ--ð'ÿÿ--@¬À	ú"-ÿªÿ--ð'ÿÿ--õÿ¬cÿ	ú"-¬ÿícÿ--ð'ÿÿ--@ÿÀcÿ	ú"-íaÿíÿ--ð'ÿÿ--ÁÒÿ¬½ÿ	ú"-¹½ÿ¬Êÿ--ð'ÿÿ--@¬À	ú"-ªÊÿÊÿ--ð'ÿÿ--@ÒÿÀ½ÿ	ú"-Ìÿ»ÿ--ð'ÿÿ--@ßÿÀ½ÿ	ú"-»ÿÙÿ--ð'ÿÿ--7@ûÀ	ú"-1*ýù*ý--ð'ÿÿ--@XýÀ*ý	ú"-û(ýûRý--ð'ÿÿ--@XýÀ*ý	ú"-ûRýû(ý--ð'ÿÿ--@ÕÀ	ú"-ý*ýÓ*ý--ð'ÿÿ--@eýÀ*ý	ú"-Õ(ýÕ_ý--ð'ÿÿ--7@ÕÀ	ú"-1ýÓý--ð'ÿÿ--¥ýÕwý	ú"-Õýwý--ð'ÿÿ--@²ýÀwý	ú"-uý¬ý--ð'ÿÿ--ö@âÀ	ú"-ðÄýàÄý--ð'ÿÿ--êÙýÕÄý	ú"-âÄýÕÑý--ð'ÿÿ--@òýÀÑý	ú"-ÕÏýÕìý--ð'ÿÿ--êÿýÕêý	ú"-Õêýâ÷ý--ð'ÿÿ--ö@âÀ	ú"-à÷ýð÷ý--ð'ÿÿ--*ÿýîÄý	ú"-î÷ý"Äý--ð'ÿÿ--7@"À	ú"- Äý1Äý--ð'ÿÿ--@ÿýÀÄý	ú"-/Âý/ùý--ð'ÿÿ--@bÀ	ú"-V`V--ð'ÿÿ--@ÀV	ú"-bTb--ð'ÿÿ--@ÀV	ú"-bbT--ð'ÿÿ--j@;À	ú"-dV9V--ð'ÿÿ--@ÀV	ú"-;T;--ð'ÿÿ--@;À	ú"-Ê9Ê--ð'ÿÿ--Ò;¤	ú"-;Ê|¤--ð'ÿÿ--@ßÀ¤	ú"-|¢|Ù--ð'ÿÿ--P;ñ	ú"-Hñ;þ--ð'ÿÿ--@Àþ	ú"-;ü;--ð'ÿÿ--P,;	ú"-;H$--ð'ÿÿ--]@HÀ	ú"-F$W$--ð'ÿÿ--j,U	ú"-U$b--ð'ÿÿ--@Àþ	ú"-bbü--ð'ÿÿ--@Àþ	ú"-büb--ð'ÿÿ--w,b	ú"-bo$--ð'ÿÿ--@oÀ	ú"-m$$--ð'ÿÿ--,	ú"-$--ð'ÿÿ--@Àþ	ú"-ü--ð'ÿÿ--ñ	ú"-þñ--ð'ÿÿ--á@À	ú"-ÙÅþÿ--ð'ÿÿ--å@À	ú"-ÿÝÄþ--ð'ÿÿ--ä@À	ú"-ÜÅþÿ--ð'ÿÿ--é@À	ú"-ÿáÄþ--ð'ÿÿ--ä@À	ú"-ÜÇþÿ--ð'ÿÿ--é@À	ú"-ÿáÇþ--ð'ÿÿ--ä@À	ú"-ÜËþÿ--ð'ÿÿ--é@À	ú"-ÿáËþ--ð'ÿÿ--å@À	ú"-ÝÏþÿ--ð'ÿÿ--ê@À	ú"-ÿâÐþ--ð'ÿÿ--æ@À	ú"-ÞÓþÿ--ð'ÿÿ--ì@À	ú"-ÿäÔþ--ð'ÿÿ--è@À	ú"-à×þÿ--ð'ÿÿ--î@À	ú"-ÿæØþ--ð'ÿÿ--ê@À	ú"-âÛþÿ--ð'ÿÿ--ð@À	ú"- ÿèÛþ--ð'ÿÿ--ì@À	ú"-äÝþ!ÿ--ð'ÿÿ--ò@À	ú"-"ÿêÜþ--ð'ÿÿ--ê@ À	ú"-âàþ "ÿ--ð'ÿÿ--ï@!À	ú"-!"ÿçÞþ--ð'ÿÿ--@ÓþÀ¢þ	ú"-Ëþ¢þ--ð'ÿÿ--@ÕþÀ¡þ	ú"-¡þÍþ--ð'ÿÿ--@ÓþÀþ	ú"-Ëþþ--ð'ÿÿ--@ÖþÀþ	ú"-þÎþ--ð'ÿÿ--@ÑþÀþ	ú"-Éþþ--ð'ÿÿ--@ØþÀþ	ú"-þÐþ--ð'ÿÿ--@ÔþÀþ	ú"-Ìþþ--ð'ÿÿ--@ØþÀþ	ú"-þÐþ--ð'ÿÿ--@ÔþÀþ	ú"-Ìþ~þ--ð'ÿÿ--@ØþÀþ	ú"-þÐþ--ð'ÿÿ--@ÕþÀþ	ú"-Íþþ--ð'ÿÿ--@ÚþÀþ	ú"-yþÒþ--ð'ÿÿ--@ØþÀþ	ú"-Ðþxþ--ð'ÿÿ--@ÝþÀ¡þ	ú"-w¡þÕþ--ð'ÿÿ--@ÛþÀ£þ	ú"-Óþv£þ--ð'ÿÿ--@ÝþÀ¤þ	ú"-u¤þÕþ--ð'ÿÿ--@ÚþÀ¥þ	ú"-Òþt¥þ--ð'ÿÿ--@àþÀ§þ	ú"-t§þØþ--ð'ÿÿ--@ÚþÀ©þ	ú"-Òþt©þ--ð'ÿÿ--@àþÀªþ	ú"-uªþØþ--ð'ÿÿ--@À­ÿ	ú"-²­ÿÀ--ð'ÿÿ--@À©ÿ	ú"-Á²©ÿ--ð'ÿÿ--@À®ÿ	ú"-³®ÿÁ--ð'ÿÿ--@Àªÿ	ú"-Â³ªÿ--ð'ÿÿ--@À®ÿ	ú"-µ®ÿÄ--ð'ÿÿ--@Àªÿ	ú"-Å·ªÿ--ð'ÿÿ--@À®ÿ	ú"-¸®ÿÆ--ð'ÿÿ--@Àªÿ	ú"-Èºªÿ--ð'ÿÿ--@À¯ÿ	ú"-½¯ÿË--ð'ÿÿ--@Àªÿ	ú"-Ì¿ªÿ--ð'ÿÿ--@À®ÿ	ú"-Á®ÿÎ--ð'ÿÿ--@Àªÿ	ú"-ÑÃªÿ--ð'ÿÿ--@À®ÿ	ú"-Å®ÿÓ--ð'ÿÿ--@À©ÿ	ú"-ÔÇ©ÿ--ð'ÿÿ--@À­ÿ	ú"-É­ÿÖ--ð'ÿÿ--@À¨ÿ	ú"-ØÊ¨ÿ--ð'ÿÿ--@À­ÿ	ú"-Ì­ÿÙ--ð'ÿÿ--@À¨ÿ	ú"-ÚÌ¨ÿ--ð'ÿÿ--@À¬ÿ	ú"-Í¬ÿÚ--ð'ÿÿ--@À§ÿ	ú"-ÚÍ§ÿ--ð'ÿÿ--ësÿGÿ	ú"-ãÿGkÿ--ð'ÿÿ--ïtÿGþþ	ú"-Glÿçþþ--ð'ÿÿ--ëtÿGÿ	ú"-ãÿGlÿ--ð'ÿÿ--ðuÿGÿþ	ú"-Gmÿèÿþ--ð'ÿÿ--ìvÿHÿ	ú"-äÿHnÿ--ð'ÿÿ--ñxÿIÿ	ú"-Ipÿéÿ--ð'ÿÿ--òyÿIÿ	ú"-êÿIqÿ--ð'ÿÿ--òÿJÿ	ú"-Jsÿêÿ--ð'ÿÿ--ô|ÿLÿ	ú"-ìÿLtÿ--ð'ÿÿ--õ~ÿM	ÿ	ú"-Mvÿí	ÿ--ð'ÿÿ--öÿNÿ	ú"-îÿNxÿ--ð'ÿÿ--÷ÿOÿ	ú"-Oyÿïÿ--ð'ÿÿ--ùÿPÿ	ú"-ñÿPÿ--ð'ÿÿ--úÿRÿ	ú"-Rÿòÿ--ð'ÿÿ--÷ÿSÿ	ú"-ïÿS~ÿ--ð'ÿÿ--üÿTÿ	ú"-Tÿôÿ--ð'ÿÿ--ùÿTÿ	ú"-ñÿTÿ--ð'ÿÿ--þÿUÿ	ú"-Uÿöÿ--ð'ÿÿ--úÿUÿ	ú"-òÿUÿ--ð'ÿÿ--þÿVÿ	ú"-Vÿöÿ--ð'ÿÿ--l@³À	ú"-³ùþd+ÿ--ð'ÿÿ--m@°À	ú"-e,ÿ°øþ--ð'ÿÿ--n@¶À	ú"-¶ùþf+ÿ--ð'ÿÿ--p@¯À	ú"-h+ÿ¯öþ--ð'ÿÿ--q@µÀ	ú"-µöþi*ÿ--ð'ÿÿ--r@²À	ú"-j*ÿ²óþ--ð'ÿÿ--t@¸À	ú"-¸óþl(ÿ--ð'ÿÿ--u@µÀ	ú"-m'ÿµðþ--ð'ÿÿ--u@¶À	ú"-¶îþm%ÿ--ð'ÿÿ--v@²À	ú"-n$ÿ²êþ--ð'ÿÿ--w@¸À	ú"-¸êþo"ÿ--ð'ÿÿ--w@³À	ú"-o ÿ³æþ--ð'ÿÿ--x@½À	ú"-½æþpÿ--ð'ÿÿ--w@¸À	ú"-oÿ¸ãþ--ð'ÿÿ--w@½À	ú"-½âþoÿ--ð'ÿÿ--v@·À	ú"-nÿ·Þþ--ð'ÿÿ--v@»À	ú"-»Þþnÿ--ð'ÿÿ--u@ºÀ	ú"-mÿºÝþ--ð'ÿÿ--t@½À	ú"-½Ýþlÿ--ð'ÿÿ--s@·À	ú"-kÿ·Ûþ--ð'ÿÿ--@~þÀìý	ú"-bìýMvþ--ð'ÿÿ--@þÀãý	ú"-Mwþcãý--ð'ÿÿ--@þÀêý	ú"-bêýMxþ--ð'ÿÿ--@þÀçý	ú"-Nzþdçý--ð'ÿÿ--@þÀèý	ú"-eèýOþ--ð'ÿÿ--@þÀåý	ú"-P|þgåý--ð'ÿÿ--@þÀëý	ú"-hëýQþ--ð'ÿÿ--@þÀèý	ú"-R~þkèý--ð'ÿÿ--@þÀíý	ú"-líýUþ--ð'ÿÿ--@þÀéý	ú"-Vþoéý--ð'ÿÿ--@þÀîý	ú"-qîýXþ--ð'ÿÿ--@þÀêý	ú"-Zþtêý--ð'ÿÿ--@þÀîý	ú"-vîýþ--ð'ÿÿ--@þÀéý	ú"-^þxéý--ð'ÿÿ--@þÀíý	ú"-yíý_þ--ð'ÿÿ--@þÀèý	ú"-a~þ|èý--ð'ÿÿ--@þÀðý	ú"-|ðýbþ--ð'ÿÿ--@þÀêý	ú"-c|þ~êý--ð'ÿÿ--@þÀíý	ú"-~íýdþ--ð'ÿÿ--@þÀìý	ú"-dzþìý--ð'ÿÿ--Týêðü	ú"-êLýðü--ð'ÿÿ--Týéðü	ú"-ðüéLý--ð'ÿÿ--Týéðü	ú"-éLýðü--ð'ÿÿ--Sýéîü	ú"-îüéKý--ð'ÿÿ--Rýéîü	ú"-éJýîü--ð'ÿÿ--Qýèíü	ú"-íüèIý--ð'ÿÿ--Pýçìü	ú"-çHýìü--ð'ÿÿ--Oýæëü	ú"-ëüæGý--ð'ÿÿ--Nýæéü	ú"-æFýéü--ð'ÿÿ--Lýåèü	ú"-èüåDý--ð'ÿÿ--Jýäæü	ú"-äBýæü--ð'ÿÿ--Iýãåü	ú"-åüãAý--ð'ÿÿ--Hýãäü	ú"-ã@ýäü--ð'ÿÿ--Gýâãü	ú"-ãüâ?ý--ð'ÿÿ--Fýááü	ú"-á>ýáü--ð'ÿÿ--Dýààü	ú"-àüà<ý--ð'ÿÿ--Dýàßü	ú"-à<ýßü--ð'ÿÿ--Cýàßü	ú"-ßüà;ý--ð'ÿÿ--Cýßßü	ú"-ß;ýßü--ð'ÿÿ--CýßÞü	ú"-Þüß;ý--ð'ÿÿ--9@®À	ú"-®:ý1iý--ð'ÿÿ--:@¦À	ú"-2iý¦7ý--ð'ÿÿ--<@­À	ú"-­8ý4iý--ð'ÿÿ--=@ªÀ	ú"-5iýª7ý--ð'ÿÿ--?@¬À	ú"-¬5ý7hý--ð'ÿÿ--@@©À	ú"-8gý©3ý--ð'ÿÿ--B@¯À	ú"-¯3ý:fý--ð'ÿÿ--C@¬À	ú"-;eý¬/ý--ð'ÿÿ--D@±À	ú"-±/ý<cý--ð'ÿÿ--D@®À	ú"-<aý®,ý--ð'ÿÿ--E@´À	ú"-´+ý=`ý--ð'ÿÿ--F@¯À	ú"->^ý¯'ý--ð'ÿÿ--F@´À	ú"-´&ý>--ð'ÿÿ--F@°À	ú"->Zý°"ý--ð'ÿÿ--F@´À	ú"-´"ý>Yý--ð'ÿÿ--E@¯À	ú"-=Wý¯ý--ð'ÿÿ--E@·À	ú"-· ý=Vý--ð'ÿÿ--D@±À	ú"-<Tý±ý--ð'ÿÿ--C@µÀ	ú"-µý;Tý--ð'ÿÿ--B@´À	ú"-:Sý´ý--ð'ÿÿ--@µüÀùû	ú"-vùûO­ü--ð'ÿÿ--@¶üÀöû	ú"-N®üwöû--ð'ÿÿ--@¸üÀýû	ú"-výûO°ü--ð'ÿÿ--@¹üÀõû	ú"-O±üyõû--ð'ÿÿ--@ºüÀûû	ú"-yûûP²ü--ð'ÿÿ--@¼üÀøû	ú"-Q´üøû--ð'ÿÿ--@½üÀþû	ú"-|þûRµü--ð'ÿÿ--@¾üÀöû	ú"-T¶üöû--ð'ÿÿ--@¿üÀüû	ú"-üûU·ü--ð'ÿÿ--@¿üÀøû	ú"-W·üøû--ð'ÿÿ--@ÀüÀýû	ú"-ýûY¸ü--ð'ÿÿ--@ÀüÀùû	ú"-[¸üùû--ð'ÿÿ--@ÀüÀýû	ú"-ýû]¸ü--ð'ÿÿ--@ÀüÀýû	ú"-_¸üýû--ð'ÿÿ--@¿üÀü	ú"-ü`·ü--ð'ÿÿ--@¿üÀüû	ú"-b·üüû--ð'ÿÿ--@¾üÀÿû	ú"-ÿûc¶ü--ð'ÿÿ--@½üÀþû	ú"-dµüþû--ð'ÿÿ--@¼üÀü	ú"-üe´ü--ð'ÿÿ--@»üÀüû	ú"-e³üüû--ð'ÿÿ--ï@;À	ú"-;ýç?ý--ð'ÿÿ--ï@8À	ú"-ç>ý8ý--ð'ÿÿ--ï@<À	ú"-<ýç>ý--ð'ÿÿ--ï@7À	ú"-ç<ý7ý--ð'ÿÿ--î@;À	ú"-;ýæ;ý--ð'ÿÿ--î@7À	ú"-æ:ý7ý--ð'ÿÿ--í@6À	ú"-6ýå9ý--ð'ÿÿ--í@5À	ú"-å7ý5ý--ð'ÿÿ--ì@4À	ú"-4ýä5ý--ð'ÿÿ--ë@3À	ú"-ã3ý3ý--ð'ÿÿ--ê@2À	ú"-2ýâ1ý--ð'ÿÿ--é@1À	ú"-á/ý1ý--ð'ÿÿ--è@0À	ú"-0ýà-ý--ð'ÿÿ--ç@0À	ú"-ß,ý0ý--ð'ÿÿ--æ@3À	ú"-3ýÞ*ý--ð'ÿÿ--æ@.À	ú"-Þ)ý.ý--ð'ÿÿ--å@1À	ú"-1yýÝ(ý--ð'ÿÿ--ä@,À	ú"-Ü'ý,zý--ð'ÿÿ--ä@1À	ú"-1xýÜ'ý--ð'ÿÿ--ã@,À	ú"-Û'ý,yý--ð'ÿÿ--Ñ; 	ú"-Éø; --ð'ÿÿ--Ó9 	ú"-9 Ëü--ð'ÿÿ--Ïþ8	ú"-Çö8--ð'ÿÿ--Ó7	ú"-7Ëþ--ð'ÿÿ--Î6	ú"-Æú6--ð'ÿÿ--Ï5	ú"-5Çþ--ð'ÿÿ--Ê2	ú"-Âû2--ð'ÿÿ--Ë1	ú"-1Ã--ð'ÿÿ--Æ/ 	ú"-¾ü/ --ð'ÿÿ--Æ	-!	ú"--!¾--ð'ÿÿ--Á+"	ú"-¹þ+"--ð'ÿÿ--Â*#	ú"-*#º--ð'ÿÿ--¾)%	ú"-¶)%--ð'ÿÿ--¿(&	ú"-(&·--ð'ÿÿ--»''	ú"-³''--ð'ÿÿ--½%)	ú"-%)µ--ð'ÿÿ--º%*	ú"-²%*--ð'ÿÿ--º%,	ú"-%,²--ð'ÿÿ--·%-	ú"-¯%---ð'ÿÿ--º%.	ú"-%.²--ð'ÿÿ--aÿÕþ<	ú"-Yÿ<Õþ	--ð'ÿÿ--cÿÕþ9	ú"-Õþ[ÿ9--ð'ÿÿ--`ÿÕþ?	ú"-Xÿ?Õþ--ð'ÿÿ--eÿÕþ8	ú"-Õþ]ÿ8--ð'ÿÿ--cÿÕþ>	ú"-[ÿ>Õþ--ð'ÿÿ--gÿÖþ;	ú"-Öþ_ÿ;--ð'ÿÿ--eÿ×þA	ú"-]ÿA×þ--ð'ÿÿ--iÿØþ>	ú"-Øþaÿ>--ð'ÿÿ--hÿÚþD	ú"-`ÿDÚþ--ð'ÿÿ--lÿÛþA	ú"-ÛþdÿA--ð'ÿÿ--lÿÜþG	ú"-dÿGÜþ--ð'ÿÿ--qÿÞþC	ú"-ÞþiÿC--ð'ÿÿ--pÿàþH	ú"-hÿHàþ--ð'ÿÿ--uÿâþE	ú"-âþmÿE--ð'ÿÿ--tÿãþI	ú"-lÿIãþ--ð'ÿÿ--xÿ åþE	ú"-åþpÿE--ð'ÿÿ--wÿæþI	ú"-oÿIæþ--ð'ÿÿ--yÿçþI	ú"-çþqÿI--ð'ÿÿ--wÿèþL	ú"-oÿLèþ--ð'ÿÿ--ÿéþG	ú"-éþsÿG--ð'ÿÿ--3ÿ@(þÀ	ú"-(þ¼ÿ+ÿ­ÿ--ð'ÿÿ--4ÿ@%þÀ	ú"-,ÿ¬ÿ%þ¼ÿ--ð'ÿÿ--5ÿ@+þÀ	ú"-+þ»ÿ-ÿ¬ÿ--ð'ÿÿ--6ÿ@"þÀ	ú"-.ÿ«ÿ"þºÿ--ð'ÿÿ--7ÿ@(þÀ	ú"-(þ¹ÿ/ÿªÿ--ð'ÿÿ--7ÿ@$þÀ	ú"-/ÿ¨ÿ$þ·ÿ--ð'ÿÿ--8ÿ@*þÀ	ú"-*þµÿ0ÿ§ÿ--ð'ÿÿ--8ÿ@%þÀ	ú"-0ÿ¥ÿ%þ³ÿ--ð'ÿÿ--9ÿ@+þÀ	ú"-+þ±ÿ1ÿ£ÿ--ð'ÿÿ--9ÿ@&þÀ	ú"-1ÿ¡ÿ&þ®ÿ--ð'ÿÿ--9ÿ@+þÀ	ú"-+þ¬ÿ1ÿÿ--ð'ÿÿ--8ÿ@%þÀ	ú"-0ÿÿ%þªÿ--ð'ÿÿ--8ÿ@*þÀ	ú"-*þ§ÿ0ÿÿ--ð'ÿÿ--7ÿ@$þÀ	ú"-/ÿÿ$þ¥ÿ--ð'ÿÿ--7ÿ@(þÀ	ú"-(þ£ÿ/ÿÿ--ð'ÿÿ--6ÿ@"þÀ	ú"-.ÿÿ"þ¡ÿ--ð'ÿÿ--5ÿ@&þÀ	ú"-&þ ÿ-ÿÿ--ð'ÿÿ--4ÿ@$þÀ	ú"-,ÿÿ$þÿ--ð'ÿÿ--3ÿ@(þÀ	ú"-(þÿ+ÿÿ--ð'ÿÿ--1ÿ@!þÀ	ú"-)ÿÿ!þÿ--ð'ÿÿ--ÿäþÿþ	ú"-ÿÜþÿþ--ð'ÿÿ--ÿçþÿþ	ú"-ÿþÿßþ--ð'ÿÿ--ÿáþÿþ	ú"-ÿÙþÿþ--ð'ÿÿ--ÿêþÿþ	ú"-ÿþÿâþ--ð'ÿÿ--ÿåþÿþ	ú"-ÿÝþÿþ--ð'ÿÿ--ÿéþÿþ	ú"-ÿþÿáþ--ð'ÿÿ--ÿåþÿþ	ú"-ÿÝþÿþ--ð'ÿÿ--ÿêþÿþ	ú"-ÿþ~ÿâþ--ð'ÿÿ--ÿæþ	ÿþ	ú"-yÿÞþ	ÿþ--ð'ÿÿ--ÿëþÿþ	ú"-ÿþzÿãþ--ð'ÿÿ--ÿèþÿþ	ú"-uÿàþÿþ--ð'ÿÿ--ÿíþÿþ	ú"-ÿþuÿåþ--ð'ÿÿ--yÿëþÿþ	ú"-qÿãþÿþ--ð'ÿÿ--zÿðþÿþ	ú"-ÿþrÿèþ--ð'ÿÿ--wÿíþÿþ	ú"-oÿåþÿþ--ð'ÿÿ--xÿóþÿþ	þ	ú"-ÿþ	þpÿëþ--ð'ÿÿ--@ñþÀþ	ú"-mÿéþÿþþ--ð'ÿÿ--uÿòþþþþ	ú"-þþþmÿêþ--ð'ÿÿ--@ïþÀþ	ú"-jÿçþÿþþ--ð'ÿÿ--@ôþÀþ	ú"-ÿþþmÿìþ--ð'ÿÿ--ÿþ	ú"-þüþ--ð'ÿÿ--ÿþ	ú"-ýþþ--ð'ÿÿ--ÿþ	ú"-þþþ--ð'ÿÿ--ÿþ	ú"-ÿþþ--ð'ÿÿ--ÿþ	ú"-þÿ--ð'ÿÿ--ÿþ	ú"-ÿþ--ð'ÿÿ--ÿþ	ú"-þÿ--ð'ÿÿ--ÿþ	ú"-ÿþ--ð'ÿÿ--ÿþ	ú"-þÿ--ð'ÿÿ-- ÿþ	ú"-ÿþ--ð'ÿÿ-- ÿþ	ú"-þÿ--ð'ÿÿ--¥ÿ"þ	ú"-"ÿþ--ð'ÿÿ--¥ÿ# þ	ú"- þ#	ÿ--ð'ÿÿ--©ÿ%þ	ú"-%	ÿ¡þ--ð'ÿÿ--©ÿ' þ	ú"-¡ þ'	ÿ--ð'ÿÿ--­ÿ)þ	ú"-)	ÿ¥þ--ð'ÿÿ--­ÿ* þ	ú"-¥ þ*	ÿ--ð'ÿÿ--®ÿ+þ	ú"-+ÿ¦þ--ð'ÿÿ--­ÿ,"þ	ú"-¥"þ,ÿ--ð'ÿÿ--°ÿ,þ	ú"-,ÿ¨þ--ð'ÿÿ--@ À	ú"- ±ÿ¼ÿ--ð'ÿÿ--@À	ú"-¼ÿ±ÿ--ð'ÿÿ--@¢À	ú"-¢±ÿ»ÿ--ð'ÿÿ--@À	ú"-ºÿ¯ÿ--ð'ÿÿ--@À	ú"-®ÿºÿ--ð'ÿÿ-- @À	ú"-¸ÿ¬ÿ--ð'ÿÿ--¡@¢À	ú"-¢«ÿ·ÿ--ð'ÿÿ--¡@À	ú"-µÿ¨ÿ--ð'ÿÿ--¢@£À	ú"-£§ÿ³ÿ--ð'ÿÿ--¢@À	ú"-²ÿ¤ÿ--ð'ÿÿ--¢@£À	ú"-£¢ÿ°ÿ--ð'ÿÿ--¢@À	ú"-®ÿ ÿ--ð'ÿÿ--¢@£À	ú"-£ÿ¬ÿ--ð'ÿÿ--¡@À	ú"-ªÿÿ--ð'ÿÿ--¡@¢À	ú"-¢ÿ¨ÿ--ð'ÿÿ-- @À	ú"-§ÿÿ--ð'ÿÿ-- @ À	ú"- ÿ¦ÿ--ð'ÿÿ--@À	ú"-¦ÿÿ--ð'ÿÿ--@£À	ú"-£ÿ¥ÿ--ð'ÿÿ--@À	ú"-¥ÿÿ--ð'ÿÿ--@ÀÓ	ú"-ãÓÔ--ð'ÿÿ--@ÀÏ	ú"-ÔäÏ--ð'ÿÿ--@ÀÔ	ú"-äÔÕ--ð'ÿÿ--@ÀÏ	ú"-ÖåÏ--ð'ÿÿ--@ÀÕ	ú"-æÕ×--ð'ÿÿ--@ÀÐ	ú"-ØçÐ--ð'ÿÿ--@ÀÐ	ú"-êÐÚ--ð'ÿÿ--@ÀÐ	ú"-ÜëÐ--ð'ÿÿ--@ÀÑ	ú"-íÑÞ--ð'ÿÿ--@ÀÑ	ú"-àðÑ--ð'ÿÿ--@ÀÑ	ú"-òÑâ--ð'ÿÿ--@ÀÑ	ú"-äôÑ--ð'ÿÿ--@ÀÑ	ú"-öÑæ--ð'ÿÿ--@ÀÑ	ú"-èøÑ--ð'ÿÿ--@ÀÖ	ú"-ùÖê--ð'ÿÿ--@ÀÑ	ú"-ëüÑ--ð'ÿÿ--@ÀÖ	ú"-üÖì--ð'ÿÿ--@ÀÑ	ú"-íþÑ--ð'ÿÿ--@ÀÖ	ú"-þÖî--ð'ÿÿ--@ÀÑ	ú"-îþÑ--ð'ÿÿ--¡?	ú"-u?--ð'ÿÿ--¢	:	ú"-	:--ð'ÿÿ--~£?	ú"-v?--ð'ÿÿ--¥=	ú"-y=--ð'ÿÿ--¦?	ú"-y?--ð'ÿÿ--¨=	ú"- =--ð'ÿÿ--ªC	ú"-yC¢--ð'ÿÿ--«	B	ú"-	£~B--ð'ÿÿ--­G	ú"-|G¥--ð'ÿÿ--¯F	ú"-§F--ð'ÿÿ--°K	ú"-~K¨--ð'ÿÿ--±J	ú"-©J--ð'ÿÿ--²N	ú"-Nª--ð'ÿÿ--³L	ú"-«L--ð'ÿÿ--´P	ú"-P¬--ð'ÿÿ--µN	ú"-­N--ð'ÿÿ--µT	ú"-T­--ð'ÿÿ--µP	ú"-­P--ð'ÿÿ--´S	ú"-S¬--ð'ÿÿ--³R	ú"-«R--ð'ÿÿ--®·3	ú"-¦¯3--ð'ÿÿ--°¹2	ú"-2¨±--ð'ÿÿ--ªµ2	ú"-¢­2--ð'ÿÿ--°»1	ú"-1¨³--ð'ÿÿ--ª¸1	ú"-¢°1--ð'ÿÿ--¬¼2	ú"-2¤´--ð'ÿÿ--§¹2	ú"-±2--ð'ÿÿ--¬Á3	ú"-3¤¹--ð'ÿÿ--¦¿4	ú"-·4--ð'ÿÿ--¨Ä5	ú"-5 ¼--ð'ÿÿ--£Â6	ú"-º6--ð'ÿÿ--¥È8	ú"-8À--ð'ÿÿ-- Æ:	ú"-¾:--ð'ÿÿ--È;	ú"-;À--ð'ÿÿ--Ç=	ú"-¿=--ð'ÿÿ--Ì?	ú"-?Ä--ð'ÿÿ--Ë@	ú"-Ã@--ð'ÿÿ--ÌA	ú"-AÄ--ð'ÿÿ--ËB	ú"-ÃB--ð'ÿÿ--ÏC	ú"-CÇ--ð'ÿÿ--ÿÿ*	ú"-ÿÿ*--ð'ÿÿ--ÿÿ*	ú"-ÿ*ÿ--ð'ÿÿ--ÿÿ)	ú"-ÿÿ)--ð'ÿÿ--ÿÿ)	ú"-ÿ)ÿ--ð'ÿÿ--ÿÿ)	ú"-ÿÿ)--ð'ÿÿ--ÿÿ*	ú"-ÿ*ÿ--ð'ÿÿ--ÿÿ*	ú"-ÿÿ*--ð'ÿÿ--ÿ	ÿ,	ú"-	ÿ,ÿ--ð'ÿÿ--ÿÿ-	ú"-zÿÿ---ð'ÿÿ--ÿÿ.	ú"-ÿ.|ÿ--ð'ÿÿ--~ÿÿ/	ú"-vÿÿ/--ð'ÿÿ--ÿÿ1	ú"-ÿ1yÿ--ð'ÿÿ--|ÿÿ3	ú"-tÿÿ3--ð'ÿÿ--ÿÿ4	ú"-ÿ4wÿ--ð'ÿÿ--ÿÿ6	ú"-sÿÿ6--ð'ÿÿ--~ÿ£ÿ8	ú"-ÿ8vÿ--ð'ÿÿ--wÿÿ9	ú"-oÿÿ9--ð'ÿÿ--|ÿ£ÿ:	ú"-ÿ:tÿ--ð'ÿÿ--yÿ¢ÿ;	ú"-qÿÿ;--ð'ÿÿ--zÿ£ÿ<	ú"-ÿ<rÿ--ð'ÿÿ--@ÀG	ú"-ÚÿÛÿG--ð'ÿÿ--@ÀG	ú"-ÛÿGÚÿ--ð'ÿÿ--@ÀG	ú"-ÚÿÚÿE--ð'ÿÿ--@ÀG	ú"-ÚÿGÙÿ--ð'ÿÿ--@ÀG	ú"-ØÿØÿE--ð'ÿÿ--@ÀG	ú"-×ÿE×ÿ--ð'ÿÿ--@ÀG	ú"-ÖÿÖÿE--ð'ÿÿ--@ÀG	ú"-ÕÿGÔÿ--ð'ÿÿ--@ÀG	ú"-ÓÿÓÿE--ð'ÿÿ--@ÀG	ú"-ÑÿEÑÿ--ð'ÿÿ--@ÀG	ú"-ÏÿÐÿG--ð'ÿÿ--@ÀG	ú"-ÎÿEÎÿ--ð'ÿÿ--@ÀG	ú"-ÌÿÍÿG--ð'ÿÿ--@ÀG	ú"-ËÿEËÿ--ð'ÿÿ--@ÀG	ú"-ÉÿÊÿG--ð'ÿÿ--@ÀG	ú"-ÉÿGÈÿ--ð'ÿÿ--@ÀG	ú"-ÈÿÈÿE--ð'ÿÿ--@ÀG	ú"-ÇÿEÇÿ--ð'ÿÿ--@ÀG	ú"-ÇÿÇÿE--ð'ÿÿ--@ÀG	ú"-ÇÿGÆÿ--ð'ÿÿ--@ÀÍ	ú"-ÐþÁþÍ--ð'ÿÿ--@ÀÍ	ú"-ÁþÍÑþ--ð'ÿÿ--@ÀÌ	ú"-ÏþÁþÌ--ð'ÿÿ--@ÀÌ	ú"-ÀþÌÏþ--ð'ÿÿ--@ÀÌ	ú"-Íþ¿þÌ--ð'ÿÿ--@ÀÌ	ú"-½þÌÌþ--ð'ÿÿ--@ÀÌ	ú"-Ëþ»þÌ--ð'ÿÿ--@ÀÌ	ú"-¹þÌÈþ--ð'ÿÿ--@ÀÌ	ú"-Æþ¸þÌ--ð'ÿÿ--@ÀÌ	ú"-µþÌÄþ--ð'ÿÿ--@ÀÍ	ú"-Âþ³þÍ--ð'ÿÿ--@ÀÍ	ú"-±þÍÀþ--ð'ÿÿ--@ÀÍ	ú"-¾þ¯þÍ--ð'ÿÿ--@ÀÍ	ú"-­þÍ¼þ--ð'ÿÿ--@ÀÍ	ú"-ºþ«þÍ--ð'ÿÿ--@ÀÎ	ú"-ªþÎ¹þ--ð'ÿÿ--@ÀÎ	ú"-·þ©þÎ--ð'ÿÿ--@ÀÏ	ú"-¨þÏ·þ--ð'ÿÿ--@ÀÏ	ú"-µþ§þÏ--ð'ÿÿ--@ÀÏ	ú"-§þÏµþ--ð'ÿÿ--vþÊêýB	ú"-nþBêýÂ--ð'ÿÿ--yþÊêý@	ú"-êýÂqþ@--ð'ÿÿ--uþËéýE	ú"-mþEéýÃ--ð'ÿÿ--þÍéý@	ú"-éýÅsþ@--ð'ÿÿ--xþÏéýE	ú"-pþEéýÇ--ð'ÿÿ--|þÐéýC	ú"-éýÈtþC--ð'ÿÿ--yþÒéýI	ú"-qþIéýÊ--ð'ÿÿ--þÓêýH	ú"-êýËuþH--ð'ÿÿ--þÕëýI	ú"-wþIëýÍ--ð'ÿÿ--þÖìýH	ú"-ìýÎþH--ð'ÿÿ--þØíýM	ú"-yþMíýÐ--ð'ÿÿ--þÙîýL	ú"-îýÑþL--ð'ÿÿ--þÚðýT	ú"-zþTðýÒ--ð'ÿÿ--þÛòýR	ú"-òýÓþR--ð'ÿÿ--þÜóýU	ú"-~þUóýÔ--ð'ÿÿ--þÜõýS	ú"-õýÔþS--ð'ÿÿ--þÜ÷ýV	ú"-þV÷ýÔ--ð'ÿÿ--þÜøýU	ú"-øýÔþU--ð'ÿÿ--þÛùýX	ú"-þXùýÓ--ð'ÿÿ--þÛúýT	ú"-úýÓþT--ð'ÿÿ--@MÀ|	ú"-õ|E--ð'ÿÿ--@MÀx	ú"-Eõx--ð'ÿÿ--@NÀx	ú"-õxF--ð'ÿÿ--@NÀt	ú"-Fõt--ð'ÿÿ--@OÀy	ú"-øyG--ð'ÿÿ--@OÀu	ú"- Gùu--ð'ÿÿ--@OÀy	ú"-ûy"G--ð'ÿÿ--@OÀu	ú"-#Güu--ð'ÿÿ--@OÀy	ú"-y&G--ð'ÿÿ--@OÀu	ú"-'Gu--ð'ÿÿ--@NÀy	ú"-y)F--ð'ÿÿ--@NÀs	ú"-,Fs--ð'ÿÿ--@MÀx	ú"-x-E--ð'ÿÿ--@MÀr	ú"-/E	r--ð'ÿÿ--@LÀv	ú"-v0D--ð'ÿÿ--@KÀp	ú"-2Cp--ð'ÿÿ--@JÀu	ú"-u3B--ð'ÿÿ--@IÀo	ú"-4Ao--ð'ÿÿ--@IÀw	ú"-w4A--ð'ÿÿ--@HÀr	ú"-4@r--ð'ÿÿ--Ä@À	ú"-#¼--ð'ÿÿ--Æ@À	ú"-¾$--ð'ÿÿ--Ç@À	ú"-"¿--ð'ÿÿ--È@À	ú"-À#--ð'ÿÿ--Ê@À	ú"- Â--ð'ÿÿ--Ë@À	ú"-Ã --ð'ÿÿ--Ì@À	ú"-Ä--ð'ÿÿ--Ì@À	ú"-Ä--ð'ÿÿ--Ì@À	ú"-Ä--ð'ÿÿ--Ì@À	ú"-Ä--ð'ÿÿ--Ì@À	ú"-Ä--ð'ÿÿ--Ì@À	ú"-Ä--ð'ÿÿ--Ê@À	ú"-Â	--ð'ÿÿ--Ê@À	ú"-Â--ð'ÿÿ--È@À	ú"-À--ð'ÿÿ--Ç@À	ú"-¿--ð'ÿÿ--Æ@À	ú"-¾--ð'ÿÿ--Ä@À	ú"-¼--ð'ÿÿ--Â@À	ú"-	º--ð'ÿÿ--Á@À	ú"-¹--ð'ÿÿ--@LÀ	ú"-jLË--ð'ÿÿ--@LÀ	ú"-LËh--ð'ÿÿ--@LÀ	ú"-jLÌ--ð'ÿÿ--@LÀ	ú"-LÍi--ð'ÿÿ--@LÀ	ú"-mLÎ--ð'ÿÿ--@MÀ	ú"-MÏl--ð'ÿÿ--@MÀ	ú"-pMÑ--ð'ÿÿ--@NÀ	ú"-NÓp--ð'ÿÿ--@OÀ	ú"-tOÕ--ð'ÿÿ--!@OÀ	ú"-OÖt--ð'ÿÿ--@PÀ	ú"-xPØ--ð'ÿÿ--#@RÀ	ú"-RÚx--ð'ÿÿ-- @SÀ	ú"-|SÜ--ð'ÿÿ--%@TÀ	ú"-TÝ--ð'ÿÿ--"@TÀ	ú"-Tß--ð'ÿÿ--'@UÀ	ú"-Uà~--ð'ÿÿ--#@VÀ	ú"-Vá--ð'ÿÿ--(@VÀ	ú"-Vâ --ð'ÿÿ--%@WÀ	ú"-Wâ--ð'ÿÿ--)@XÀ	ú"-Xâ!--ð'ÿÿ--@@Ào	ú"-ý8­ýo--ð'ÿÿ--@DÀn	ú"-¬ýný<--ð'ÿÿ--@CÀm	ú"-ý;¬ým--ð'ÿÿ--@GÀl	ú"-«ýlý?--ð'ÿÿ--@AÀk	ú"-ý9«ýk--ð'ÿÿ--@EÀk	ú"-©ýký=--ð'ÿÿ--@@Àj	ú"-ý8§ýj--ð'ÿÿ--@CÀi	ú"-¦ýiý;--ð'ÿÿ--@>Ài	ú"-~ý6¤ýi--ð'ÿÿ--@BÀh	ú"-¢ýhý:--ð'ÿÿ--@=Àh	ú"-yý5 ýh--ð'ÿÿ--@BÀh	ú"-ýhvý:--ð'ÿÿ--@=Àh	ú"-uý5ýh--ð'ÿÿ--@AÀh	ú"-ýhrý9--ð'ÿÿ--@=Àh	ú"-qý5ýh--ð'ÿÿ--@BÀh	ú"-ýhný:--ð'ÿÿ--@=Àh	ú"-ný5ýh--ð'ÿÿ--@CÀi	ú"-ýilý;--ð'ÿÿ--@:Ài	ú"-mý2ýi--ð'ÿÿ--@?Àj	ú"-ýjlý7--ð'ÿÿ--Vþ@#þÀ	ú"-#þ"Nþ'--ð'ÿÿ--Xþ@ þÀ	ú"-Pþ' þ!--ð'ÿÿ--Yþ@"þÀ	ú"-"þ!Qþ'--ð'ÿÿ--[þ@þÀ	ú"-Sþ&þ --ð'ÿÿ--@%þÀ	ú"-%þTþ%--ð'ÿÿ--^þ@þÀ	ú"-Vþ$þ--ð'ÿÿ--_þ@$þÀ	ú"-$þWþ#--ð'ÿÿ--`þ@!þÀ	ú"-Xþ!!þ--ð'ÿÿ--aþ@&þÀ	ú"-&þYþ--ð'ÿÿ--aþ@#þÀ	ú"-Yþ#þ--ð'ÿÿ--bþ@'þÀ	ú"-'þZþ--ð'ÿÿ--bþ@#þÀ	ú"-Zþ#þ--ð'ÿÿ--aþ@'þÀ	ú"-'þYþ--ð'ÿÿ--aþ@#þÀ	ú"-Yþ#þ--ð'ÿÿ--`þ@&þÀ	ú"-&þXþ--ð'ÿÿ--_þ@$þÀ	ú"-Wþ$þ--ð'ÿÿ--^þ@'þÀ	ú"-'þVþ--ð'ÿÿ--@!þÀ	ú"-Tþ!þ--ð'ÿÿ--[þ@(þÀ	ú"-(þ	Sþ--ð'ÿÿ--Zþ@"þÀ	ú"-Rþ"þ--ð'ÿÿ--[ý@üÀ	ú"-SýÄüc--ð'ÿÿ--_ý@üÀ	ú"-ücWýÆ--ð'ÿÿ--Zý@üÀ	ú"-RýÄüc--ð'ÿÿ--]ý@üÀ	ú"-üdUýÇ--ð'ÿÿ--Xý@üÀ	ú"-PýÆüe--ð'ÿÿ--[ý@üÀ	ú"-üfSýÉ--ð'ÿÿ--Wý@üÀ	ú"-OýÉüh--ð'ÿÿ--YýÕüi	ú"-üiQýÍ--ð'ÿÿ--TýÕük	ú"-LýÍük--ð'ÿÿ--Xý@üÀ	ú"-ümPýÐ--ð'ÿÿ--Rý@üÀ	ú"-JýÐüo--ð'ÿÿ--Vý@üÀ	ú"-üqNýÕ--ð'ÿÿ--Qý@üÀ	ú"-IýÕüs--ð'ÿÿ--Tý@üÀ	ú"-ütLýØ--ð'ÿÿ--Oýàüv	ú"-GýØüv--ð'ÿÿ--Sýäüw	ú"-üwKýÜ--ð'ÿÿ--Nýãüy	ú"-FýÛüy--ð'ÿÿ--Rýæüz	ú"-üzJýÞ--ð'ÿÿ--Nýäüz	ú"-FýÜüz--ð'ÿÿ--Sý@üÀ	ú"-üzKýÞ--ð'ÿÿ--eýmÿÂüùþ	ú"-]ýeÿÂüùþ--ð'ÿÿ--iýpÿÁüùþ	ú"-Áüùþaýhÿ--ð'ÿÿ--eýmÿÁüúþ	ú"-]ýeÿÁüúþ--ð'ÿÿ--hýqÿÀüûþ	ú"-Àüûþ`ýiÿ--ð'ÿÿ--cýoÿÀüûþ	ú"-[ýgÿÀüûþ--ð'ÿÿ--fýsÿ¾üýþ	ú"-¾üýþ^ýkÿ--ð'ÿÿ--eýtÿ½üþþ	ú"-]ýlÿ½üþþ--ð'ÿÿ--dýuÿ¼üÿþ	ú"-¼üÿþmÿ--ð'ÿÿ--cýxÿ»üÿ	ú"-[ýpÿ»üÿ--ð'ÿÿ--aýyÿºüÿ	ú"-ºüÿYýqÿ--ð'ÿÿ--`ýÿ¸üÿ	ú"-Xýsÿ¸üÿ--ð'ÿÿ--_ýÿ·üÿ	ú"-·üÿWýuÿ--ð'ÿÿ--^ýÿ¶üÿ	ú"-Výwÿ¶üÿ--ð'ÿÿ--]ýÿµüÿ	ú"-µüÿUýxÿ--ð'ÿÿ--Xýÿ´üÿ	ú"-Pýwÿ´üÿ--ð'ÿÿ--[ýÿ´üÿ	ú"-´üÿSýÿ--ð'ÿÿ--Wýÿ³üÿ	ú"-Oýyÿ³üÿ--ð'ÿÿ--Zýÿ³üÿ	ú"-³üÿRýÿ--ð'ÿÿ--Výÿ³üÿ	ú"-Nýÿ³üÿ--ð'ÿÿ--Zýÿ³üÿ	ú"-³üÿRý~ÿ--ð'ÿÿ--@XþÀÆý	ú"-ZüPþAüÆý--ð'ÿÿ--@_þÀÅý	ú"-AüÅý[üWþ--ð'ÿÿ--@YþÀÃý	ú"-ZüQþ@üÃý--ð'ÿÿ--@]þÀÂý	ú"-?üÂýYüUþ--ð'ÿÿ--@ÀÂý	ú"-WüTþ=üÂý--ð'ÿÿ--@_þÀÁý	ú"-<üÁýVüWþ--ð'ÿÿ--@ZþÀÀý	ú"-TüRþ;üÀý--ð'ÿÿ--@^þÀÀý	ú"-9üÀýRüVþ--ð'ÿÿ--@YþÀÀý	ú"-OüQþ7üÀý--ð'ÿÿ--@^þÀÀý	ú"-5üÀýNüVþ--ð'ÿÿ--@ZþÀÀý	ú"-JüRþ3üÀý--ð'ÿÿ--@_þÀÁý	ú"-2üÁýIüWþ--ð'ÿÿ--@ÀÂý	ú"-FüTþ0üÂý--ð'ÿÿ--@aþÀÂý	ú"-.üÂýDüYþ--ð'ÿÿ--@^þÀÃý	ú"-BüVþ-üÃý--ð'ÿÿ--@dþÀÅý	ú"-,üÅýBü--ð'ÿÿ--@ÀÆý	ú"-?üTþ*üÆý--ð'ÿÿ--@cþÀÇý	ú"-*üÇý?ü[þ--ð'ÿÿ--@_þÀÈý	ú"->üWþ*üÈý--ð'ÿÿ--@aþÀÊý	ú"-*üÊý>üYþ--ð'ÿÿ--ü@`ûÀ	ú"-`û ÿüèþ--ð'ÿÿ--ü@]ûÀ	ú"-üèþ]û ÿ--ð'ÿÿ--ü@cûÀ	ú"-cûÿüæþ--ð'ÿÿ--ü@[ûÀ	ú"-üåþ[ûÿ--ð'ÿÿ--ü@aûÀ	ú"-aûÿüäþ--ð'ÿÿ--ü@]ûÀ	ú"-üãþ]ûÿ--ð'ÿÿ--ü@aûÀ	ú"-aûÿüáþ--ð'ÿÿ--ü@YûÀ	ú"-üßþYûÿ--ð'ÿÿ--ü@]ûÀ	ú"-]ûÿüÞþ--ð'ÿÿ--ü@XûÀ	ú"-üÜþXûÿ--ð'ÿÿ--ü@À	ú"-ÿüÚþ--ð'ÿÿ--ü@WûÀ	ú"-üØþWûÿ--ð'ÿÿ--ü@ZûÀ	ú"-Zûÿü×þ--ð'ÿÿ--ü@XûÀ	ú"-üÕþXûÿ--ð'ÿÿ--ü@[ûÀ	ú"-[ûÿüÔþ--ð'ÿÿ--ü@UûÀ	ú"-üÓþUûÿ--ð'ÿÿ--ü@XûÀ	ú"-XûÿüÒþ--ð'ÿÿ--ü@WûÀ	ú"-üÒþWûÿ--ð'ÿÿ--ü@ZûÀ	ú"-ZûÿüÒþ--ð'ÿÿ--ü@SûÀ	ú"-	üÒþSûÿ--ð'ÿÿ--$ý@üÀ	ú"-ü[ýý'ý--ð'ÿÿ--%ý@üÀ	ú"-ý'ýü^ý--ð'ÿÿ--&ý@üÀ	ú"-ü[ýý&ý--ð'ÿÿ--'ý@üÀ	ú"-ý%ýü[ý--ð'ÿÿ--(ý@üÀ	ú"-üZý ý$ý--ð'ÿÿ--(ý@üÀ	ú"- ý"ýüYý--ð'ÿÿ--)ý@üÀ	ú"-üUý!ý ý--ð'ÿÿ--)ý@üÀ	ú"-!ýýüUý--ð'ÿÿ--(ý@üÀ	ú"-üQý ýý--ð'ÿÿ--(ý@üÀ	ú"- ýýüQý--ð'ÿÿ--'ý@üÀ	ú"-üLýýý--ð'ÿÿ--&ý@üÀ	ú"-ýýüLý--ð'ÿÿ--%ý@üÀ	ú"-üHýýý--ð'ÿÿ--$ý@üÀ	ú"-ýýüHý--ð'ÿÿ--#ý@üÀ	ú"-üEýýý--ð'ÿÿ--!ý@üÀ	ú"-ýýüFý--ð'ÿÿ-- ý@üÀ	ú"-üBýýý--ð'ÿÿ--ý@üÀ	ú"-ýýüCý--ð'ÿÿ--ý@üÀ	ú"-üAýýý--ð'ÿÿ--ý@üÀ	ú"-ýýüBý--ð'ÿÿ--ÊûNý!ûéü	ú"-!ûéüÂûFý--ð'ÿÿ--ÊûNý!ûéü	ú"-ÂûFý!ûéü--ð'ÿÿ--ÊûNý"ûèü	ú"-"ûèüÂûFý--ð'ÿÿ--ÊûMý"ûèü	ú"-ÂûEý"ûèü--ð'ÿÿ--ËûMý#ûçü	ú"-#ûçüÃûEý--ð'ÿÿ--ËûLý#ûæü	ú"-ÃûDý#ûæü--ð'ÿÿ--ÌûJý$ûåü	ú"-$ûåüÄûBý--ð'ÿÿ--ÍûIý%ûäü	ú"-ÅûAý%ûäü--ð'ÿÿ--ÎûHý%ûãü	ú"-%ûãüÆû@ý--ð'ÿÿ--ÎûFý&ûáü	ú"-Æû>ý&ûáü--ð'ÿÿ--ÏûEý'ûàü	ú"-'ûàüÇû=ý--ð'ÿÿ--ÐûCý(ûßü	ú"-Èû;ý(ûßü--ð'ÿÿ--ÑûBý(ûÝü	ú"-(ûÝüÉû:ý--ð'ÿÿ--ÑûAý*ûÜü	ú"-Éû9ý*ûÜü--ð'ÿÿ--Òû@ý*ûÛü	ú"-*ûÛüÊû8ý--ð'ÿÿ--Óû?ý+ûÚü	ú"-Ëû7ý+ûÚü--ð'ÿÿ--Óû>ý+ûÙü	ú"-+ûÙüËû6ý--ð'ÿÿ--Ôû=ý+ûØü	ú"-Ìû5ý+ûØü--ð'ÿÿ--Ôû=ý,ûØü	ú"-,ûØüÌû5ý--ð'ÿÿ--Ôû=ý,ûØü	ú"-Ìû5ý,ûØü--ð'ÿÿ--|þ@ÉýÀ	ú"-Éý>ýtþý--ð'ÿÿ--|þ@ÅýÀ	ú"-tþýÅý<ý--ð'ÿÿ--|þ@ÊýÀ	ú"-Êý>ýtþý--ð'ÿÿ--þ@ÆýÀ	ú"-uþýÆý;ý--ð'ÿÿ--þ@ËýÀ	ú"-Ëý<ýuþý--ð'ÿÿ--þ@ÇýÀ	ú"-wþýÇý9ý--ð'ÿÿ--þ@ÈýÀ	ú"-Èý7ýwþý--ð'ÿÿ--þ@ÉýÀ	ú"-xþýÉý5ý--ð'ÿÿ--þ@ÊýÀ	ú"-Êý3ýyþý--ð'ÿÿ--þ@ËýÀ	ú"-zþýËý2ý--ð'ÿÿ--þ@ÌýÀ	ú"-Ìý/ýþý--ð'ÿÿ--þ@ÍýÀ	ú"-|þýÍý-ý--ð'ÿÿ--þ@ÎýÀ	ú"-Îý,ýþý--ð'ÿÿ--þ@ÏýÀ	ú"-~þ~ýÏý*ý--ð'ÿÿ--þ@ÓýÀ	ú"-Óý*ý~þ|ý--ð'ÿÿ--þ@ÐýÀ	ú"-þýÐý'ý--ð'ÿÿ--þ@ÔýÀ	ú"-Ôý'ýþzý--ð'ÿÿ--þ@ÐýÀ	ú"-þyýÐý%ý--ð'ÿÿ--þ@ÔýÀ	ú"-Ôý&ýþxý--ð'ÿÿ--þ@ÐýÀ	ú"-þxýÐý$ý--ð'ÿÿ--@üÀÛû	ú"-[ýü.ýÛû--ð'ÿÿ--@üÀÚû	ú"-.ýÚû[ýü--ð'ÿÿ--@üÀÙû	ú"-Yýü,ýÙû--ð'ÿÿ--@üÀØû	ú"-,ýØûZýü--ð'ÿÿ--@üÀ×û	ú"-Wýü*ý×û--ð'ÿÿ--@üÀ×û	ú"-)ý×ûVýü--ð'ÿÿ--@üÀÖû	ú"-Sýü(ýÖû--ð'ÿÿ--@üÀÖû	ú"-%ýÖûRýü--ð'ÿÿ--@üÀÖû	ú"-Pýü$ýÖû--ð'ÿÿ--@üÀÖû	ú"-"ýÖûNýü--ð'ÿÿ--@üÀ×û	ú"-Kýü ý×û--ð'ÿÿ--@üÀ×û	ú"-ý×ûJýü--ð'ÿÿ--@üÀØû	ú"-EýüýØû--ð'ÿÿ--@üÀÙû	ú"-ýÙûDýü--ð'ÿÿ--@üÀÚû	ú"-BýüýÚû--ð'ÿÿ--@üÀÛû	ú"-ýÛûBýü--ð'ÿÿ--@üÀÝû	ú"-?ýüýÝû--ð'ÿÿ--@üÀÞû	ú"-ýÞû?ýü--ð'ÿÿ--@üÀßû	ú"->ýüýßû--ð'ÿÿ--@¡üÀáû	ú"-ýáû?ýü--ð'ÿÿ--ú@ÆùÀ	ú"-úþþÆù»þ--ð'ÿÿ--ú@ÅùÀ	ú"-Åù»þúÿ--ð'ÿÿ--ú@ÄùÀ	ú"-úÿÄù»þ--ð'ÿÿ--ú@ÃùÀ	ú"-Ãù¼þúÿ--ð'ÿÿ--ú@ÃùÀ	ú"-úÿÃù½þ--ð'ÿÿ--ú@ÂùÀ	ú"-Âù¾þúÿ--ð'ÿÿ--ú@ÁùÀ	ú"-úÿÁù¿þ--ð'ÿÿ--ú@ÀùÀ	ú"-ÀùÁþúÿ--ð'ÿÿ--ú@¿ùÀ	ú"-úÿ¿ùÂþ--ð'ÿÿ--ú@¾ùÀ	ú"-¾ùÄþúÿ--ð'ÿÿ--ú@½ùÀ	ú"-úÿ½ùÆþ--ð'ÿÿ--ú@½ùÀ	ú"-½ùÈþúÿ--ð'ÿÿ--ú@¼ùÀ	ú"-úÿ¼ùÊþ--ð'ÿÿ--ú@¼ùÀ	ú"-¼ùÌþúÿ--ð'ÿÿ--ú@¼ùÀ	ú"-úÿ¼ùÎþ--ð'ÿÿ--ú@¼ùÀ	ú"-¼ùÏþúÿ--ð'ÿÿ--ú@¼ùÀ	ú"-úÿ¼ùÐþ--ð'ÿÿ--ú@¼ùÀ	ú"-¼ùÑþúÿ--ð'ÿÿ--ú@½ùÀ	ú"-úÿ½ùÒþ--ð'ÿÿ--ú@½ùÀ	ú"-½ùÒþúÿ--ð'ÿÿ--@ÿÀÐþ	ú"-ûÐþøúþþ--ð'ÿÿ--@ÿÀÎþ	ú"-øúÿþ	ûÎþ--ð'ÿÿ--@ÿÀÓþ	ú"-ûÓþøúÿ--ð'ÿÿ--@ÿÀÎþ	ú"-øúÿûÎþ--ð'ÿÿ--@ÿÀÓþ	ú"-	ûÓþøúÿ--ð'ÿÿ--@ÿÀÍþ	ú"-ùúÿûÍþ--ð'ÿÿ--@ÿÀÓþ	ú"-ûÓþúúÿ--ð'ÿÿ--@ÿÀÑþ	ú"-ûú	ÿûÑþ--ð'ÿÿ--@ÿÀÖþ	ú"-ûÖþýúÿ--ð'ÿÿ--@ÿÀÓþ	ú"-þúÿûÓþ--ð'ÿÿ--@ÿÀØþ	ú"-ûØþûÿ--ð'ÿÿ--@ÿÀÕþ	ú"-ûÿûÕþ--ð'ÿÿ--@ÿÀØþ	ú"-ûØþûÿ--ð'ÿÿ--@ÿÀÕþ	ú"-ûÿûÕþ--ð'ÿÿ--@ÿÀØþ	ú"-ûØþûÿ--ð'ÿÿ--@ÿÀ×þ	ú"-ûÿû×þ--ð'ÿÿ--@ÿÀÚþ	ú"-ûÚþûÿ--ð'ÿÿ--@ÿÀÙþ	ú"-û	ÿ ûÙþ--ð'ÿÿ--@ÿÀÛþ	ú"- ûÛþûÿ--ð'ÿÿ--@ÿÀÕþ	ú"-ûÿ"ûÕþ--ð'ÿÿ--@À¢ÿ	ú"-æú|ôú¢ÿ--ð'ÿÿ--@À¡ÿ	ú"-ôú¡ÿæú--ð'ÿÿ--@À¡ÿ	ú"-æú|ôú¡ÿ--ð'ÿÿ--@À¡ÿ	ú"-óú¡ÿåú--ð'ÿÿ--@À ÿ	ú"-äúòú ÿ--ð'ÿÿ--@À ÿ	ú"-ñú ÿâú--ð'ÿÿ--@À ÿ	ú"-àúzïú ÿ--ð'ÿÿ--@À ÿ	ú"-íú ÿÞú--ð'ÿÿ--@Àÿ	ú"-Üúzëúÿ--ð'ÿÿ--@Àÿ	ú"-éúÿÚú~--ð'ÿÿ--@Àÿ	ú"-Øúyçúÿ--ð'ÿÿ--@Àÿ	ú"-åúÿÕú~--ð'ÿÿ--@Àÿ	ú"-Óúyãúÿ--ð'ÿÿ--@Àÿ	ú"-áúÿÑú~--ð'ÿÿ--@Àÿ	ú"-Ðúyßúÿ--ð'ÿÿ--@Àÿ	ú"-ÞúÿÎú~--ð'ÿÿ--@Àÿ	ú"-ÍúzÝúÿ--ð'ÿÿ--@À ÿ	ú"-Üú ÿÌú--ð'ÿÿ--@À ÿ	ú"-ËúzÛú ÿ--ð'ÿÿ--@À ÿ	ú"-Ûú ÿËú--ð'ÿÿ--¿üWûüËú	ú"-üËú·üOû--ð'ÿÿ--¿üXûüÈú	ú"-·üPûüÈú--ð'ÿÿ--ÀüXûüÈú	ú"-üÈú¸üPû--ð'ÿÿ--ÂüWûüÅú	ú"-ºüOûüÅú--ð'ÿÿ--ÃüWûüÈú	ú"-üÈú»üOû--ð'ÿÿ--ÄüVûüÃú	ú"-¼üNûüÃú--ð'ÿÿ--ÅüUûüÆú	ú"-üÆú½üMû--ð'ÿÿ--ÆüTûüÁú	ú"-¾üLûüÁú--ð'ÿÿ--ÈüSû!üÃú	ú"-!üÃúÀüKû--ð'ÿÿ--ÊüQûü¾ú	ú"-ÂüIûü¾ú--ð'ÿÿ--ËüPû%üÀú	ú"-%üÀúÃüHû--ð'ÿÿ--ÌüNû"üºú	ú"-ÄüFû"üºú--ð'ÿÿ--ÍüLû'ü¼ú	ú"-'ü¼úÅüDû--ð'ÿÿ--ÎüKû%ü·ú	ú"-ÆüCû%ü·ú--ð'ÿÿ--ÏüIû)ü¸ú	ú"-)ü¸úÇüAû--ð'ÿÿ--ÏüHû&ü´ú	ú"-Çü@û&ü´ú--ð'ÿÿ--ÐüGû*üµú	ú"-*üµúÈü?û--ð'ÿÿ--ÐüFû&ü±ú	ú"-Èü>û&ü±ú--ð'ÿÿ--ÐüEû-ü¶ú	ú"--ü¶úÈü=û--ð'ÿÿ--ÏüDû)ü³ú	ú"-Çü<û)ü³ú--ð'ÿÿ--Æüü¤üÜû	ú"-¾üÜû¤üÿû--ð'ÿÿ--Èü	ü£üÚû	ú"-£üüÀüÚû--ð'ÿÿ--Èüü£üÜû	ú"-ÀüÜû£üü--ð'ÿÿ--Êüü£üÚû	ú"-£üüÂüÚû--ð'ÿÿ--Çüü¢üßû	ú"-¿üßû¢üü--ð'ÿÿ--Ìüü£üÛû	ú"-£üüÄüÛû--ð'ÿÿ--Êüü£üàû	ú"-Âüàû£ü	ü--ð'ÿÿ--Íüü¤üÞû	ú"-¤üüÅüÞû--ð'ÿÿ--Ìüü¥üäû	ú"-Äüäû¥üü--ð'ÿÿ--Ñüü¦üâû	ú"-¦üüÉüâû--ð'ÿÿ--Ðüü¨üæû	ú"-Èüæû¨üü--ð'ÿÿ--Ôüü©üäû	ú"-©üüÌüäû--ð'ÿÿ--Óüü«üéû	ú"-Ëüéû«üü--ð'ÿÿ--Øüü­üæû	ú"-­üüÐüæû--ð'ÿÿ--Øüü®üéû	ú"-Ðüéû®üü--ð'ÿÿ--Ùüü°üéû	ú"-°üüÑüéû--ð'ÿÿ--Ùüü±üìû	ú"-Ñüìû±üü--ð'ÿÿ--Ýüü³üèû	ú"-³üüÕüèû--ð'ÿÿ--Ùüüµüíû	ú"-Ñüíûµüü--ð'ÿÿ--Ýüü¶üéû	ú"-¶üüÕüéû--ð'ÿÿ--5þ^ûwýÝú	ú"-wýVû-þÝú--ð'ÿÿ--6þaûsýÜú	ú"-.þÜúsýYû--ð'ÿÿ--6þ^ûwýÜú	ú"-wýVû.þÜú--ð'ÿÿ--5þ_ûsýÛú	ú"--þÛúsýWû--ð'ÿÿ--5þwýÚú	ú"-wýTû-þÚú--ð'ÿÿ--4þ]ûrýÙú	ú"-,þÙúrýUû--ð'ÿÿ--4þXûuý×ú	ú"-uýPû,þ×ú--ð'ÿÿ--3þYûqýÕú	ú"-+þÕúqýQû--ð'ÿÿ--2þUûsýÔú	ú"-sýMû*þÔú--ð'ÿÿ--0þVûnýÒú	ú"-(þÒúnýNû--ð'ÿÿ--/þQûqýÐú	ú"-qýIû'þÐú--ð'ÿÿ--.þRûlýÎú	ú"-&þÎúlýJû--ð'ÿÿ---þNûnýÍú	ú"-nýFû%þÍú--ð'ÿÿ--,þOûiýËú	ú"-$þËúiýGû--ð'ÿÿ--+þKûlýÊú	ú"-lýCû#þÊú--ð'ÿÿ--*þLûgýÉú	ú"-"þÉúgýDû--ð'ÿÿ--)þIûjýÈú	ú"-jýAû!þÈú--ð'ÿÿ--(þKûeýÇú	ú"- þÇúeýCû--ð'ÿÿ--(þHûiýÇú	ú"-iý@û þÇú--ð'ÿÿ--'þJûdýÇú	ú"-þÇúdýBû--ð'ÿÿ--£VûÈú	ú"-NûÈú--ð'ÿÿ--£XûýÈú	ú"-ÈúýPû--ð'ÿÿ--£XûýÇú	ú"-ýPûÇú--ð'ÿÿ--£YûùÆú	ú"-ÆúùQû--ð'ÿÿ--£UûüÅú	ú"-üMûÅú--ð'ÿÿ--£WûøÃú	ú"-ÃúøOû--ð'ÿÿ--¡RûûÂú	ú"-ûJûÂú--ð'ÿÿ--¡SûöÀú	ú"-ÀúöKû--ð'ÿÿ-- Nûù¿ú	ú"-ùFû¿ú--ð'ÿÿ--Pûô½ú	ú"-½úôHû--ð'ÿÿ--Kûö»ú	ú"-öCû»ú--ð'ÿÿ--Lûðºú	ú"-ºúðDû--ð'ÿÿ--Hûó¹ú	ú"-ó@û¹ú--ð'ÿÿ--Iûí¸ú	ú"-¸úíAû--ð'ÿÿ--Eûï¶ú	ú"-ï=û¶ú--ð'ÿÿ--Gûê¶ú	ú"-¶úê?û--ð'ÿÿ--Dûíµú	ú"-í<ûµú--ð'ÿÿ--Fûèµú	ú"-µúè>û--ð'ÿÿ--@ûïµú	ú"-ï8ûµú--ð'ÿÿ--Dûêµú	ú"-µúê<û--ð'ÿÿ--ðÝûÈ°û	ú"-èÕûÈ°û--ð'ÿÿ--ñßûÇ¯û	ú"-Ç¯ûé×û--ð'ÿÿ--íÚûÆ®û	ú"-åÒûÆ®û--ð'ÿÿ--ñàûÄ®û	ú"-Ä®ûéØû--ð'ÿÿ--ìÜûÂ­û	ú"-äÔûÂ­û--ð'ÿÿ--ïãûÁ­û	ú"-Á­ûçÛû--ð'ÿÿ--êßû¿­û	ú"-â×û¿­û--ð'ÿÿ--ëãû½­û	ú"-½­ûãÛû--ð'ÿÿ--æáû»®û	ú"-ÞÙû»®û--ð'ÿÿ--çåûº¯û	ú"-º¯ûßÝû--ð'ÿÿ--ããû¹°û	ú"-ÛÛû¹°û--ð'ÿÿ--äèû·±û	ú"-·±ûÜàû--ð'ÿÿ--àçû¶³û	ú"-Øßû¶³û--ð'ÿÿ--âìûµµû	ú"-µµûÚäû--ð'ÿÿ--Þëûµ¶û	ú"-Öãûµ¶û--ð'ÿÿ--Þíûµ¸û	ú"-µ¸ûÖåû--ð'ÿÿ--Üëûµºû	ú"-Ôãûµºû--ð'ÿÿ--Üíûµ»û	ú"-µ»ûÔåû--ð'ÿÿ--Úìû¶½û	ú"-Òäû¶½û--ð'ÿÿ--Þñû¶¾û	ú"-¶¾ûÖéû--ð'ÿÿ--Ccûáú	ú"-áú;[û--ð'ÿÿ--Dcûßú	ú"-<[ûßú--ð'ÿÿ--Dcûáú	ú"-áú<[û--ð'ÿÿ--EbûÞú	ú"-=ZûÞú--ð'ÿÿ--Fbûàú	ú"-àú>Zû--ð'ÿÿ--GaûÜú	ú"-?YûÜú--ð'ÿÿ--H_ûÝú	ú"-Ýú@Wû--ð'ÿÿ--I^ûÙú	ú"-AVûÙú--ð'ÿÿ--JÚú	ú"-ÚúBTû--ð'ÿÿ--K[ûÕú	ú"-CSûÕú--ð'ÿÿ--MXûÖú	ú"-ÖúEPû--ð'ÿÿ--NWûÒú	ú"-FOûÒú--ð'ÿÿ--OUûÓú	ú"-ÓúGMû--ð'ÿÿ--PSûÎú	ú"-HKûÎú--ð'ÿÿ--PRûÏú	ú"-ÏúHJû--ð'ÿÿ--QQûËú	ú"-IIûËú--ð'ÿÿ--QOûÍú	ú"-ÍúIGû--ð'ÿÿ--ROûÉú	ú"-JGûÉú--ð'ÿÿ--RNûËú	ú"-ËúJFû--ð'ÿÿ--RNûÈú	ú"-JFûÈú--ð'ÿÿû@ÿTimes New RomanH-.	Èú2ÿ E10u`&TNPP	&ÿÿÿÿ---ð
Figure S1. Complete numbering scheme used in the GED refinements
